# Supplementary material for: Transcription Control Pathways Decode Patterned Synaptic Inputs into Diverse mRNA Expression Profiles
Source: PubMed Central journal article supplement (PMC4006808; doi:10.1371/journal.pone.0095154), 2014-05-01
Supplement: pone.0095154.s001.pdf [file pone.0095154.s001.pdf]

### Parameters source and notes

#### CaMKIV signaling

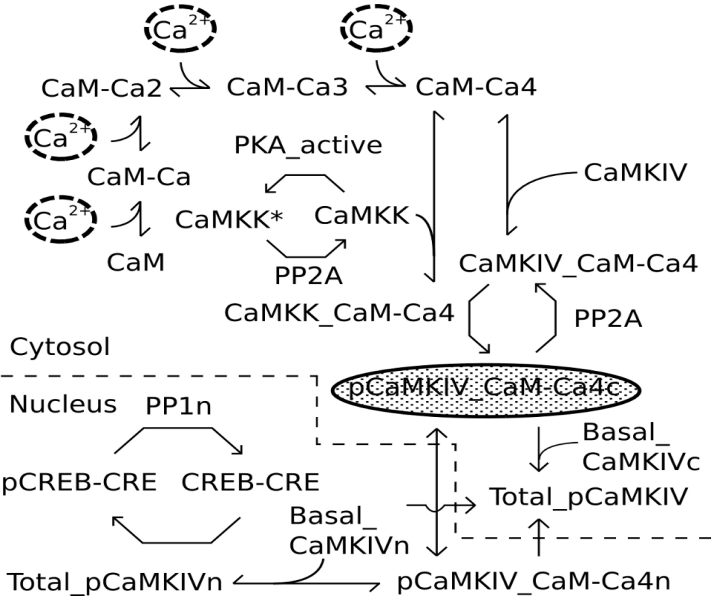

| Molecule      | Concentration (μM) | Buffered | Notes                                                                       |
|---------------|--------------------|----------|-----------------------------------------------------------------------------|
| CaMKK_cytosol | 0.5                | No       | Calculated from purification data assuming 7x10 <sup>7</sup> neurons/g (1). |
| PP2Ac         | 0.15               | Yes      | DOQCS                                                                       |
| CaMKIVn       | 1                  | No       | calculated from purification data assuming 7x10 <sup>7</sup> neurons/g (2)  |
| CREB-CRE      | 0.5                | No       | (3)                                                                         |

|               |         |    |                                                                                               |
|---------------|---------|----|-----------------------------------------------------------------------------------------------|
| Basal_CaMKIVc | 0.0005  | No | It was set to obtain significant Ca <sup>2</sup> /CaM-independent CaM kinase IV activity (4). |
| Basal_CaMKIVn | 0.00005 | No | It was set to obtain significant Ca <sup>2</sup> /CaM-independent CaM kinase IV activity (4). |

|    | Specification                                                  |  | Binding/Enzymatic Reaction                                                                                          | Rates                             | Notes                                                                         |
|----|----------------------------------------------------------------|--|---------------------------------------------------------------------------------------------------------------------|-----------------------------------|-------------------------------------------------------------------------------|
| 1) | Binding of Calmodulin-Calcium to CaMKIII                       |  | CaMKK_c + CaM-Ca <sub>4</sub> <=> CaMKK_CaM-Ca <sub>4</sub>                                                         | Kf=4.05 /sec/μM, Kb=0.02 /sec     | (5), (6)                                                                      |
| 2) | Binding of Calmodulin-Calcium to CaMKIV                        |  | CaMKIV + CaM-Ca <sub>4</sub> <=> CaMKIV_CaM-Ca <sub>4</sub>                                                         | Kf=0.01332 /sec/μM, Kb=0.01 /sec  | (5), (6)                                                                      |
| 3) | Phosphorylation of CaMKIV by CaMKK                             |  | CaMKIV_CaM-Ca <sub>4</sub> + CaMKK_CaM-Ca <sub>4</sub> -> pCaMKIV_CaM-Ca <sub>4</sub> c + CaMKK_CaM-Ca <sub>4</sub> | Km=1.3 μM, kcat=1.1 /sec          | Assumed                                                                       |
| 4) | Dephosphorylation of pCaMKIV                                   |  | pCaMKIV_CaM-Ca <sub>4</sub> c + PP2A -> CaMKIV_CaM-Ca <sub>4</sub> + PP2A                                           | Km=8.8 μM, kcat=2 /sec            | The rates was used by PP2A for other substrates (DOQCS) so we tried the same. |
| 5) | Transport of CaMKIV from cytosol to nucleus and vice versa     |  | pCaMKIV_CaM-Ca <sub>4</sub> c <=> pCaMKIV_CaM-Ca <sub>4</sub> n                                                     | Kf=0.0009 /sec, Kb=0.007 /sec     | It was set to obtain a slow transport.                                        |
| 6) | Transport of active PKA from cytosol to nucleus and vice versa |  | PKA-active <-> PKA-nucleus                                                                                          | Kf=0.000305 /sec, Kb=0.00125 /sec | (7)                                                                           |
| 7) | Phosphorylation of CaMKK by PKA-active                         |  | CaMKK + PKA-active -> CaMKK*                                                                                        | Km=4.699 μM, kcat=0.6833 /sec     | BRENDA                                                                        |
| 8) | Dephosphorylation of CaMKK* by PKA-active                      |  | CaMKK* + PP2A -> CaMKK                                                                                              | Km=4.99 μM, kcat=0.7 /sec         | BRENDA                                                                        |

|     |                                              |  |                                                                                      |                          |                                                                                                     |
|-----|----------------------------------------------|--|--------------------------------------------------------------------------------------|--------------------------|-----------------------------------------------------------------------------------------------------|
| 9)  | Sum total of nuclear and cytosolic CaMKIV    |  | Basal_CaMKIVc + pCaMKIV_CaM-Ca4c + pCaMKIV_CaM-Ca4n + Basal_CaMKIVn -> Total_pCaMKIV |                          | This reaction sums the level of Basal_CaMKIVc, pCaMKIV_CaM-Ca4c, pCaMKIV_CaM-Ca4n and Basal_CaMKIVn |
| 10) | Sum total of CaMKIVn                         |  | pCaMKIV_CaM-Ca4n + Basal_CaMKIVn -> Total_pCaMKIVn                                   |                          | This reaction sums the level of pCaMKIV_CaM-Ca4n and Basal_CaMKIVn.                                 |
| 11) | Phosphorylation of CREB-CRE by Total_pCaMKIV |  | CREB-CRE + Total_CaMKIVn -> pCREB-CRE + Total_pCaMKIVn                               | Km=5.5 μM, kcat=0.7 /sec | (8)                                                                                                 |
| 12) | Dephosphorylation of pCREB-CRE by PP1n       |  | pCREB-CRE + PP1n -> pCREB-CRE + PP1n                                                 | Km=5 μM, kcat=1 /sec     | BRENDA                                                                                              |

## MAPK signaling

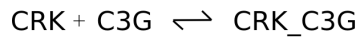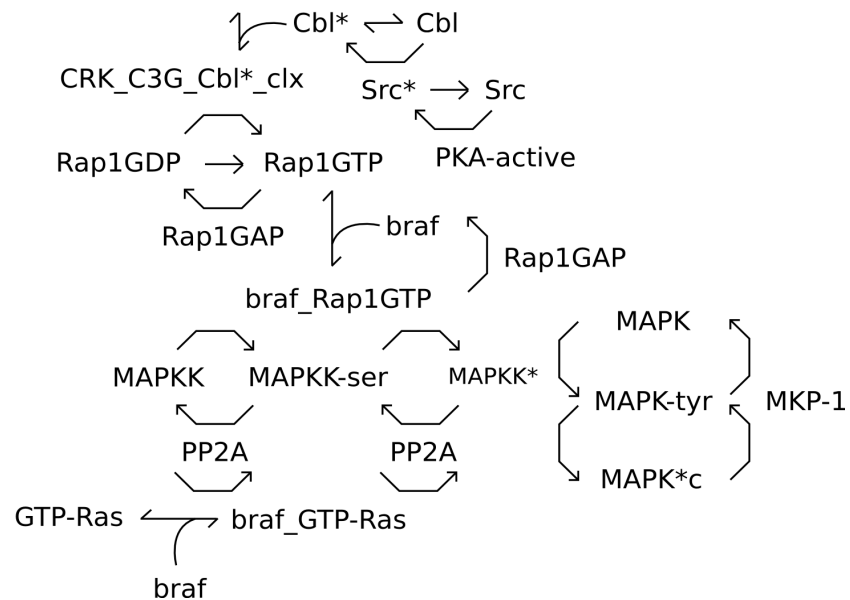

| Molecule | Concentration ( $\mu\text{M}$ ) | Buffered | Notes   |
|----------|---------------------------------|----------|---------|
| CRK      | 1                               | No       | (9)     |
| C3G      | 0.5                             | No       | (9)     |
| Cbl      | 0.5                             | No       | (9)     |
| Src      | 0.02                            | No       | Assumed |
| Rap-1GDP | 0.2                             | No       | (9)     |
| Rap-1GAP | 0.012                           | No       | (9)     |
| braf     | 0.2                             | No       | (9)     |
| MAPK     | 0.36                            | No       | DOQCS   |
| MKP-1    | 0.015                           | No       | DOQCS   |

|    | Specification                                        |  | Binding/Enzymatic Reaction                                          | Rates                                    | Notes                                                                         |
|----|------------------------------------------------------|--|---------------------------------------------------------------------|------------------------------------------|-------------------------------------------------------------------------------|
| 1) | Phosphorylation of Src by PKA_active                 |  | Src + PKA_active $\rightarrow$ Src* + PKA_active                    | Km=0.049 $\mu\text{M}$ , kcat=20 /sec    | BRENDA                                                                        |
| 2) | Conversion of Src* to Src                            |  | Src* $\rightleftharpoons$ Src                                       | Kf=100 /sec, Kb=0.1 /sec                 | Assumed                                                                       |
| 3) | Phosphorylation of Cbl by Src*                       |  | Cbl + Src* $\rightarrow$ Cbl* + Src*                                | Km=0.5 $\mu\text{M}$ , kcat=40 /sec      | BRENDA                                                                        |
| 4) | Conversion of Cbl* to Cbl                            |  | Cbl* $\rightleftharpoons$ Cbl                                       | Kf=10 /sec, Kb=0.01 /sec                 | Assumed                                                                       |
| 5) | Binding of CRK to C3G                                |  | CRK + C3G $\rightleftharpoons$ CRK_C3G                              | Kf=1 /sec/ $\mu\text{M}$ , Kb=0.002 /sec | (9)                                                                           |
| 6) | Binding of CRK_C3G to Cbl*                           |  | CRK_C3G + Cbl* $\rightleftharpoons$ CRK_C3G_Cbl*_clx                | Kf=1 /sec/ $\mu\text{M}$ , Kb=0.2 /sec   | CRK_C3G binds to other substrate with this affinity so we tried the same (9). |
| 7) | Conversion of Rap1GDP to Rap1GTP by CRK_C3G_Cbl*_clx |  | Rap1GDP + CRK_C3G_Cbl*_clx $\rightarrow$ Rap1GTP + CRK_C3G_Cbl*_clx | Km=0.0099 $\mu\text{M}$ , kcat=0.2 /sec  | (9)                                                                           |
| 8) | Conversion of Rap1GDP by Intrinsic GTPase            |  | Rap1GTP $\rightleftharpoons$ Rap1GDP                                | Kf=0.0001 /sec, Kb=0                     | (9)                                                                           |

|     |                                              |  |                                                    |                            |       |
|-----|----------------------------------------------|--|----------------------------------------------------|----------------------------|-------|
| 9)  | Hydrolysis of Rap1GTP by Rap1GAP             |  | Rap1GTP + Rap1GAP -> Rap1GDP + Rap1GAP             | Km=0.999 μM, kcat=2 /sec   | (9)   |
| 10) | Binding of braf to Rap1GTP                   |  | Rap1GTP + braf <=> braf_Rap1GTP                    | Kf=60 /sec/μM, kb=0.5 /sec | (9)   |
| 11) | Binding of braf to GTP-Ras                   |  | GTP-Ras + braf <=> braf_GTP-Ras                    | Kf=60 /sec/μM, kb=0.5 /sec | (9)   |
| 12) | Degradation of braf_Rap1GTP by Rap1GAP       |  | braf_Rap1GTP + Rap1GAP -> braf + Rap1GTP + Rap1GAP | Km=0.999 μM, kcat=2 /sec   | (9)   |
| 13) | Phosphorylation of MAPKK by braf_Rap1GTP     |  | MAPKK + braf_Rap1GTP -> MAPKK-ser + braf_Rap1GTP   | Km=0.16 μM, kcat=0.3 /sec  | (9)   |
| 14) | Phosphorylation of MAPKK-ser by braf_Rap1GTP |  | MAPKK-ser + braf_Rap1GTP -> MAPKK* + braf_Rap1GTP  | Km=0.16 μM, kcat=0.3 /sec  | (9)   |
| 15) | Phosphorylation of MAPKK by braf_GTP-Ras     |  | MAPKK + braf_GTP-Ras -> MAPKK-ser + braf_GTP-Ras   | Km=0.16 μM, kcat=0.2 /sec  | (9)   |
| 16) | Phosphorylation of MAPKK-ser by braf_GTP-Ras |  | MAPKK-ser + braf_GTP-Ras -> MAPKK* + braf_GTP-Ras  | Km=0.16 μM, kcat=0.2 /sec  | (9)   |
| 17) | Dephosphorylation of MAPKK by PP2A           |  | MAPKK-ser + PP2A -> MAPKK + PP2A                   | Km=15.657 μM, kcat=6 /sec  | (9)   |
| 18) | Dephosphorylation of MAPKK by PP2A           |  | MAPKK* + PP2A -> MAPKK-ser + PP2A                  | Km=15.657 μM, kcat=6 /sec  | (9)   |
| 19) | Phosphorylation of MAPK by MAPKK*            |  | MAPK + MAPKK* -> MAPK-tyr + MAPKK*                 | Km=0.046 μM, kcat=0.3 /sec | DOQCS |
| 20) | Phosphorylation of MAPK-tyr by MAPKK*        |  | MAPK-tyr + MAPKK* -> MAPK*c + MAPKK*               | Km=0.046 μM, kcat=0.3 /sec | DOQCS |
| 21) | Dephosphorylation of MAPK-tyr by MKP-1       |  | MAPK-tyr + MKP-1 -> MAPK + MKP-1                   | Km=0.133 μM, kcat=4 /sec   | DOQCS |
| 22) | Dephosphorylation of MAPK-tyr by MKP-1       |  | MAPK*c + MKP-1 -> MAPK-tyr + MKP-1                 | Km=0.133 μM, kcat=4 /sec   | DOQCS |

## MAPK $\kappa$ n signaling

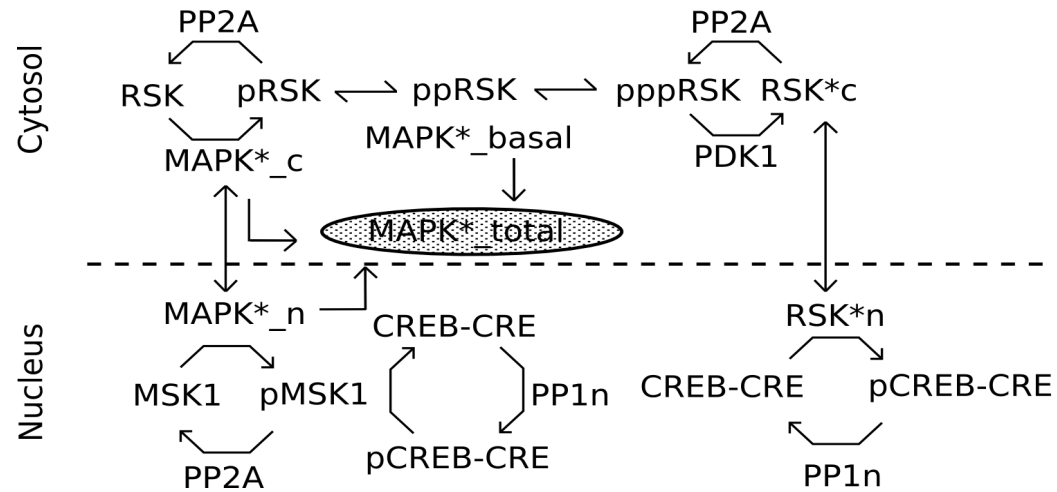

| Molecule | Concentration ( $\mu\text{M}$ ) | Buffered | Notes                                                                                                      |
|----------|---------------------------------|----------|------------------------------------------------------------------------------------------------------------|
| RSK      | 0.2                             | No       | Biomodels                                                                                                  |
| PDK1     | 1                               | No       | (10)                                                                                                       |
| MSK1     | 0.2                             | No       | Literature reports high expression of MSK1 in hippocampus (20).                                            |
| CREB-CRE | 0.5                             | No       | In the basal state CREB is bound in a dimer form to the CAMP response element (CRE) sites of DNA (21) (3). |
| PP2An    | 0.1                             | No       | Calculated from given N/C ratio (22). The concentration of PP2Ac is taken from DOQCS.                      |

|     | Specification                                               |  | Binding/Enzymatic Reaction            | Rates                         | Notes                                                                                       |
|-----|-------------------------------------------------------------|--|---------------------------------------|-------------------------------|---------------------------------------------------------------------------------------------|
| 1)  | Phosphorylation of RSK by MAPK*_c                           |  | RSK + MAPK*_c -> pRSK + MAPK*_c       | Km=5.3 μM, kcat=1.7 /sec      | Biomodels                                                                                   |
| 2)  | Autophosphorylation of RSK                                  |  | pRSK <=> ppRSK                        | Kf=0.1 /sec, Kb=10 /sec       | Assumed                                                                                     |
| 3)  | Phosphorylation of ppRSK by PDK1                            |  | ppRSK + PDK1 -> RSK*c + PDK1          | Km=10 μM, kcat=1 /sec         | PDK1 have assigned this Km and kcat for different substrates but I tried for this too (10). |
| 4)  | Dephosphorylation of pRSK by PP2A                           |  | pRSK + PP2A -> RSK + PP2A             | Km=8.8 μM, kcat=1 /sec        | (10)                                                                                        |
| 5)  | Dephosphorylation of RSK*c by PP2A                          |  | RSK*c + PP2A -> ppRSK + PP2A          | Km=8.8 μM, kcat=1 /sec        | (10)                                                                                        |
| 6)  | Transport of MAPK*_c from cytosol to nucleus and vice versa |  | MAPK*_c <-> MAPK*n                    | Kf=0.0001 /sec, Kb=0.003 /sec | (11), (12)                                                                                  |
| 7)  | Phosphorylation of MSK1 by MAPK*_n                          |  | MSK1 + MAPK*_n -> pMSK1 + MAPK*_n     | Km=5.3 μM, kcat=0.1 /sec      | We used the same Km for MAPK as it is used by MAPK for RSK                                  |
| 8)  | Dephosphorylation of pMSK1 by PP2A                          |  | pMSK1 + PP2A -> MSK1 + PP2A           | Km=8.8 μM, kcat=1 /sec        | (10)                                                                                        |
| 9)  | Phosphorylation of CREB-CRE by pMSK1                        |  | CREB-CRE + pMSK1 -> pCREB-CRE + pMSK1 | Km=2 μM, kcat=0.1 /sec        | MSK1 phosphorylates CREB with a Km lower than RSK1 and PKA (Km= 5 uM) (13), (14).           |
| 10) | Dephosphorylation of pCREB-CRE by PP1n                      |  | pCREB-CRE + PP1n -> pCREB-CRE + PP1n  | Km=5 μM, kcat=1 /sec          | DOQCS                                                                                       |

|     |                                                            |  |                                                |                                  |                                                                                        |
|-----|------------------------------------------------------------|--|------------------------------------------------|----------------------------------|----------------------------------------------------------------------------------------|
| 11) | Transport of RSK*_c from cytosol to nucleus and vice versa |  | RSK*c <-> RSK*n                                | Kf = 0.001 /sec, Kb = 0.005 /sec | The rates are set to assign a slow transport.                                          |
| 12) | Phosphorylation of CREB-CRE by RSK*n                       |  | CREB-CRE + RSK*n -> pCREB-CRE + RSK*n          | Km=5 μM, kcat=0.1 /sec           | CREB is a poor substrate for RSK in compare to MSK. So, we have set the Km higher (14) |
| 13) | Dephosphorylation of pCREB-CRE by PP1n                     |  | pCREB-CRE + PP1n -> pCREB-CRE + PP1n           | Km=5 μM, kcat=1 /sec             | DOQCS                                                                                  |
| 14) | Sum total of active_MAPK                                   |  | MAPK*_basal + MAPK*_c + MAPK*_n -> MAPK*_total |                                  | This reaction sums the level of MAPK*_basal, MAPK*_c and MAPK*_n                       |

### mRNA synthesis model

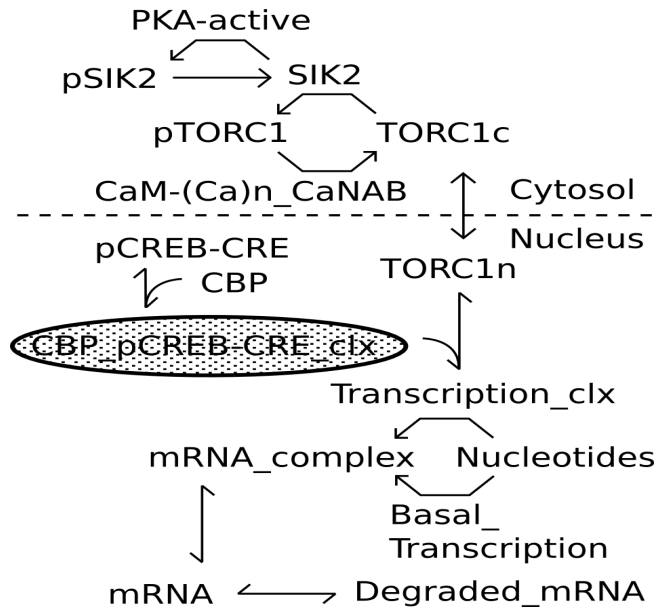



| Molecule            | Concentration ( $\mu\text{M}$ ) | Buffered | Notes                                                          |
|---------------------|---------------------------------|----------|----------------------------------------------------------------|
| SIK2                | 0.5                             | No       | SIK2 is present in abundance in neurons (15).                  |
| TORC1c              | 0.1                             | No       | TORC1 mRNA and protein is highly expressed in hippocampus (16) |
| CBP                 | 0.5                             | No       | Biomodels (2 =BIOMD0000000395)                                 |
| Nucleotides         | 0.2                             | Yes      | DOQCS                                                          |
| Basal_Transcription | 0.00005                         | No       | This is set on account of CREB independent mRNA synthesis.     |

|    | Specification                                              |  | Binding/Enzymatic Reaction                                      | Rates                                 | Notes                                                  |
|----|------------------------------------------------------------|--|-----------------------------------------------------------------|---------------------------------------|--------------------------------------------------------|
| 1) | Phosphorylation of SIK2 by PKA-active                      |  | SIK2 + PKA-active $\rightarrow$ pSIK2 + PKA-active              | Km=4.56 $\mu\text{M}$ , kcat=0.1 /sec | BRENDA                                                 |
| 2) | Conversion of pSIK2                                        |  | pSIK2 $\leftrightarrow$ SIK2                                    | Kf=0.1 /sec, Kb=0                     | Assumed                                                |
| 3) | Phosphorylation of TORC1c by SIK2                          |  | TORC1c + SIK2 $\rightarrow$ pTORC1 + SIK2                       | Km=4 $\mu\text{M}$ , kcat=0.4 /sec    | Assumed                                                |
| 4) | Dephosphorylation of pTORC1 by CaM-(Ca)n_CaNAB             |  | pTORC1 + CaM-(Ca)n_CaNAB $\rightarrow$ TORC1c + CaM-(Ca)n_CaNAB | Km=0.4 $\mu\text{M}$ , kcat=0.1 /sec  | BRENDA                                                 |
| 5) | Transport of TORC1c from cytosol to nucleus and vice versa |  | TORC1c $\leftrightarrow$ TORC1n                                 | Kf = 0.01 /sec, Kb=0.001 /sec         | Assumed but set in such a way to give a slow transport |

|     |                                         |  |                                                              |                                           |                                                                                              |
|-----|-----------------------------------------|--|--------------------------------------------------------------|-------------------------------------------|----------------------------------------------------------------------------------------------|
| 6)  | Binding of pCREB-CRE and CBP            |  | pCREB-CRE + CBP $\rightleftharpoons$ CBP_pCREB-CRE_clx       | Kf = 0.114 /sec/ $\mu$ M, Kb = 0.025 /sec | constrained on the basis of this publication (17)                                            |
| 7)  | Binding of CBP_pCREB_CRE_clx and TORC1n |  | CBP_pCREB_CRE_clx + TORC1n $\rightarrow$ Transcription_clx   | Kf = 1 /sec/ $\mu$ M, Kb = 0.1 /sec       | (18)                                                                                         |
| 8)  | mRNA synthesis                          |  | Nucleotides + Transcription_clx $\rightarrow$ mRNA complex   | Km=1.08 $\mu$ M, kcat=0.05 /sec           | We have estimated the parameters to obtain around 17 molecules/copies of mRNA per cell (19). |
| 9)  | Basal mRNA synthesis                    |  | Nucleotides + Basal_Transcription $\rightarrow$ mRNA complex | Km=1.08 $\mu$ M, kcat=0.05 /sec           | We have estimated the parameters to obtain around 17 molecules/copies of mRNA per cell (19). |
| 10) | mRNA elongation                         |  | mRNA_complex $\rightleftharpoons$ mRNA                       | Kf = 1.44 /sec, Kb = 0.0001 /sec          | Assumed                                                                                      |
| 11) | Degradation of mRNA                     |  | mRNA $\rightleftharpoons$ Degraded_mRNA                      | Kf = 1 /sec, Kb = 0                       | We assigned a generic degradation rate of 1/sec.                                             |
|     |                                         |  |                                                              |                                           |                                                                                              |

## Supporting References

1. Okuno, S., T. Kitani, and H. Fujisawa. 1994. Purification and Characterization of Ca<sup>2+</sup>/Calmodulin-Dependent Protein Kinase IV Kinase from Rat Brain. *J. Biochem. (Tokyo)*. 116: 923–930.
2. Ohmstede, C.A., K.F. Jensen, and N.E. Sahyoun. 1989. Ca<sup>2+</sup>/calmodulin-dependent protein kinase enriched in cerebellar granule cells. Identification of a novel neuronal calmodulin-dependent protein kinase. *J. Biol. Chem.* 264: 5866–5875.
3. Mayr, B., and M. Montminy. 2001. Transcriptional regulation by the phosphorylation-dependent factor CREB. *Nat. Rev. Mol. Cell Biol.* 2: 599–609.
4. Selbert, M.A., K.A. Anderson, Q.-H. Huang, E.G. Goldstein, A.R. Means, et al. 1995. Phosphorylation and Activation of Ca-Calmodulin-dependent Protein Kinase IV by Ca-Calmodulin-dependent Protein Kinase Ia Kinase. *J. Biol. Chem.* 270: 17616–17621.
5. Matsushita, M., and A.C. Nairn. 1998. Characterization of the mechanism of regulation of Ca<sup>2+</sup>/calmodulin-dependent protein kinase I by calmodulin and by Ca<sup>2+</sup>/calmodulin-dependent protein kinase kinase. *J. Biol. Chem.* 273: 21473–21481.
6. Tokumitsu, H., and T.R. Soderling. 1996. Requirements for calcium and calmodulin in the calmodulin kinase activation cascade. *J. Biol. Chem.* 271: 5617–5622.
7. Harootunian, A.T., S.R. Adams, W. Wen, J.L. Meinkoth, S.S. Taylor, et al. 1993. Movement of the free catalytic subunit of cAMP-dependent protein kinase into and out of the nucleus can be explained by diffusion. *Mol. Biol. Cell.* 4: 993–1002.
8. Enslin, H., H. Tokumitsu, and T.R. Soderling. 1995. Phosphorylation of CREB by CaM-kinase IV activated by CaM-kinase IV kinase. *Biochem. Biophys. Res. Commun.* 207: 1038–1043.
9. Sasagawa, S., Y. Ozaki, K. Fujita, and S. Kuroda. 2005. Prediction and validation of the distinct dynamics of transient and sustained ERK activation. *Nat. Cell Biol.* 7: 365–373.
10. Jain, P., and U.S. Bhalla. 2009. Signaling logic of activity-triggered dendritic protein synthesis: an mTOR gate but not a feedback switch. *Plos Comput. Biol.* 5: e1000287.
11. Adachi, M., M. Fukuda, and E. Nishida. 1999. Two co-existing mechanisms for nuclear import of MAP kinase: passive diffusion of a monomer and active transport of a dimer. *Embo J.* 18: 5347–5358.

12. Fujioka, A., K. Terai, R.E. Itoh, K. Aoki, T. Nakamura, et al. 2006. Dynamics of the Ras/ERK MAPK cascade as monitored by fluorescent probes. *J. Biol. Chem.* 281: 8917–8926.
13. Roux, P.P., and J. Blenis. 2004. ERK and p38 MAPK-activated protein kinases: a family of protein kinases with diverse biological functions. *Microbiol. Mol. Biol. Rev. Mmbr.* 68: 320–344.
14. Deak, M., A.D. Clifton, L.M. Lucocq, and D.R. Alessi. 1998. Mitogen- and stress-activated protein kinase-1 (MSK1) is directly activated by MAPK and SAPK2/p38, and may mediate activation of CREB. *Embo J.* 17: 4426–4441.
15. Sasaki, T., H. Takemori, Y. Yagita, Y. Terasaki, T. Uebi, et al. 2011. SIK2 is a key regulator for neuronal survival after ischemia via TORC1-CREB. *Neuron.* 69: 106–119.
16. Zhou, Y., H. Wu, S. Li, Q. Chen, X.-W. Cheng, et al. 2006. Requirement of TORC1 for late-phase long-term potentiation in the hippocampus. *Plos One.* 1: e16.
17. Bito, H., K. Deisseroth, and R.W. Tsien. 1996. CREB phosphorylation and dephosphorylation: a Ca(2+)- and stimulus duration-dependent switch for hippocampal gene expression. *Cell.* 87: 1203–1214.
18. Luo, Q., K. Viste, J.C. Urdy-Zaa, G. Senthil Kumar, W.-W. Tsai, et al. 2012. Mechanism of CREB recognition and coactivation by the CREB-regulated transcriptional coactivator CRTC2. *Proc. Natl. Acad. Sci. U. S. A.* 109: 20865–20870.
19. Schwanhäusser, B., D. Busse, N. Li, G. Dittmar, J. Schuchhardt, et al. 2011. Global quantification of mammalian gene expression control. *Nature.* 473: 337–342.
20. Chwang, W.B., J.S. Arthur, A. Schumacher, and J.D. Sweatt. 2007. The nuclear kinase mitogen- and stress-activated protein kinase 1 regulates hippocampal chromatin remodeling in memory formation. *J. Neurosci. Off. J. Soc. Neurosci.* 27: 12732–12742.
21. Riedel, G., and B. Platt. 2004. *From Messengers to Molecules: Memories are Made of These.* Springer.
22. Turowski, P., A. Fernandez, B. Favre, N.J. Lamb, and B.A. Hemmings. 1995. Differential methylation and altered conformation of cytoplasmic and nuclear forms of protein phosphatase 2A during cell cycle progression. *J. Cell Biol.* 129: 397–410.

Databases referred:

DOQCS <http://doqcs.ncbs.res.in>

Biomodels <http://www.ebi.ac.uk/biomodels/>

BRENDA <http://www.brenda-enzymes.info/>

REACTOME <http://www.reactome.org/>
