# Supplementary material for: Transcription Control Pathways Decode Patterned Synaptic Inputs into Diverse mRNA Expression Profiles
Source: PubMed Central journal article supplement (PMC4006808; doi:10.1371/journal.pone.0095154), 2014-05-01
Supplement: pone.0095154.s002.pdf [file pone.0095154.s002.pdf]

## mRNA synthesis model

The entire model was divided into sub-modules. The major signaling pathways in our model were the CaMKIV pathway, MAPK pathway and PP1 pathway. These models were merged with previously published models for CaM, BDNF input pathway, PP1 and PKA signaling inputs. The following is a list of parameters (two enzyme parameters Michaelis constant ( $K_m$ ) and turnover number ( $k_{cat}$ )), two reaction parameters (forward rate ( $k_f$ ) and backward rate ( $k_b$ )), and the total concentrations of each molecule ( $Co_{init}$ ) were used to build-up the model. Concentration of few molecules are set as buffered (fixed concentration) shown by 1 and some are not buffered shown by 0 in the list.

$k_f$  and  $k_b$  are the scaled rates of  $k_f$  and  $k_b$  respectively which depend on cellular volume. The  $K_m$ ,  $k_{cat}$  depends on  $k_1$ ,  $k_2$ ,  $k_3$ . The relation is:

$$K_m = (k_2 + k_3)/k_1$$

$$k_{cat} = k_3$$

$$\text{ratio} = k_2/k_3$$

Volume of dendrite =  $1e-15 \text{ m}^3$  and volume of nucleus  $3.7e-16 \text{ m}^3$

Time units: Seconds (sec)

Concentration units: Micromolar ( $\mu\text{M}$ )

The modules are shown as group. Few reactions which are part of group and not included in the description of module are shown at bottom.

## Composite Model

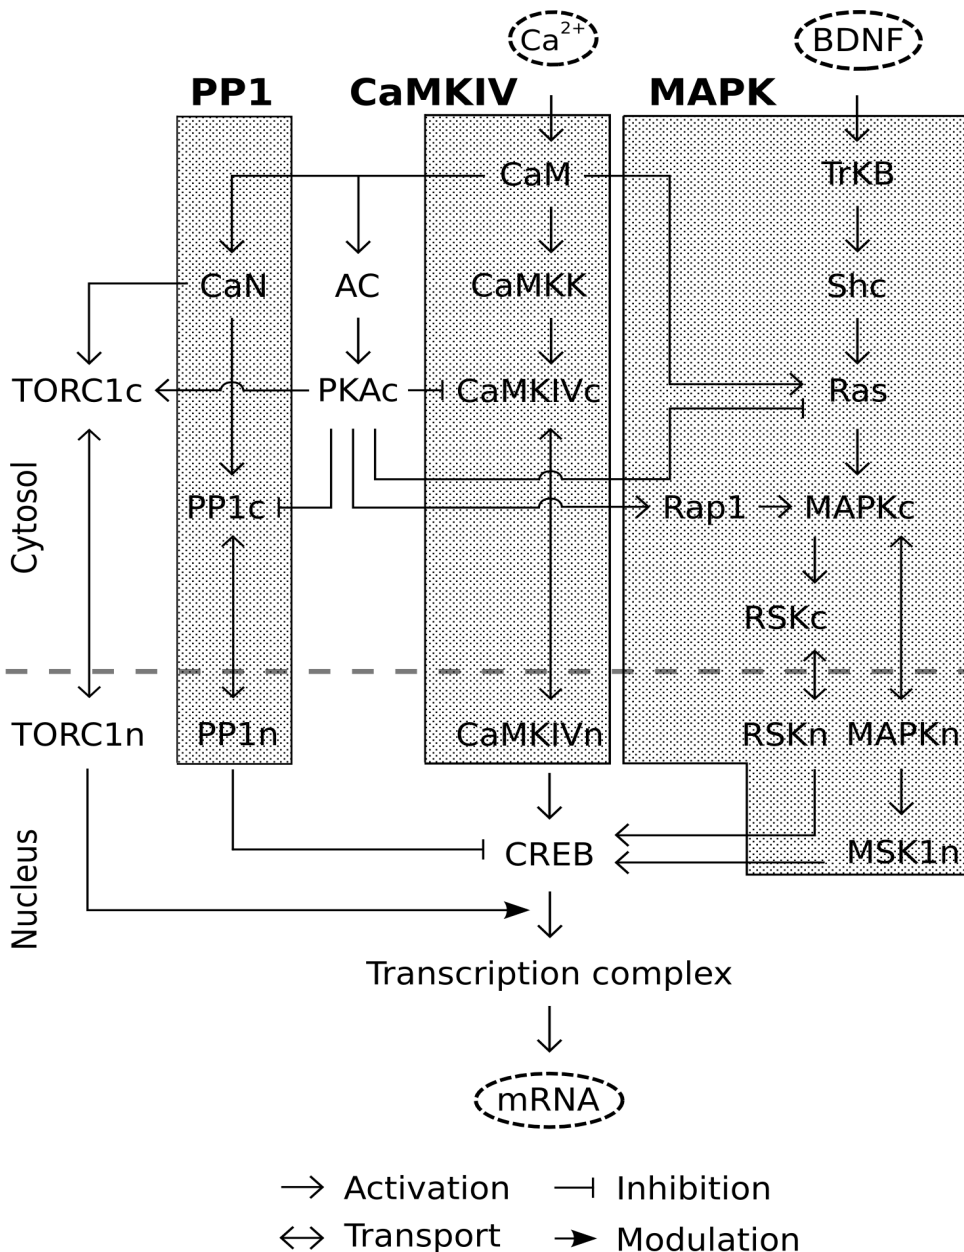

Concentration units: uM

Time units: sec

Default Volume (m<sup>3</sup>) : 1e-15

Equations for group /kinetics

Reactions for group /kinetics

| Reaction                                        | kf                                          | kb                                         | Kf                                        | Kb                                  |
|-------------------------------------------------|---------------------------------------------|--------------------------------------------|-------------------------------------------|-------------------------------------|
| Src_star <====> Src                             | 100 s <sup>-1</sup>                         | 0.1 s <sup>-1</sup>                        | 100 s <sup>-1</sup>                       | 0.1 s <sup>-1</sup>                 |
| Cbl_star <====> Cbl                             | 10 s <sup>-1</sup>                          | 0.01 s <sup>-1</sup>                       | 10 s <sup>-1</sup>                        | 0.01 s <sup>-1</sup>                |
| C3G + CRK <====> CRK_C3G                        | 1.6667e-06 # <sup>-1</sup> .s <sup>-1</sup> | 0.002 s <sup>-1</sup>                      | 1 uM <sup>-1</sup> .s <sup>-1</sup>       | 0.002 s <sup>-1</sup>               |
| Rap1GTP <====> Rap1GDP                          | 0.0001 s <sup>-1</sup>                      | 0 s <sup>-1</sup>                          | 0.0001 s <sup>-1</sup>                    | 0 s <sup>-1</sup>                   |
| Rap1GTP + bRaf <====> bRaf_Rap1GTP              | 0.0001 # <sup>-1</sup> .s <sup>-1</sup>     | 0.5 s <sup>-1</sup>                        | 60 uM <sup>-1</sup> .s <sup>-1</sup>      | 0.5 s <sup>-1</sup>                 |
| MAPK_star <====> MAPK_star_n                    | 0.0001 s <sup>-1</sup>                      | 0.003 s <sup>-1</sup>                      | 0.0001 s <sup>-1</sup>                    | 0.003 s <sup>-1</sup>               |
| active_RSK2 <====> active_RSK2_n                | 0.001 s <sup>-1</sup>                       | 0.005 s <sup>-1</sup>                      | 0.001 s <sup>-1</sup>                     | 0.005 s <sup>-1</sup>               |
| pRSK <====> ppRSK                               | 0.1 s <sup>-1</sup>                         | 10 s <sup>-1</sup>                         | 0.1 s <sup>-1</sup>                       | 10 s <sup>-1</sup>                  |
| Ca_input <====> Ca                              | 100 s <sup>-1</sup>                         | 100 s <sup>-1</sup>                        | 100 s <sup>-1</sup>                       | 100 s <sup>-1</sup>                 |
| Grb2 + Sos <====> Sos.Grb2                      | 4.1667e-07 # <sup>-1</sup> .s <sup>-1</sup> | 0.0168 s <sup>-1</sup>                     | 0.25 uM <sup>-1</sup> .s <sup>-1</sup>    | 0.0168 s <sup>-1</sup>              |
| Sos.Grb2 + Shc_star <====> Shc_star.Sos.Grb2    | 8.3333e-06 # <sup>-1</sup> .s <sup>-1</sup> | 0.1 s <sup>-1</sup>                        | 5 uM <sup>-1</sup> .s <sup>-1</sup>       | 0.1 s <sup>-1</sup>                 |
| Sos_star <====> Sos                             | 0.001 s <sup>-1</sup>                       | 0.1 s <sup>-1</sup>                        | 0.001 s <sup>-1</sup>                     | 0.1 s <sup>-1</sup>                 |
| CBP + pCREB_CRE <====> CBP_pCREB_CRE            | 5.1351e-07 # <sup>-1</sup> .s <sup>-1</sup> | 0.025 s <sup>-1</sup>                      | 0.114 uM <sup>-1</sup> .s <sup>-1</sup>   | 0.025 s <sup>-1</sup>               |
| mRNA_clx <====> mRNA                            | 1.44 s <sup>-1</sup>                        | 0.0001 s <sup>-1</sup>                     | 1.44 s <sup>-1</sup>                      | 0.0001 s <sup>-1</sup>              |
| mRNA <====> degraded_mRNA                       | 1 s <sup>-1</sup>                           | 0 s <sup>-1</sup>                          | 1 s <sup>-1</sup>                         | 0 s <sup>-1</sup>                   |
| Cbl_star + CRK_C3G <====> CRK_C3G_Cbl_star_clx  | 1.6667e-06 # <sup>-1</sup> .s <sup>-1</sup> | 0.2 s <sup>-1</sup>                        | 1 uM <sup>-1</sup> .s <sup>-1</sup>       | 0.2 s <sup>-1</sup>                 |
| Grb2 + Sos_star <====> Sos_star.Grb2            | 4.1667e-08 # <sup>-1</sup> .s <sup>-1</sup> | 0.0168 s <sup>-1</sup>                     | 0.025 uM <sup>-1</sup> .s <sup>-1</sup>   | 0.0168 s <sup>-1</sup>              |
| TORC1c <====> TORC1n                            | 0.01 s <sup>-1</sup>                        | 0.001 s <sup>-1</sup>                      | 0.01 s <sup>-1</sup>                      | 0.001 s <sup>-1</sup>               |
| TORC1n + CBP_pCREB_CRE <====> Transcription_clx | 4.5045e-06 # <sup>-1</sup> .s <sup>-1</sup> | 0.1 s <sup>-1</sup>                        | 1 uM <sup>-1</sup> .s <sup>-1</sup>       | 0.1 s <sup>-1</sup>                 |
| SIK2_star <====> SIK2                           | 0.1 s <sup>-1</sup>                         | 0 s <sup>-1</sup>                          | 0.1 s <sup>-1</sup>                       | 0 s <sup>-1</sup>                   |
| PP1-I1n <====> PP1_active_n + I1n               | 1 s <sup>-1</sup>                           | 9.009e-06 # <sup>-1</sup> .s <sup>-1</sup> | 1 s <sup>-1</sup>                         | 2 uM <sup>-1</sup> .s <sup>-1</sup> |
| PP1-I1 <====> PP1-I1n                           | 0.003 s <sup>-1</sup>                       | 0.003 s <sup>-1</sup>                      | 0.003 s <sup>-1</sup>                     | 0.003 s <sup>-1</sup>               |
| PP1_active_n + I1n <====> PP1-I1n               | 2.2521e-06 # <sup>-1</sup> .s <sup>-1</sup> | 0.1 s <sup>-1</sup>                        | 0.49997 uM <sup>-1</sup> .s <sup>-1</sup> | 0.1 s <sup>-1</sup>                 |
| Shc_star <====> Shc                             | 0.2 s <sup>-1</sup>                         | 0 s <sup>-1</sup>                          | 0.2 s <sup>-1</sup>                       | 0 s <sup>-1</sup>                   |

Enzymes for group /kinetics

| Enzyme-reaction                                  | k1                                          | k2                     | k3                      | Km          | kcat                    | ratio |
|--------------------------------------------------|---------------------------------------------|------------------------|-------------------------|-------------|-------------------------|-------|
| AC2 ---PKC-active--> AC2_star                    | 1e-06 # <sup>-1</sup> .s <sup>-1</sup>      | 16 s <sup>-1</sup>     | 4 s <sup>-1</sup>       | 33.333 uM   | 4 s <sup>-1</sup>       | 4     |
| GAP ---PKC-active--> GAP_star                    | 1e-05 # <sup>-1</sup> .s <sup>-1</sup>      | 16 s <sup>-1</sup>     | 4 s <sup>-1</sup>       | 3.3333 uM   | 4 s <sup>-1</sup>       | 4     |
| inact-GEF ---PKC-active--> GEF_star              | 1e-05 # <sup>-1</sup> .s <sup>-1</sup>      | 16 s <sup>-1</sup>     | 4 s <sup>-1</sup>       | 3.3333 uM   | 4 s <sup>-1</sup>       | 4     |
| craf-1 ---PKC-active--> craf-1_star              | 4.9999e-07 # <sup>-1</sup> .s <sup>-1</sup> | 16 s <sup>-1</sup>     | 4 s <sup>-1</sup>       | 66.668 uM   | 4 s <sup>-1</sup>       | 4     |
| cAMP-PDE ---PKA-active--> cAMP-PDE_star          | 1e-05 # <sup>-1</sup> .s <sup>-1</sup>      | 36 s <sup>-1</sup>     | 9 s <sup>-1</sup>       | 7.5 uM      | 9 s <sup>-1</sup>       | 4     |
| Src ---PKA-active--> Src_star                    | 0.0033334 # <sup>-1</sup> .s <sup>-1</sup>  | 80 s <sup>-1</sup>     | 20 s <sup>-1</sup>      | 0.049999 uM | 20 s <sup>-1</sup>      | 4     |
| inact-GEF ---PKA-active--> inact-GEF_star        | 1e-05 # <sup>-1</sup> .s <sup>-1</sup>      | 36 s <sup>-1</sup>     | 9 s <sup>-1</sup>       | 7.5 uM      | 9 s <sup>-1</sup>       | 4     |
| I1 ---PKA-active--> I1_star                      | 1e-05 # <sup>-1</sup> .s <sup>-1</sup>      | 36 s <sup>-1</sup>     | 9 s <sup>-1</sup>       | 7.5 uM      | 9 s <sup>-1</sup>       | 4     |
| CaMKK_CaM_Ca_c ---PKA-active--> CaM-Ca4 + CaMKKp | 1.2116e-06 # <sup>-1</sup> .s <sup>-1</sup> | 2.7333 s <sup>-1</sup> | 0.68333 s <sup>-1</sup> | 4.6999 uM   | 0.68333 s <sup>-1</sup> | 4     |
| SIK2 ---PKA-active--> SIK2_star                  | 1.8117e-07 # <sup>-1</sup> .s <sup>-1</sup> | 0.4 s <sup>-1</sup>    | 0.1 s <sup>-1</sup>     | 4.5997 uM   | 0.1 s <sup>-1</sup>     | 4     |
| I1n ---PKA-active_n--> I1_star_n                 | 2.7027e-05 # <sup>-1</sup> .s <sup>-1</sup> | 36 s <sup>-1</sup>     | 9 s <sup>-1</sup>       | 7.5 uM      | 9 s <sup>-1</sup>       | 4     |
| bRaf_Rap1GTP ---Rap1GAP--> Rap1GDP + bRaf        | 0.00033667 # <sup>-1</sup> .s <sup>-1</sup> | 200 s <sup>-1</sup>    | 2 s <sup>-1</sup>       | 0.99999 uM  | 2 s <sup>-1</sup>       | 100   |
| Rap1GTP ---Rap1GAP--> Rap1GDP                    | 0.00033667 # <sup>-1</sup> .s <sup>-1</sup> | 200 s <sup>-1</sup>    | 2 s <sup>-1</sup>       | 0.99999 uM  | 2 s <sup>-1</sup>       | 100   |
| MAPKK-ser ---bRaf_Rap1GTP--> MAPKK_star          | 1.5625e-05 # <sup>-1</sup> .s <sup>-1</sup> | 1.2 s <sup>-1</sup>    | 0.3 s <sup>-1</sup>     | 0.16 uM     | 0.3 s <sup>-1</sup>     | 4     |
| MAPKK ---bRaf_Rap1GTP--> MAPKK-ser               | 1.5625e-05 # <sup>-1</sup> .s <sup>-1</sup> | 1.2 s <sup>-1</sup>    | 0.3 s <sup>-1</sup>     | 0.16 uM     | 0.3 s <sup>-1</sup>     | 4     |
| MAPK-tyr ---MKP-1--> MAPK                        | 0.00025 # <sup>-1</sup> .s <sup>-1</sup>    | 16 s <sup>-1</sup>     | 4 s <sup>-1</sup>       | 0.13333 uM  | 4 s <sup>-1</sup>       | 4     |
| MAPK_star ---MKP-1--> MAPK-tyr                   | 0.00025 # <sup>-1</sup> .s <sup>-1</sup>    | 16 s <sup>-1</sup>     | 4 s <sup>-1</sup>       | 0.13333 uM  | 4 s <sup>-1</sup>       | 4     |
| craf-1_star ---PPHosphatase2A--> craf-1          | 3.1935e-06 # <sup>-1</sup> .s <sup>-1</sup> | 24 s <sup>-1</sup>     | 6 s <sup>-1</sup>       | 15.657 uM   | 6 s <sup>-1</sup>       | 4     |
| MAPKK_star ---PPHosphatase2A--> MAPKK-ser        | 3.1935e-06 # <sup>-1</sup> .s <sup>-1</sup> | 24 s <sup>-1</sup>     | 6 s <sup>-1</sup>       | 15.657 uM   | 6 s <sup>-1</sup>       | 4     |
| MAPKK-ser ---PPHosphatase2A--> MAPKK             | 3.1935e-06 # <sup>-1</sup> .s <sup>-1</sup> | 24 s <sup>-1</sup>     | 6 s <sup>-1</sup>       | 15.657 uM   | 6 s <sup>-1</sup>       | 4     |

|                                                   |                      |            |            |              |            |        |
|---------------------------------------------------|----------------------|------------|------------|--------------|------------|--------|
| craf-1_star_star ---PPhosphatase2A--> craf-1_star | 3.1935e-06 #^-1.s^-1 | 24 s^-1    | 6 s^-1     | 15.657 uM    | 6 s^-1     | 4      |
| ppRSK ---PDK1--> active_RSK2                      | 8.3333e-07 #^-1.s^-1 | 4 s^-1     | 1 s^-1     | 10 uM        | 1 s^-1     | 4      |
| active_RSK2 ---PP2A--> ppRSK                      | 9.4692e-07 #^-1.s^-1 | 4 s^-1     | 1 s^-1     | 8.8005 uM    | 1 s^-1     | 4      |
| I1_star ---PP2A--> I1                             | 6.6e-06 #^-1.s^-1    | 25 s^-1    | 6 s^-1     | 7.8283 uM    | 6 s^-1     | 4.1667 |
| CaMKKp ---PP2A--> CaMKK_c                         | 1.1667e-06 #^-1.s^-1 | 2.8 s^-1   | 0.7 s^-1   | 4.9999 uM    | 0.7 s^-1   | 4      |
| pCaMKIV_CaM_Ca_c ---PP2A--> CaMKIV_CaM_Ca_c       | 1.8939e-06 #^-1.s^-1 | 8 s^-1     | 2 s^-1     | 8.8002 uM    | 2 s^-1     | 4      |
| pRSK ---PP2A--> RSK                               | 9.4692e-07 #^-1.s^-1 | 4 s^-1     | 1 s^-1     | 8.8005 uM    | 1 s^-1     | 4      |
| PP1-I1_star ---PP2A--> PP1-I1                     | 6.6e-06 #^-1.s^-1    | 25 s^-1    | 6 s^-1     | 7.8283 uM    | 6 s^-1     | 4.1667 |
| pCREB_CRE ---PP1_active_n--> CREB_CRE             | 4.5045e-06 #^-1.s^-1 | 4 s^-1     | 1 s^-1     | 5 uM         | 1 s^-1     | 4      |
| CREB_CRE ---active_RSK2_n--> pCREB_CRE            | 4.5045e-07 #^-1.s^-1 | 0.4 s^-1   | 0.1 s^-1   | 5 uM         | 0.1 s^-1   | 4      |
| I1_star ---CaNAB-Ca4--> I1                        | 5.7e-08 #^-1.s^-1    | 0.136 s^-1 | 0.034 s^-1 | 4.9708 uM    | 0.034 s^-1 | 4      |
| CREB_CRE ---pMSK1_n--> pCREB_CRE                  | 1.1261e-06 #^-1.s^-1 | 0.4 s^-1   | 0.1 s^-1   | 2 uM         | 0.1 s^-1   | 4      |
| pMSK1_n ---PP2An--> MSK1_n                        | 2.5594e-06 #^-1.s^-1 | 4 s^-1     | 1 s^-1     | 8.7999 uM    | 1 s^-1     | 4      |
| I1_star_n ---PP2An--> I1n                         | 1.7262e-05 #^-1.s^-1 | 24 s^-1    | 6 s^-1     | 7.8285 uM    | 6 s^-1     | 4      |
| PLC_g ---PLCg_basal--> PLC_g_star                 | 1.3889e-05 #^-1.s^-1 | 2 s^-1     | 0.5 s^-1   | 0.3 uM       | 0.5 s^-1   | 4      |
| Nucleotides ---Basal_transcription--> mRNA_clx    | 1.0416e-06 #^-1.s^-1 | 0.2 s^-1   | 0.05 s^-1  | 1.0812 uM    | 0.05 s^-1  | 4      |
| CREB_CRE ---pCaMKIV_CaM_Ca_nuc--> pCREB_CRE       | 2.8665e-06 #^-1.s^-1 | 2.8 s^-1   | 0.7 s^-1   | 5.5 uM       | 0.7 s^-1   | 4      |
| GDP-Ras ---Shc_star.Sos.Grb2--> GTP-Ras           | 3.3e-05 #^-1.s^-1    | 0.8 s^-1   | 0.2 s^-1   | 0.050505 uM  | 0.2 s^-1   | 4      |
| Rap1GDP ---CRK_C3G_Cbl_star_clx--> Rap1GTP        | 6.6668e-05 #^-1.s^-1 | 0.2 s^-1   | 0.2 s^-1   | 0.0099998 uM | 0.2 s^-1   | 1      |
| Cbl ---Src_star--> Cbl_star                       | 0.00066665 #^-1.s^-1 | 160 s^-1   | 40 s^-1    | 0.50001 uM   | 40 s^-1    | 4      |
| MSK1_n ---MAPK_star_n--> pMSK1_n                  | 4.2496e-07 #^-1.s^-1 | 0.4 s^-1   | 0.1 s^-1   | 5.2999 uM    | 0.1 s^-1   | 4      |
| Sos ---MAPK_star--> Sos_star                      | 3.2552e-05 #^-1.s^-1 | 40 s^-1    | 10 s^-1    | 2.56 uM      | 10 s^-1    | 4      |
| RSK ---MAPK_star--> pRSK                          | 2.673e-06 #^-1.s^-1  | 6.8 s^-1   | 1.7 s^-1   | 5.2999 uM    | 1.7 s^-1   | 4      |
| craf-1_star ---MAPK_star--> craf-1_star_star      | 3.25e-06 #^-1.s^-1   | 40 s^-1    | 10 s^-1    | 25.641 uM    | 10 s^-1    | 4      |
| Nucleotides ---Transcription_clx--> mRNA_clx      | 1.0427e-06 #^-1.s^-1 | 0.2 s^-1   | 0.05 s^-1  | 1.08 uM      | 0.05 s^-1  | 4      |
| TORC1c ---SIK2--> pTORC1                          | 8.3333e-07 #^-1.s^-1 | 1.6 s^-1   | 0.4 s^-1   | 4 uM         | 0.4 s^-1   | 4      |
| I1_star ---CaM_Ca_n-CaNAB--> I1                   | 5.7e-07 #^-1.s^-1    | 1.36 s^-1  | 0.34 s^-1  | 4.9708 uM    | 0.34 s^-1  | 4      |
| pTORC1 ---CaM_Ca_n-CaNAB--> TORC1c                | 2.0833e-06 #^-1.s^-1 | 0.4 s^-1   | 0.1 s^-1   | 0.40001 uM   | 0.1 s^-1   | 4      |
| PP1-I1_star ---CaM_Ca_n-CaNAB--> PP1-I1           | 5.7e-07 #^-1.s^-1    | 1.36 s^-1  | 0.34 s^-1  | 4.9708 uM    | 0.34 s^-1  | 4      |

Pools for group /kinetics

| name           | InitialConc | buffered | Volume  |
|----------------|-------------|----------|---------|
| CaM-Ca4        | 0 uM        | 0        | 1000 fl |
| PKC-active     | 0.01 uM     | 1        | 1000 fl |
| PKA-active     | 0 uM        | 0        | 1000 fl |
| cAMP           | 0 uM        | 0        | 1000 fl |
| PKA-active_n   | 0 uM        | 0        | 370 fl  |
| Ca             | 0.08 uM     | 0        | 1000 fl |
| Src            | 0.02 uM     | 0        | 1000 fl |
| Cbl            | 0.5 uM      | 0        | 1000 fl |
| C3G            | 0.5 uM      | 0        | 1000 fl |
| CRK            | 1 uM        | 0        | 1000 fl |
| CRK_C3G        | 0 uM        | 0        | 1000 fl |
| Rap1GTP        | 0 uM        | 0        | 1000 fl |
| Rap1GDP        | 0.2 uM      | 0        | 1000 fl |
| Rap1GAP        | 0.012 uM    | 0        | 1000 fl |
| bRaf_Rap1GTP   | 0 uM        | 0        | 1000 fl |
| bRaf           | 0.2 uM      | 0        | 1000 fl |
| MKP-1          | 0.015 uM    | 0        | 1000 fl |
| PPhosphatase2A | 1 uM        | 0        | 1000 fl |
| MSK1_n         | 0.2 uM      | 0        | 370 fl  |
| PDK1           | 1 uM        | 0        | 1000 fl |
| PP2A           | 0.15 uM     | 1        | 1000 fl |
| PP1_active_n   | 0 uM        | 0        | 370 fl  |
| ppRSK          | 0 uM        | 0        | 1000 fl |
| active_RSK2    | 0 uM        | 0        | 1000 fl |

|                      |           |   |           |
|----------------------|-----------|---|-----------|
| active_RSK2_n        | 0 uM      | 0 | 370 fl    |
| RSK                  | 0.2 uM    | 0 | 1000 fl   |
| pRSK                 | 0 uM      | 0 | 1000 fl   |
| BetaGamma            | 0 uM      | 0 | 1000 fl   |
| CaNAB-Ca4            | 0 uM      | 0 | 1000 fl   |
| PP1-active_c         | 1.8 uM    | 0 | 1000 fl   |
| pMSK1_n              | 0 uM      | 0 | 370 fl    |
| Ca_input             | 0 uM      | 0 | 1000 fl   |
| PP2An                | 0.1 uM    | 0 | 370 fl    |
| BDNF                 | 5e-05 uM  | 1 | 999.97 fl |
| PLC_g                | 0.1 uM    | 0 | 1000 fl   |
| PLCg_basal           | 0.0007 uM | 0 | 1000 fl   |
| Grb2                 | 1 uM      | 0 | 1000 fl   |
| Shc                  | 0.5 uM    | 0 | 1000 fl   |
| Sos                  | 0.1 uM    | 0 | 1000 fl   |
| Sos.Grb2             | 0 uM      | 0 | 1000 fl   |
| CBP                  | 0.5 uM    | 0 | 370 fl    |
| mRNA_clx             | 0 uM      | 0 | 370 fl    |
| Basal_transcription  | 5e-05 uM  | 0 | 370 fl    |
| mRNA                 | 0 uM      | 0 | 370 fl    |
| degraded_mRNA        | 0 uM      | 1 | 370 fl    |
| CREB_CRE             | 0.5 uM    | 0 | 370 fl    |
| pCREB_CRE            | 0 uM      | 0 | 370 fl    |
| Basal_CaMKIV         | 0.0005 uM | 0 | 1000 fl   |
| pCaMKIV_CaM_Ca_nuc   | 0 uM      | 0 | 370 fl    |
| pCaMKIV_CaM_Ca_n     | 0 uM      | 0 | 370 fl    |
| Basal_CaMKIV_n       | 5e-05 uM  | 0 | 370 fl    |
| Sum_total_CaMKIV     | 0 uM      | 0 | 1000 fl   |
| MAPK_active_total    | 0 uM      | 0 | 1000 fl   |
| Basal_MAPK_active    | 0.0001 uM | 0 | 1000 fl   |
| Shc_star             | 0 uM      | 0 | 1000 fl   |
| PLC_g_star           | 0 uM      | 0 | 1000 fl   |
| Sos_star             | 0 uM      | 0 | 1000 fl   |
| Shc_star.Sos.Grb2    | 0 uM      | 0 | 1000 fl   |
| Sos_star.Grb2        | 0 uM      | 0 | 1000 fl   |
| CRK_C3G_Cbl_star_clx | 0 uM      | 0 | 1000 fl   |
| Cbl_star             | 0 uM      | 0 | 1000 fl   |
| Src_star             | 0 uM      | 0 | 1000 fl   |
| MAPK_star_n          | 0 uM      | 0 | 370 fl    |
| MAPK_star            | 0 uM      | 0 | 1000 fl   |
| pTORC1               | 0 uM      | 0 | 1000 fl   |
| TORC1n               | 0 uM      | 0 | 370 fl    |
| TORC1c               | 0.1 uM    | 0 | 1000 fl   |
| CBP_pCREB_CRE        | 0 uM      | 0 | 370 fl    |
| Transcription_clx    | 0 uM      | 0 | 370 fl    |
| Nucleotides          | 0.2 uM    | 1 | 369.98 fl |
| SIK2                 | 0.5 uM    | 0 | 1000 fl   |
| SIK2_star            | 0 uM      | 0 | 1000 fl   |
| PP1-I1n              | 0 uM      | 0 | 370 fl    |
| I1n                  | 0 uM      | 0 | 370 fl    |
| I1_star_n            | 0 uM      | 0 | 369.98 fl |
| CaM_Ca_n-CaNAB       | 0 uM      | 0 | 1000 fl   |

-----

CaMKIV sub-model

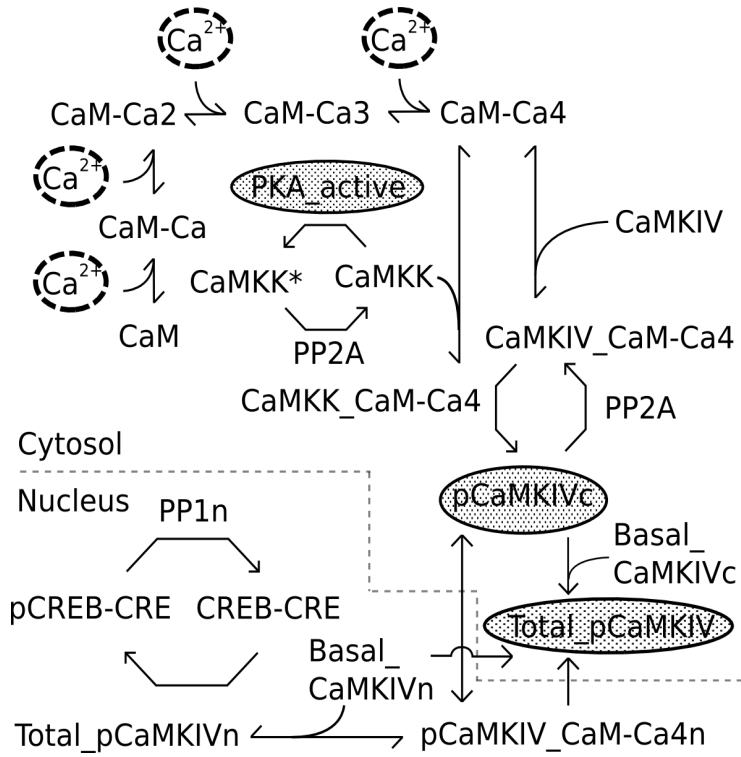

Equations for group /kinetics/CaM

Reactions for group /kinetics/CaM

| Reaction                    | kf                   | kb          | Kf                 | Kb          |
|-----------------------------|----------------------|-------------|--------------------|-------------|
| CaM-Ca3 + Ca <====> CaM-Ca4 | 7.7501e-07 #^-1.s^-1 | 10 s^-1     | 0.46501 uM^-1.s^-1 | 10 s^-1     |
| CaM + Ca <====> CaM-Ca      | 1.4141e-05 #^-1.s^-1 | 8.4853 s^-1 | 8.4846 uM^-1.s^-1  | 8.4853 s^-1 |
| CaM-Ca2 + Ca <====> CaM-Ca3 | 6.0001e-06 #^-1.s^-1 | 10 s^-1     | 3.6001 uM^-1.s^-1  | 10 s^-1     |
| CaM-Ca + Ca <====> CaM-Ca2  | 1.4141e-05 #^-1.s^-1 | 8.4853 s^-1 | 8.4846 uM^-1.s^-1  | 8.4853 s^-1 |

Pools for group /kinetics/CaM

| name    | InitialConc | buffered | Volume  |
|---------|-------------|----------|---------|
| CaM     | 20 uM       | 0        | 1000 fl |
| CaM-Ca3 | 0 uM        | 0        | 1000 fl |
| CaM-Ca2 | 0 uM        | 0        | 1000 fl |
| CaM-Ca  | 0 uM        | 0        | 1000 fl |

Equations for group /kinetics/camkiv

Reactions for group /kinetics/camkiv

| Reaction                                 | kf                 | kb        | Kf                 | Kb        |
|------------------------------------------|--------------------|-----------|--------------------|-----------|
| CaM-Ca4 + CaMKIVc <====> CaMKIV_CaM_Ca_c | 2.22e-08 #^-1.s^-1 | 0.01 s^-1 | 0.01332 uM^-1.s^-1 | 0.01 s^-1 |



|                                                 |                     |              |                   |              |
|-------------------------------------------------|---------------------|--------------|-------------------|--------------|
| PKA-active + R2C1 <====> R2C2                   | 0.0013317 #^-1.s^-1 | 0.186 s^-1   | 799.02 uM^-1.s^-1 | 0.186 s^-1   |
| PKA-active + PKA-inhibitor <====> inhibited-PKA | 0.0001 #^-1.s^-1    | 1 s^-1       | 60 uM^-1.s^-1     | 1 s^-1       |
| PKA-active <====> PKA-active_n                  | 0.000305 s^-1       | 0.00125 s^-1 | 0.000305 s^-1     | 0.00125 s^-1 |

Pools for group /kinetics/PKA

| name          | InitialConc | buffered | Volume  |
|---------------|-------------|----------|---------|
| R2C2          | 0.5 uM      | 0        | 1000 fl |
| R2C2-cAMP     | 0 uM        | 0        | 1000 fl |
| R2C2-cAMP2    | 0 uM        | 0        | 1000 fl |
| R2C2-cAMP3    | 0 uM        | 0        | 1000 fl |
| R2C2-cAMP4    | 0 uM        | 0        | 1000 fl |
| R2C-cAMP4     | 0 uM        | 0        | 1000 fl |
| R2-cAMP4      | 0 uM        | 0        | 1000 fl |
| R2            | 0 uM        | 0        | 1000 fl |
| R2C1          | 0 uM        | 0        | 1000 fl |
| inhibited-PKA | 0 uM        | 0        | 1000 fl |
| PKA-inhibitor | 0.25 uM     | 0        | 1000 fl |

Equations for group /kinetics/AC

Reactions for group /kinetics/AC

| Reaction                       | kf                   | kb     | Kf             | Kb     |
|--------------------------------|----------------------|--------|----------------|--------|
| CaM-Ca4 + AC1 <====> AC1-CaM   | 8.3333e-05 #^-1.s^-1 | 1 s^-1 | 50 uM^-1.s^-1  | 1 s^-1 |
| AC2_star <====> AC2            | 0.1 s^-1             | 0 s^-1 | 0.1 s^-1       | 0 s^-1 |
| cAMP-PDE_star <====> cAMP-PDE  | 0.1 s^-1             | 0 s^-1 | 0.1 s^-1       | 0 s^-1 |
| PDE1 + CaM-Ca4 <====> CaM.PDE1 | 0.0012 #^-1.s^-1     | 5 s^-1 | 720 uM^-1.s^-1 | 5 s^-1 |

Enzymes for group /kinetics/AC

| Enzyme-reaction              | k1                | k2        | k3         | Km        | kcat       | ratio  |
|------------------------------|-------------------|-----------|------------|-----------|------------|--------|
| ATP ---AC1-CaM--> cAMP       | 7.5e-06 #^-1.s^-1 | 72 s^-1   | 18 s^-1    | 20 uM     | 18 s^-1    | 4      |
| cAMP ---cAMP-PDE--> AMP      | 4.2e-06 #^-1.s^-1 | 40 s^-1   | 10 s^-1    | 19.841 uM | 10 s^-1    | 4      |
| cAMP ---PDE1--> AMP          | 3.5e-07 #^-1.s^-1 | 6.67 s^-1 | 1.667 s^-1 | 39.7 uM   | 1.667 s^-1 | 4.0012 |
| cAMP ---CaM.PDE1--> AMP      | 2.1e-06 #^-1.s^-1 | 40 s^-1   | 10 s^-1    | 39.683 uM | 10 s^-1    | 4      |
| ATP ---AC2_star--> cAMP      | 2.9e-06 #^-1.s^-1 | 28 s^-1   | 7 s^-1     | 20.115 uM | 7 s^-1     | 4      |
| cAMP ---cAMP-PDE_star--> AMP | 8.4e-06 #^-1.s^-1 | 80 s^-1   | 20 s^-1    | 19.841 uM | 20 s^-1    | 4      |

Pools for group /kinetics/AC

| name          | InitialConc   | buffered | Volume       |
|---------------|---------------|----------|--------------|
| ATP           | 5000 uM       | 1        | 1000 fl      |
| AC1-CaM       | 0 uM          | 0        | 1000 fl      |
| AC1           | 0.02 uM       | 0        | 1000 fl      |
| AC2           | 0.015 uM      | 0        | 1000 fl      |
| AMP           | 3.2549e+05 uM | 0        | 0.0016667 fl |
| cAMP-PDE      | 0.45 uM       | 0        | 1000 fl      |
| PDE1          | 2 uM          | 0        | 1000 fl      |
| CaM.PDE1      | 0 uM          | 0        | 1000 fl      |
| AC2_star      | 0 uM          | 0        | 1000 fl      |
| cAMP-PDE_star | 0 uM          | 0        | 1000 fl      |

MAPK sub-model

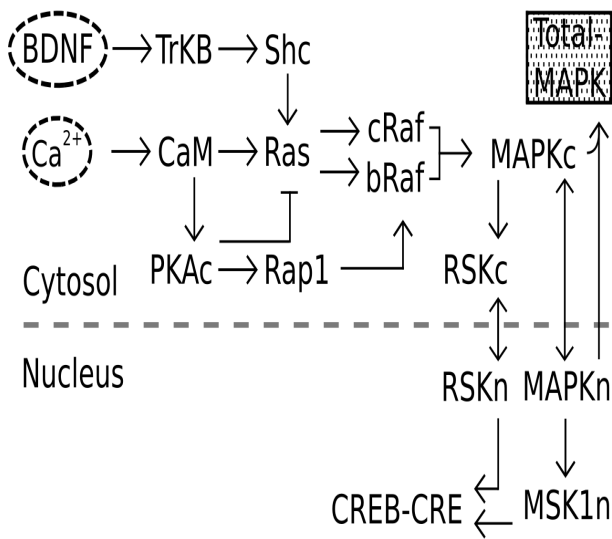

Equations for group /kinetics/MAPK

Reactions for group /kinetics/MAPK

| Reaction                                   | kf                   | kb       | Kf                | Kb       |
|--------------------------------------------|----------------------|----------|-------------------|----------|
| craf-1 + GTP-Ras <=> Raf-GTP-Ras           | 1e-05 #^-1.s^-1      | 1 s^-1   | 6 uM^-1.s^-1      | 1 s^-1   |
| craf-1_star + GTP-Ras <=> Raf_star-GTP-Ras | 1.6666e-05 #^-1.s^-1 | 0.5 s^-1 | 9.9996 uM^-1.s^-1 | 0.5 s^-1 |
| bRaf + GTP-Ras <=> braf-GTP-Ras            | 0.0001 #^-1.s^-1     | 0.5 s^-1 | 60 uM^-1.s^-1     | 0.5 s^-1 |

Enzymes for group /kinetics/MAPK

| Enzyme-reaction                             | k1                   | k2       | k3       | Km          | kcat     | ratio |
|---------------------------------------------|----------------------|----------|----------|-------------|----------|-------|
| MAPKK ---Raf-GTP-Ras--> MAPKK-ser           | 1.5714e-05 #^-1.s^-1 | 1.2 s^-1 | 0.3 s^-1 | 0.15909 uM  | 0.3 s^-1 | 4     |
| MAPKK-ser ---Raf-GTP-Ras--> MAPKK_star      | 1.5714e-05 #^-1.s^-1 | 1.2 s^-1 | 0.3 s^-1 | 0.15909 uM  | 0.3 s^-1 | 4     |
| MAPKK-ser ---braf-GTP-Ras--> MAPKK_star     | 1.0417e-05 #^-1.s^-1 | 0.8 s^-1 | 0.2 s^-1 | 0.15999 uM  | 0.2 s^-1 | 4     |
| MAPKK ---braf-GTP-Ras--> MAPKK-ser          | 1.0417e-05 #^-1.s^-1 | 0.8 s^-1 | 0.2 s^-1 | 0.15999 uM  | 0.2 s^-1 | 4     |
| MAPKK-ser ---Raf_star-GTP-Ras--> MAPKK_star | 1.5714e-05 #^-1.s^-1 | 1.2 s^-1 | 0.3 s^-1 | 0.15909 uM  | 0.3 s^-1 | 4     |
| MAPKK ---Raf_star-GTP-Ras--> MAPKK-ser      | 1.5714e-05 #^-1.s^-1 | 1.2 s^-1 | 0.3 s^-1 | 0.15909 uM  | 0.3 s^-1 | 4     |
| MAPK ---MAPKK_star--> MAPK-tyr              | 5.4e-05 #^-1.s^-1    | 1.2 s^-1 | 0.3 s^-1 | 0.046296 uM | 0.3 s^-1 | 4     |
| MAPK-tyr ---MAPKK_star--> MAPK_star         | 5.4e-05 #^-1.s^-1    | 1.2 s^-1 | 0.3 s^-1 | 0.046296 uM | 0.3 s^-1 | 4     |

Pools for group /kinetics/MAPK

| name             | InitialConc | buffered | Volume  |
|------------------|-------------|----------|---------|
| craf-1           | 0.2 uM      | 0        | 1000 fl |
| MAPKK            | 0.18 uM     | 0        | 1000 fl |
| MAPK             | 0.36 uM     | 0        | 1000 fl |
| MAPK-tyr         | 0 uM        | 0        | 1000 fl |
| MAPKK-ser        | 0 uM        | 0        | 1000 fl |
| Raf-GTP-Ras      | 0 uM        | 0        | 1000 fl |
| braf-GTP-Ras     | 0 uM        | 0        | 1000 fl |
| craf-1_star      | 0 uM        | 0        | 1000 fl |
| craf-1_star_star | 0 uM        | 0        | 1000 fl |
| Raf_star-GTP-Ras | 0 uM        | 0        | 1000 fl |
| MAPKK_star       | 0 uM        | 0        | 1000 fl |

-----



Equations for group /kinetics/Ras

Reactions for group /kinetics/Ras

| Reaction                                  | kf               | kb     | Kf            | Kb     |
|-------------------------------------------|------------------|--------|---------------|--------|
| BetaGamma + inact-GEF <====> GEF-Gprot-bg | 1e-05 #^-1.s^-1  | 1 s^-1 | 6 uM^-1.s^-1  | 1 s^-1 |
| GEF_star <====> inact-GEF                 | 1 s^-1           | 0 s^-1 | 1 s^-1        | 0 s^-1 |
| GTP-Ras <====> GDP-Ras                    | 0.0001 s^-1      | 0 s^-1 | 0.0001 s^-1   | 0 s^-1 |
| GAP_star <====> GAP                       | 0.1 s^-1         | 0 s^-1 | 0.1 s^-1      | 0 s^-1 |
| inact-GEF + CaM-Ca4 <====> CaM-GEF        | 0.0001 #^-1.s^-1 | 1 s^-1 | 60 uM^-1.s^-1 | 1 s^-1 |
| inact-GEF_star <====> inact-GEF           | 1 s^-1           | 0 s^-1 | 1 s^-1        | 0 s^-1 |

Enzymes for group /kinetics/Ras

| Enzyme-reaction                    | k1                   | k2        | k3        | Km         | kcat      | ratio |
|------------------------------------|----------------------|-----------|-----------|------------|-----------|-------|
| GDP-Ras ---GEF-Gprot-bg--> GTP-Ras | 3.3e-07 #^-1.s^-1    | 0.08 s^-1 | 0.02 s^-1 | 0.50505 uM | 0.02 s^-1 | 4     |
| GTP-Ras ---GAP--> GDP-Ras          | 8.2476e-05 #^-1.s^-1 | 40 s^-1   | 10 s^-1   | 1.0104 uM  | 10 s^-1   | 4     |
| GDP-Ras ---CaM-GEF--> GTP-Ras      | 3.3e-07 #^-1.s^-1    | 0.08 s^-1 | 0.02 s^-1 | 0.50505 uM | 0.02 s^-1 | 4     |
| GDP-Ras ---GEF_star--> GTP-Ras     | 3.3e-07 #^-1.s^-1    | 0.08 s^-1 | 0.02 s^-1 | 0.50505 uM | 0.02 s^-1 | 4     |

Pools for group /kinetics/Ras

| name           | InitialConc | buffered | Volume  |
|----------------|-------------|----------|---------|
| GEF-Gprot-bg   | 0 uM        | 0        | 1000 fl |
| inact-GEF      | 0.1 uM      | 0        | 1000 fl |
| GTP-Ras        | 0 uM        | 0        | 1000 fl |
| GDP-Ras        | 0.5 uM      | 0        | 1000 fl |
| GAP            | 0.01 uM     | 0        | 1000 fl |
| CaM-GEF        | 0 uM        | 0        | 1000 fl |
| GEF_star       | 0 uM        | 0        | 1000 fl |
| inact-GEF_star | 0 uM        | 0        | 1000 fl |
| GAP_star       | 0 uM        | 0        | 1000 fl |

Equations for group /kinetics/PP1

Reactions for group /kinetics/PP1

| Reaction                                  | kf                   | kb          | Kf                | Kb           |
|-------------------------------------------|----------------------|-------------|-------------------|--------------|
| I1_star + PP1-active_c <====> PP1-I1_star | 0.00083329 #^-1.s^-1 | 0.1 s^-1    | 499.97 uM^-1.s^-1 | 0.1 s^-1     |
| PP1-I1 <====> PP1-active_c + I1           | 1 s^-1               | 0 #^-1.s^-1 | 1 s^-1            | 0 uM^-1.s^-1 |

Pools for group /kinetics/PP1

| name        | InitialConc | buffered | Volume  |
|-------------|-------------|----------|---------|
| I1          | 1.8 uM      | 0        | 1000 fl |
| PP1-I1      | 0 uM        | 0        | 1000 fl |
| I1_star     | 0.001 uM    | 0        | 1000 fl |
| PP1-I1_star | 0 uM        | 0        | 1000 fl |

Equations for group /kinetics/PP2B

Reactions for group /kinetics/PP2B

| Reaction                                 | kf                   | kb     | Kf                | Kb     |
|------------------------------------------|----------------------|--------|-------------------|--------|
| 2 Ca + CaNAB-Ca2 <====> CaNAB-Ca4        | 9.9998e-12 #^-2.s^-1 | 1 s^-1 | 3.5999 uM^-2.s^-1 | 1 s^-1 |
| CaNAB + 2 Ca <====> CaNAB-Ca2            | 2.7801e-08 #^-2.s^-1 | 1 s^-1 | 10008 uM^-2.s^-1  | 1 s^-1 |
| CaNAB-Ca4 + CaM-Ca2 <====> CaM-Ca2-CANAB | 4e-07 #^-1.s^-1      | 1 s^-1 | 0.24 uM^-1.s^-1   | 1 s^-1 |

|                                         |                    |        |                  |        |
|-----------------------------------------|--------------------|--------|------------------|--------|
| CaNAB-Ca4 + CaM-Ca3 <====> CaMca3-CaNAB | 3.73e-06 #^-1.s^-1 | 1 s^-1 | 2.238 uM^-1.s^-1 | 1 s^-1 |
| CaM-Ca4 + CaNAB-Ca4 <====> CaMca4-CaNAB | 0.001 #^-1.s^-1    | 1 s^-1 | 600 uM^-1.s^-1   | 1 s^-1 |

Pools for group /kinetics/PP2B

| name         | InitialConc | buffered | Volume  |
|--------------|-------------|----------|---------|
| CaNAB        | 1 uM        | 0        | 1000 fl |
| CaNAB-Ca2    | 0 uM        | 0        | 1000 fl |
| CaMca3-CaNAB | 0 uM        | 0        | 1000 fl |
| CaMca2-CaNAB | 0 uM        | 0        | 1000 fl |
| CaMca4-CaNAB | 0 uM        | 0        | 1000 fl |

BDNF receptor submodel

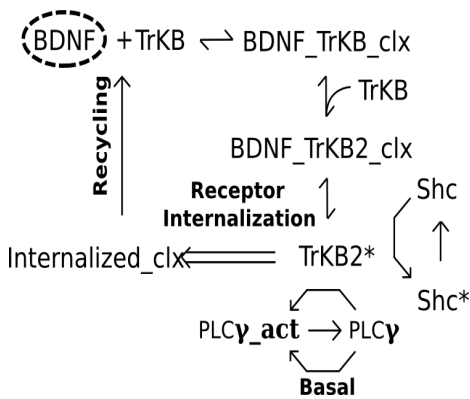

Equations for group /kinetics/TrkB\_mod

Reactions for group /kinetics/TrkB\_mod

| Reaction                                             | kf                   | kb          | Kf                 | Kb           |
|------------------------------------------------------|----------------------|-------------|--------------------|--------------|
| BDNF_TrkB2_clx <====> BDNF_TrkB2_star_clx            | 0.02 s^-1            | 0 s^-1      | 0.02 s^-1          | 0 s^-1       |
| BDNF_TrkB_clx + TrkB <====> BDNF_TrkB2_clx           | 1.6667e-06 #^-1.s^-1 | 0.02 s^-1   | 0.99999 uM^-1.s^-1 | 0.02 s^-1    |
| TrkB + BDNF <====> BDNF_TrkB_clx                     | 1.6668e-06 #^-1.s^-1 | 0.05 s^-1   | 1 uM^-1.s^-1       | 0.05 s^-1    |
| BDNF_TrkB2_star_clx <====> 2 Int_BDNF_TrkB2_star_clx | 0.01 s^-1            | 0 #^-1.s^-1 | 0.01 s^-1          | 0 uM^-1.s^-1 |
| Int_BDNF_TrkB2_star_clx <====> TrkB                  | 0.001 s^-1           | 0.001 s^-1  | 0.001 s^-1         | 0.001 s^-1   |
| PLC_g_star <====> PLC_g                              | 0.07 s^-1            | 0 s^-1      | 0.07 s^-1          | 0 s^-1       |

Enzymes for group /kinetics/TrkB\_mod

| Enzyme-reaction                            | k1                   | k2       | k3       | Km         | kcat     | ratio |
|--------------------------------------------|----------------------|----------|----------|------------|----------|-------|
| PLC_g ---BDNF_TrkB2_star_clx--> PLC_g_star | 1.3889e-05 #^-1.s^-1 | 2 s^-1   | 0.5 s^-1 | 0.30001 uM | 0.5 s^-1 | 4     |
| Shc ---BDNF_TrkB2_star_clx--> Shc_star     | 3.0003e-06 #^-1.s^-1 | 1.2 s^-1 | 0.3 s^-1 | 0.83328 uM | 0.3 s^-1 | 4     |

Pools for group /kinetics/TrkB\_mod

| name                    | InitialConc | buffered | Volume    |
|-------------------------|-------------|----------|-----------|
| TrkB                    | 0.25 uM     | 0        | 999.93 fl |
| BDNF_TrkB2_clx          | 0 uM        | 0        | 999.97 fl |
| BDNF_TrkB_clx           | 0 uM        | 0        | 999.93 fl |
| BDNF_TrkB2_star_clx     | 0 uM        | 0        | 999.97 fl |
| Int_BDNF_TrkB2_star_clx | 0.25 uM     | 1        | 1000 fl   |

Same data

Equations for group ###[]

Reactions for group ###[]

sorting by data type:

| Reaction                                        | kf                                          | kb                                          | Kf                                        | Kb                                       |
|-------------------------------------------------|---------------------------------------------|---------------------------------------------|-------------------------------------------|------------------------------------------|
| Src_star <====> Src                             | 100 s <sup>-1</sup>                         | 0.1 s <sup>-1</sup>                         | 100 s <sup>-1</sup>                       | 0.1 s <sup>-1</sup>                      |
| Cbl_star <====> Cbl                             | 10 s <sup>-1</sup>                          | 0.01 s <sup>-1</sup>                        | 10 s <sup>-1</sup>                        | 0.01 s <sup>-1</sup>                     |
| C3G + CRK <====> CRK_C3G                        | 1.6667e-06 # <sup>-1</sup> .s <sup>-1</sup> | 0.002 s <sup>-1</sup>                       | 1 uM <sup>-1</sup> .s <sup>-1</sup>       | 0.002 s <sup>-1</sup>                    |
| Rap1GTP <====> Rap1GDP                          | 0.0001 s <sup>-1</sup>                      | 0 s <sup>-1</sup>                           | 0.0001 s <sup>-1</sup>                    | 0 s <sup>-1</sup>                        |
| Rap1GTP + bRaf <====> bRaf_Rap1GTP              | 0.0001 # <sup>-1</sup> .s <sup>-1</sup>     | 0.5 s <sup>-1</sup>                         | 60 uM <sup>-1</sup> .s <sup>-1</sup>      | 0.5 s <sup>-1</sup>                      |
| MAPK_star <====> MAPK_star_n                    | 0.0001 s <sup>-1</sup>                      | 0.003 s <sup>-1</sup>                       | 0.0001 s <sup>-1</sup>                    | 0.003 s <sup>-1</sup>                    |
| active_RSK2 <====> active_RSK2_n                | 0.001 s <sup>-1</sup>                       | 0.005 s <sup>-1</sup>                       | 0.001 s <sup>-1</sup>                     | 0.005 s <sup>-1</sup>                    |
| pRSK <====> ppRSK                               | 0.1 s <sup>-1</sup>                         | 10 s <sup>-1</sup>                          | 0.1 s <sup>-1</sup>                       | 10 s <sup>-1</sup>                       |
| Ca_input <====> Ca                              | 100 s <sup>-1</sup>                         | 100 s <sup>-1</sup>                         | 100 s <sup>-1</sup>                       | 100 s <sup>-1</sup>                      |
| Grb2 + Sos <====> Sos.Grb2                      | 4.1667e-07 # <sup>-1</sup> .s <sup>-1</sup> | 0.0168 s <sup>-1</sup>                      | 0.25 uM <sup>-1</sup> .s <sup>-1</sup>    | 0.0168 s <sup>-1</sup>                   |
| Sos.Grb2 + Shc_star <====> Shc_star.Sos.Grb2    | 8.3333e-06 # <sup>-1</sup> .s <sup>-1</sup> | 0.1 s <sup>-1</sup>                         | 5 uM <sup>-1</sup> .s <sup>-1</sup>       | 0.1 s <sup>-1</sup>                      |
| Sos_star <====> Sos                             | 0.001 s <sup>-1</sup>                       | 0.1 s <sup>-1</sup>                         | 0.001 s <sup>-1</sup>                     | 0.1 s <sup>-1</sup>                      |
| CBP + pCREB_CRE <====> CBP_pCREB_CRE            | 5.1351e-07 # <sup>-1</sup> .s <sup>-1</sup> | 0.025 s <sup>-1</sup>                       | 0.114 uM <sup>-1</sup> .s <sup>-1</sup>   | 0.025 s <sup>-1</sup>                    |
| mRNA_clx <====> mRNA                            | 1.44 s <sup>-1</sup>                        | 0.0001 s <sup>-1</sup>                      | 1.44 s <sup>-1</sup>                      | 0.0001 s <sup>-1</sup>                   |
| mRNA <====> degraded_mRNA                       | 1 s <sup>-1</sup>                           | 0 s <sup>-1</sup>                           | 1 s <sup>-1</sup>                         | 0 s <sup>-1</sup>                        |
| Cbl_star + CRK_C3G <====> CRK_C3G_Cbl_star_clx  | 1.6667e-06 # <sup>-1</sup> .s <sup>-1</sup> | 0.2 s <sup>-1</sup>                         | 1 uM <sup>-1</sup> .s <sup>-1</sup>       | 0.2 s <sup>-1</sup>                      |
| Grb2 + Sos_star <====> Sos_star.Grb2            | 4.1667e-08 # <sup>-1</sup> .s <sup>-1</sup> | 0.0168 s <sup>-1</sup>                      | 0.025 uM <sup>-1</sup> .s <sup>-1</sup>   | 0.0168 s <sup>-1</sup>                   |
| TORC1c <====> TORC1n                            | 0.01 s <sup>-1</sup>                        | 0.001 s <sup>-1</sup>                       | 0.01 s <sup>-1</sup>                      | 0.001 s <sup>-1</sup>                    |
| TORC1n + CBP_pCREB_CRE <====> Transcription_clx | 4.5045e-06 # <sup>-1</sup> .s <sup>-1</sup> | 0.1 s <sup>-1</sup>                         | 1 uM <sup>-1</sup> .s <sup>-1</sup>       | 0.1 s <sup>-1</sup>                      |
| SIK2_star <====> SIK2                           | 0.1 s <sup>-1</sup>                         | 0 s <sup>-1</sup>                           | 0.1 s <sup>-1</sup>                       | 0 s <sup>-1</sup>                        |
| PP1-I1n <====> PP1_active_n + I1n               | 1 s <sup>-1</sup>                           | 9.009e-06 # <sup>-1</sup> .s <sup>-1</sup>  | 1 s <sup>-1</sup>                         | 2 uM <sup>-1</sup> .s <sup>-1</sup>      |
| PP1-I1 <====> PP1-I1n                           | 0.003 s <sup>-1</sup>                       | 0.003 s <sup>-1</sup>                       | 0.003 s <sup>-1</sup>                     | 0.003 s <sup>-1</sup>                    |
| PP1_active_n + I1n <====> PP1-I1n               | 2.2521e-06 # <sup>-1</sup> .s <sup>-1</sup> | 0.1 s <sup>-1</sup>                         | 0.49997 uM <sup>-1</sup> .s <sup>-1</sup> | 0.1 s <sup>-1</sup>                      |
| Shc_star <====> Shc                             | 0.2 s <sup>-1</sup>                         | 0 s <sup>-1</sup>                           | 0.2 s <sup>-1</sup>                       | 0 s <sup>-1</sup>                        |
| R2C2 + cAMP <====> R2C2-cAMP                    | 9e-05 # <sup>-1</sup> .s <sup>-1</sup>      | 33 s <sup>-1</sup>                          | 54 uM <sup>-1</sup> .s <sup>-1</sup>      | 33 s <sup>-1</sup>                       |
| R2C2-cAMP + cAMP <====> R2C2-cAMP2              | 9e-05 # <sup>-1</sup> .s <sup>-1</sup>      | 33 s <sup>-1</sup>                          | 54 uM <sup>-1</sup> .s <sup>-1</sup>      | 33 s <sup>-1</sup>                       |
| R2C2-cAMP2 + cAMP <====> R2C2-cAMP3             | 0.000125 # <sup>-1</sup> .s <sup>-1</sup>   | 110 s <sup>-1</sup>                         | 75 uM <sup>-1</sup> .s <sup>-1</sup>      | 110 s <sup>-1</sup>                      |
| cAMP + R2C2-cAMP3 <====> R2C2-cAMP4             | 0.000125 # <sup>-1</sup> .s <sup>-1</sup>   | 32.5 s <sup>-1</sup>                        | 75 uM <sup>-1</sup> .s <sup>-1</sup>      | 32.5 s <sup>-1</sup>                     |
| R2C2-cAMP4 <====> PKA-active + R2C-cAMP4        | 60 s <sup>-1</sup>                          | 3e-05 # <sup>-1</sup> .s <sup>-1</sup>      | 60 s <sup>-1</sup>                        | 18 uM <sup>-1</sup> .s <sup>-1</sup>     |
| R2C-cAMP4 <====> PKA-active + R2-cAMP4          | 60 s <sup>-1</sup>                          | 3e-05 # <sup>-1</sup> .s <sup>-1</sup>      | 60 s <sup>-1</sup>                        | 18 uM <sup>-1</sup> .s <sup>-1</sup>     |
| R2-cAMP4 <====> R2 + cAMP                       | 0.0005 s <sup>-1</sup>                      | 1.6667e-10 # <sup>-1</sup> .s <sup>-1</sup> | 0.0005 s <sup>-1</sup>                    | 0.0001 uM <sup>-1</sup> .s <sup>-1</sup> |
| PKA-active + R2 <====> R2C1                     | 0.0013317 # <sup>-1</sup> .s <sup>-1</sup>  | 0.186 s <sup>-1</sup>                       | 799.02 uM <sup>-1</sup> .s <sup>-1</sup>  | 0.186 s <sup>-1</sup>                    |
| PKA-active + R2C1 <====> R2C2                   | 0.0013317 # <sup>-1</sup> .s <sup>-1</sup>  | 0.186 s <sup>-1</sup>                       | 799.02 uM <sup>-1</sup> .s <sup>-1</sup>  | 0.186 s <sup>-1</sup>                    |
| PKA-active + PKA-inhibitor <====> inhibited-PKA | 0.0001 # <sup>-1</sup> .s <sup>-1</sup>     | 1 s <sup>-1</sup>                           | 60 uM <sup>-1</sup> .s <sup>-1</sup>      | 1 s <sup>-1</sup>                        |
| PKA-active <====> PKA-active_n                  | 0.000305 s <sup>-1</sup>                    | 0.00125 s <sup>-1</sup>                     | 0.000305 s <sup>-1</sup>                  | 0.00125 s <sup>-1</sup>                  |
| CaM-Ca4 + AC1 <====> AC1-CaM                    | 8.3333e-05 # <sup>-1</sup> .s <sup>-1</sup> | 1 s <sup>-1</sup>                           | 50 uM <sup>-1</sup> .s <sup>-1</sup>      | 1 s <sup>-1</sup>                        |
| AC2_star <====> AC2                             | 0.1 s <sup>-1</sup>                         | 0 s <sup>-1</sup>                           | 0.1 s <sup>-1</sup>                       | 0 s <sup>-1</sup>                        |
| cAMP-PDE_star <====> cAMP-PDE                   | 0.1 s <sup>-1</sup>                         | 0 s <sup>-1</sup>                           | 0.1 s <sup>-1</sup>                       | 0 s <sup>-1</sup>                        |
| PDE1 + CaM-Ca4 <====> CaM.PDE1                  | 0.0012 # <sup>-1</sup> .s <sup>-1</sup>     | 5 s <sup>-1</sup>                           | 720 uM <sup>-1</sup> .s <sup>-1</sup>     | 5 s <sup>-1</sup>                        |
| CaM-Ca3 + Ca <====> CaM-Ca4                     | 7.7501e-07 # <sup>-1</sup> .s <sup>-1</sup> | 10 s <sup>-1</sup>                          | 0.46501 uM <sup>-1</sup> .s <sup>-1</sup> | 10 s <sup>-1</sup>                       |
| CaM + Ca <====> CaM-Ca                          | 1.4141e-05 # <sup>-1</sup> .s <sup>-1</sup> | 8.4853 s <sup>-1</sup>                      | 8.4846 uM <sup>-1</sup> .s <sup>-1</sup>  | 8.4853 s <sup>-1</sup>                   |
| CaM-Ca2 + Ca <====> CaM-Ca3                     | 6.0001e-06 # <sup>-1</sup> .s <sup>-1</sup> | 10 s <sup>-1</sup>                          | 3.6001 uM <sup>-1</sup> .s <sup>-1</sup>  | 10 s <sup>-1</sup>                       |
| CaM-Ca + Ca <====> CaM-Ca2                      | 1.4141e-05 # <sup>-1</sup> .s <sup>-1</sup> | 8.4853 s <sup>-1</sup>                      | 8.4846 uM <sup>-1</sup> .s <sup>-1</sup>  | 8.4853 s <sup>-1</sup>                   |
| craf-1 + GTP-Ras <====> Raf-GTP-Ras             | 1e-05 # <sup>-1</sup> .s <sup>-1</sup>      | 1 s <sup>-1</sup>                           | 6 uM <sup>-1</sup> .s <sup>-1</sup>       | 1 s <sup>-1</sup>                        |
| craf-1_star + GTP-Ras <====> Raf_star-GTP-Ras   | 1.6666e-05 # <sup>-1</sup> .s <sup>-1</sup> | 0.5 s <sup>-1</sup>                         | 9.9996 uM <sup>-1</sup> .s <sup>-1</sup>  | 0.5 s <sup>-1</sup>                      |
| bRaf + GTP-Ras <====> braf-GTP-Ras              | 0.0001 # <sup>-1</sup> .s <sup>-1</sup>     | 0.5 s <sup>-1</sup>                         | 60 uM <sup>-1</sup> .s <sup>-1</sup>      | 0.5 s <sup>-1</sup>                      |
| BetaGamma + inact-GEF <====> GEF-Gprot-bg       | 1e-05 # <sup>-1</sup> .s <sup>-1</sup>      | 1 s <sup>-1</sup>                           | 6 uM <sup>-1</sup> .s <sup>-1</sup>       | 1 s <sup>-1</sup>                        |
| GEF_star <====> inact-GEF                       | 1 s <sup>-1</sup>                           | 0 s <sup>-1</sup>                           | 1 s <sup>-1</sup>                         | 0 s <sup>-1</sup>                        |
| GTP-Ras <====> GDP-Ras                          | 0.0001 s <sup>-1</sup>                      | 0 s <sup>-1</sup>                           | 0.0001 s <sup>-1</sup>                    | 0 s <sup>-1</sup>                        |
| GAP_star <====> GAP                             | 0.1 s <sup>-1</sup>                         | 0 s <sup>-1</sup>                           | 0.1 s <sup>-1</sup>                       | 0 s <sup>-1</sup>                        |
| inact-GEF + CaM-Ca4 <====> CaM-GEF              | 0.0001 # <sup>-1</sup> .s <sup>-1</sup>     | 1 s <sup>-1</sup>                           | 60 uM <sup>-1</sup> .s <sup>-1</sup>      | 1 s <sup>-1</sup>                        |
| inact-GEF_star <====> inact-GEF                 | 1 s <sup>-1</sup>                           | 0 s <sup>-1</sup>                           | 1 s <sup>-1</sup>                         | 0 s <sup>-1</sup>                        |
| I1_star + PP1-active_c <====> PP1-I1_star       | 0.00083329 # <sup>-1</sup> .s <sup>-1</sup> | 0.1 s <sup>-1</sup>                         | 499.97 uM <sup>-1</sup> .s <sup>-1</sup>  | 0.1 s <sup>-1</sup>                      |
| PP1-I1 <====> PP1-active_c + I1                 | 1 s <sup>-1</sup>                           | 0 # <sup>-1</sup> .s <sup>-1</sup>          | 1 s <sup>-1</sup>                         | 0 uM <sup>-1</sup> .s <sup>-1</sup>      |
| 2 Ca + CaNAB-Ca2 <====> CaNAB-Ca4               | 9.9998e-12 # <sup>-2</sup> .s <sup>-1</sup> | 1 s <sup>-1</sup>                           | 3.5999 uM <sup>-2</sup> .s <sup>-1</sup>  | 1 s <sup>-1</sup>                        |

|                                                      |                      |             |                    |              |
|------------------------------------------------------|----------------------|-------------|--------------------|--------------|
| CaNAB + 2 Ca <====> CaNAB-Ca2                        | 2.7801e-08 #^-2.s^-1 | 1 s^-1      | 10008 uM^-2.s^-1   | 1 s^-1       |
| CaNAB-Ca4 + CaM-Ca2 <====> CaMca2-CANAB              | 4e-07 #^-1.s^-1      | 1 s^-1      | 0.24 uM^-1.s^-1    | 1 s^-1       |
| CaNAB-Ca4 + CaM-Ca3 <====> CaMca3-CaNAB              | 3.73e-06 #^-1.s^-1   | 1 s^-1      | 2.238 uM^-1.s^-1   | 1 s^-1       |
| CaM-Ca4 + CaNAB-Ca4 <====> CaMca4-CaNAB              | 0.001 #^-1.s^-1      | 1 s^-1      | 600 uM^-1.s^-1     | 1 s^-1       |
| CaM-Ca4 + CaMKIVc <====> CaMKIV_CaM_Ca_c             | 2.22e-08 #^-1.s^-1   | 0.01 s^-1   | 0.01332 uM^-1.s^-1 | 0.01 s^-1    |
| CaM-Ca4 + CaMKK_c <====> CaMKK_CaM_Ca_c              | 6.75e-06 #^-1.s^-1   | 0.02 s^-1   | 4.05 uM^-1.s^-1    | 0.02 s^-1    |
| pCaMKIV_CaM_Ca_c <====> pCaMKIV_CaM_Ca_n             | 0.0009 s^-1          | 0.007 s^-1  | 0.0009 s^-1        | 0.007 s^-1   |
| BDNF_TrkB2_clx <====> BDNF_TrkB2_star_clx            | 0.02 s^-1            | 0 s^-1      | 0.02 s^-1          | 0 s^-1       |
| BDNF_TrkB_clx + TrkB <====> BDNF_TrkB2_clx           | 1.6667e-06 #^-1.s^-1 | 0.02 s^-1   | 0.99999 uM^-1.s^-1 | 0.02 s^-1    |
| TrkB + BDNF <====> BDNF_TrkB_clx                     | 1.6668e-06 #^-1.s^-1 | 0.05 s^-1   | 1 uM^-1.s^-1       | 0.05 s^-1    |
| BDNF_TrkB2_star_clx <====> 2 Int_BDNF_TrkB2_star_clx | 0.01 s^-1            | 0 #^-1.s^-1 | 0.01 s^-1          | 0 uM^-1.s^-1 |
| Int_BDNF_TrkB2_star_clx <====> TrkB                  | 0.001 s^-1           | 0.001 s^-1  | 0.001 s^-1         | 0.001 s^-1   |
| PLC_g_star <====> PLC_g                              | 0.07 s^-1            | 0 s^-1      | 0.07 s^-1          | 0 s^-1       |

#### Enzymes for group ##[]

| Enzyme-reaction                                  | k1                   | k2          | k3           | Km           | kcat         | ratio  |
|--------------------------------------------------|----------------------|-------------|--------------|--------------|--------------|--------|
| AC2 ---PKC-active-> AC2_star                     | 1e-06 #^-1.s^-1      | 16 s^-1     | 4 s^-1       | 33.333 uM    | 4 s^-1       | 4      |
| GAP ---PKC-active-> GAP_star                     | 1e-05 #^-1.s^-1      | 16 s^-1     | 4 s^-1       | 3.3333 uM    | 4 s^-1       | 4      |
| inact-GEF ---PKC-active-> GEF_star               | 1e-05 #^-1.s^-1      | 16 s^-1     | 4 s^-1       | 3.3333 uM    | 4 s^-1       | 4      |
| craf-1 ---PKC-active-> craf-1_star               | 4.9999e-07 #^-1.s^-1 | 16 s^-1     | 4 s^-1       | 66.668 uM    | 4 s^-1       | 4      |
| cAMP-PDE ---PKA-active-> cAMP-PDE_star           | 1e-05 #^-1.s^-1      | 36 s^-1     | 9 s^-1       | 7.5 uM       | 9 s^-1       | 4      |
| Src ---PKA-active-> Src_star                     | 0.0033334 #^-1.s^-1  | 80 s^-1     | 20 s^-1      | 0.049999 uM  | 20 s^-1      | 4      |
| inact-GEF ---PKA-active-> inact-GEF_star         | 1e-05 #^-1.s^-1      | 36 s^-1     | 9 s^-1       | 7.5 uM       | 9 s^-1       | 4      |
| I1 ---PKA-active-> I1_star                       | 1e-05 #^-1.s^-1      | 36 s^-1     | 9 s^-1       | 7.5 uM       | 9 s^-1       | 4      |
| CaMKK_CaM_Ca_c ---PKA-active-> CaM-Ca4 + CaMKKp  | 1.2116e-06 #^-1.s^-1 | 2.7333 s^-1 | 0.68333 s^-1 | 4.6999 uM    | 0.68333 s^-1 | 4      |
| SIK2 ---PKA-active-> SIK2_star                   | 1.8117e-07 #^-1.s^-1 | 0.4 s^-1    | 0.1 s^-1     | 4.5997 uM    | 0.1 s^-1     | 4      |
| I1n ---PKA-active_n-> I1_star_n                  | 2.7027e-05 #^-1.s^-1 | 36 s^-1     | 9 s^-1       | 7.5 uM       | 9 s^-1       | 4      |
| bRaf_Rap1GTP ---Rap1GAP-> Rap1GDP + bRaf         | 0.00033667 #^-1.s^-1 | 200 s^-1    | 2 s^-1       | 0.99999 uM   | 2 s^-1       | 100    |
| Rap1GTP ---Rap1GAP-> Rap1GDP                     | 0.00033667 #^-1.s^-1 | 200 s^-1    | 2 s^-1       | 0.99999 uM   | 2 s^-1       | 100    |
| MAPKK-ser ---bRaf_Rap1GTP-> MAPKK_star           | 1.5625e-05 #^-1.s^-1 | 1.2 s^-1    | 0.3 s^-1     | 0.16 uM      | 0.3 s^-1     | 4      |
| MAPKK ---bRaf_Rap1GTP-> MAPKK-ser                | 1.5625e-05 #^-1.s^-1 | 1.2 s^-1    | 0.3 s^-1     | 0.16 uM      | 0.3 s^-1     | 4      |
| MAPK-tyr ---MKP-1-> MAPK                         | 0.00025 #^-1.s^-1    | 16 s^-1     | 4 s^-1       | 0.13333 uM   | 4 s^-1       | 4      |
| MAPK_star ---MKP-1-> MAPK-tyr                    | 0.00025 #^-1.s^-1    | 16 s^-1     | 4 s^-1       | 0.13333 uM   | 4 s^-1       | 4      |
| craf-1_star ---PPhosphatase2A-> craf-1           | 3.1935e-06 #^-1.s^-1 | 24 s^-1     | 6 s^-1       | 15.657 uM    | 6 s^-1       | 4      |
| MAPKK_star ---PPhosphatase2A-> MAPKK-ser         | 3.1935e-06 #^-1.s^-1 | 24 s^-1     | 6 s^-1       | 15.657 uM    | 6 s^-1       | 4      |
| MAPKK-ser ---PPhosphatase2A-> MAPKK              | 3.1935e-06 #^-1.s^-1 | 24 s^-1     | 6 s^-1       | 15.657 uM    | 6 s^-1       | 4      |
| craf-1_star_star ---PPhosphatase2A-> craf-1_star | 3.1935e-06 #^-1.s^-1 | 24 s^-1     | 6 s^-1       | 15.657 uM    | 6 s^-1       | 4      |
| ppRSK ---PDK1-> active_RSK2                      | 8.3333e-07 #^-1.s^-1 | 4 s^-1      | 1 s^-1       | 10 uM        | 1 s^-1       | 4      |
| active_RSK2 ---PP2A-> ppRSK                      | 9.4692e-07 #^-1.s^-1 | 4 s^-1      | 1 s^-1       | 8.8005 uM    | 1 s^-1       | 4      |
| I1_star ---PP2A-> I1                             | 6.6e-06 #^-1.s^-1    | 25 s^-1     | 6 s^-1       | 7.8283 uM    | 6 s^-1       | 4.1667 |
| CaMKKp ---PP2A-> CaMKK_c                         | 1.1667e-06 #^-1.s^-1 | 2.8 s^-1    | 0.7 s^-1     | 4.9999 uM    | 0.7 s^-1     | 4      |
| pCaMKIV_CaM_Ca_c ---PP2A-> CaMKIV_CaM_Ca_c       | 1.8939e-06 #^-1.s^-1 | 8 s^-1      | 2 s^-1       | 8.8002 uM    | 2 s^-1       | 4      |
| pRSK ---PP2A-> RSK                               | 9.4692e-07 #^-1.s^-1 | 4 s^-1      | 1 s^-1       | 8.8005 uM    | 1 s^-1       | 4      |
| PP1-I1_star ---PP2A-> PP1-I1                     | 6.6e-06 #^-1.s^-1    | 25 s^-1     | 6 s^-1       | 7.8283 uM    | 6 s^-1       | 4.1667 |
| pCREB_CRE ---PP1_active_n-> CREB_CRE             | 4.5045e-06 #^-1.s^-1 | 4 s^-1      | 1 s^-1       | 5 uM         | 1 s^-1       | 4      |
| CREB_CRE ---active_RSK2_n-> pCREB_CRE            | 4.5045e-07 #^-1.s^-1 | 0.4 s^-1    | 0.1 s^-1     | 5 uM         | 0.1 s^-1     | 4      |
| I1_star ---CaNAB-Ca4-> I1                        | 5.7e-08 #^-1.s^-1    | 0.136 s^-1  | 0.034 s^-1   | 4.9708 uM    | 0.034 s^-1   | 4      |
| CREB_CRE ---pMSK1_n-> pCREB_CRE                  | 1.1261e-06 #^-1.s^-1 | 0.4 s^-1    | 0.1 s^-1     | 2 uM         | 0.1 s^-1     | 4      |
| pMSK1_n ---PP2An-> MSK1_n                        | 2.5594e-06 #^-1.s^-1 | 4 s^-1      | 1 s^-1       | 8.7999 uM    | 1 s^-1       | 4      |
| I1_star_n ---PP2An-> I1n                         | 1.7262e-05 #^-1.s^-1 | 24 s^-1     | 6 s^-1       | 7.8285 uM    | 6 s^-1       | 4      |
| PLC_g ---PLCg_basal-> PLC_g_star                 | 1.3889e-05 #^-1.s^-1 | 2 s^-1      | 0.5 s^-1     | 0.3 uM       | 0.5 s^-1     | 4      |
| Nucleotides ---Basal_transcription-> mRNA_clx    | 1.0416e-06 #^-1.s^-1 | 0.2 s^-1    | 0.05 s^-1    | 1.0812 uM    | 0.05 s^-1    | 4      |
| CREB_CRE ---pCaMKIV_CaM_Ca_nuc-> pCREB_CRE       | 2.8665e-06 #^-1.s^-1 | 2.8 s^-1    | 0.7 s^-1     | 5.5 uM       | 0.7 s^-1     | 4      |
| GDP-Ras ---Shc_star.Sos.Grb2-> GTP-Ras           | 3.3e-05 #^-1.s^-1    | 0.8 s^-1    | 0.2 s^-1     | 0.050505 uM  | 0.2 s^-1     | 4      |
| Rap1GDP ---CRK_C3G_Cbl_star_clx-> Rap1GTP        | 6.6668e-05 #^-1.s^-1 | 0.2 s^-1    | 0.2 s^-1     | 0.0099998 uM | 0.2 s^-1     | 1      |
| Cbl ---Src_star-> Cbl_star                       | 0.00066665 #^-1.s^-1 | 160 s^-1    | 40 s^-1      | 0.50001 uM   | 40 s^-1      | 4      |

|                                                |                      |           |            |             |            |        |
|------------------------------------------------|----------------------|-----------|------------|-------------|------------|--------|
| MSK1_n ---MAPK_star_n--> pMSK1_n               | 4.2496e-07 #^-1.s^-1 | 0.4 s^-1  | 0.1 s^-1   | 5.2999 uM   | 0.1 s^-1   | 4      |
| Sos ---MAPK_star--> Sos_star                   | 3.2552e-05 #^-1.s^-1 | 40 s^-1   | 10 s^-1    | 2.56 uM     | 10 s^-1    | 4      |
| RSK ---MAPK_star--> pRSK                       | 2.673e-06 #^-1.s^-1  | 6.8 s^-1  | 1.7 s^-1   | 5.2999 uM   | 1.7 s^-1   | 4      |
| craf-1_star ---MAPK_star--> craf-1_star_star   | 3.25e-06 #^-1.s^-1   | 40 s^-1   | 10 s^-1    | 25.641 uM   | 10 s^-1    | 4      |
| Nucleotides ---Transcription_clx--> mRNA_clx   | 1.0427e-06 #^-1.s^-1 | 0.2 s^-1  | 0.05 s^-1  | 1.08 uM     | 0.05 s^-1  | 4      |
| TORC1c ---SIK2--> pTORC1                       | 8.3333e-07 #^-1.s^-1 | 1.6 s^-1  | 0.4 s^-1   | 4 uM        | 0.4 s^-1   | 4      |
| I1_star ---CaM_Ca_n-CaNAB--> I1                | 5.7e-07 #^-1.s^-1    | 1.36 s^-1 | 0.34 s^-1  | 4.9708 uM   | 0.34 s^-1  | 4      |
| pTORC1 ---CaM_Ca_n-CaNAB--> TORC1c             | 2.0833e-06 #^-1.s^-1 | 0.4 s^-1  | 0.1 s^-1   | 0.40001 uM  | 0.1 s^-1   | 4      |
| PP1-I1_star ---CaM_Ca_n-CaNAB--> PP1-I1        | 5.7e-07 #^-1.s^-1    | 1.36 s^-1 | 0.34 s^-1  | 4.9708 uM   | 0.34 s^-1  | 4      |
| ATP ---AC1-CaM--> cAMP                         | 7.5e-06 #^-1.s^-1    | 72 s^-1   | 18 s^-1    | 20 uM       | 18 s^-1    | 4      |
| cAMP ---cAMP-PDE--> AMP                        | 4.2e-06 #^-1.s^-1    | 40 s^-1   | 10 s^-1    | 19.841 uM   | 10 s^-1    | 4      |
| cAMP ---PDE1--> AMP                            | 3.5e-07 #^-1.s^-1    | 6.67 s^-1 | 1.667 s^-1 | 39.7 uM     | 1.667 s^-1 | 4.0012 |
| cAMP ---CaM.PDE1--> AMP                        | 2.1e-06 #^-1.s^-1    | 40 s^-1   | 10 s^-1    | 39.683 uM   | 10 s^-1    | 4      |
| ATP ---AC2_star--> cAMP                        | 2.9e-06 #^-1.s^-1    | 28 s^-1   | 7 s^-1     | 20.115 uM   | 7 s^-1     | 4      |
| cAMP ---cAMP-PDE_star--> AMP                   | 8.4e-06 #^-1.s^-1    | 80 s^-1   | 20 s^-1    | 19.841 uM   | 20 s^-1    | 4      |
| MAPKK ---Raf-GTP-Ras--> MAPKK-ser              | 1.5714e-05 #^-1.s^-1 | 1.2 s^-1  | 0.3 s^-1   | 0.15909 uM  | 0.3 s^-1   | 4      |
| MAPKK-ser ---Raf-GTP-Ras--> MAPKK_star         | 1.5714e-05 #^-1.s^-1 | 1.2 s^-1  | 0.3 s^-1   | 0.15909 uM  | 0.3 s^-1   | 4      |
| MAPKK-ser ---braf-GTP-Ras--> MAPKK_star        | 1.0417e-05 #^-1.s^-1 | 0.8 s^-1  | 0.2 s^-1   | 0.15999 uM  | 0.2 s^-1   | 4      |
| MAPKK ---braf-GTP-Ras--> MAPKK-ser             | 1.0417e-05 #^-1.s^-1 | 0.8 s^-1  | 0.2 s^-1   | 0.15999 uM  | 0.2 s^-1   | 4      |
| MAPKK-ser ---Raf_star-GTP-Ras--> MAPKK_star    | 1.5714e-05 #^-1.s^-1 | 1.2 s^-1  | 0.3 s^-1   | 0.15909 uM  | 0.3 s^-1   | 4      |
| MAPKK ---Raf_star-GTP-Ras--> MAPKK-ser         | 1.5714e-05 #^-1.s^-1 | 1.2 s^-1  | 0.3 s^-1   | 0.15909 uM  | 0.3 s^-1   | 4      |
| MAPK ---MAPKK_star--> MAPK-tyr                 | 5.4e-05 #^-1.s^-1    | 1.2 s^-1  | 0.3 s^-1   | 0.046296 uM | 0.3 s^-1   | 4      |
| MAPK-tyr ---MAPKK_star--> MAPK_star            | 5.4e-05 #^-1.s^-1    | 1.2 s^-1  | 0.3 s^-1   | 0.046296 uM | 0.3 s^-1   | 4      |
| GDP-Ras ---GEF-Gprot-bg--> GTP-Ras             | 3.3e-07 #^-1.s^-1    | 0.08 s^-1 | 0.02 s^-1  | 0.50505 uM  | 0.02 s^-1  | 4      |
| GTP-Ras ---GAP--> GDP-Ras                      | 8.2476e-05 #^-1.s^-1 | 40 s^-1   | 10 s^-1    | 1.0104 uM   | 10 s^-1    | 4      |
| GDP-Ras ---CaM-GEF--> GTP-Ras                  | 3.3e-07 #^-1.s^-1    | 0.08 s^-1 | 0.02 s^-1  | 0.50505 uM  | 0.02 s^-1  | 4      |
| GDP-Ras ---GEF_star--> GTP-Ras                 | 3.3e-07 #^-1.s^-1    | 0.08 s^-1 | 0.02 s^-1  | 0.50505 uM  | 0.02 s^-1  | 4      |
| CaMKIV_CaM_Ca_c ---CaMKK_CaM_Ca_c--> pCaMKIV_C | 7.0513e-06 #^-1.s^-1 | 4.4 s^-1  | 1.1 s^-1   | 1.3 uM      | 1.1 s^-1   | 4      |
| PLC_g ---BDNF_TrkB2_star_clx--> PLC_g_star     | 1.3889e-05 #^-1.s^-1 | 2 s^-1    | 0.5 s^-1   | 0.30001 uM  | 0.5 s^-1   | 4      |
| Shc ---BDNF_TrkB2_star_clx--> Shc_star         | 3.0003e-06 #^-1.s^-1 | 1.2 s^-1  | 0.3 s^-1   | 0.83328 uM  | 0.3 s^-1   | 4      |

Pools for group /###[]

| name           | InitialConc | buffered | Volume  |
|----------------|-------------|----------|---------|
| CaM-Ca4        | 0 uM        | 0        | 1000 fl |
| PKC-active     | 0.01 uM     | 1        | 1000 fl |
| PKA-active     | 0 uM        | 0        | 1000 fl |
| cAMP           | 0 uM        | 0        | 1000 fl |
| PKA-active_n   | 0 uM        | 0        | 370 fl  |
| Ca             | 0.08 uM     | 0        | 1000 fl |
| Src            | 0.02 uM     | 0        | 1000 fl |
| Cbl            | 0.5 uM      | 0        | 1000 fl |
| C3G            | 0.5 uM      | 0        | 1000 fl |
| CRK            | 1 uM        | 0        | 1000 fl |
| CRK_C3G        | 0 uM        | 0        | 1000 fl |
| Rap1GTP        | 0 uM        | 0        | 1000 fl |
| Rap1GDP        | 0.2 uM      | 0        | 1000 fl |
| Rap1GAP        | 0.012 uM    | 0        | 1000 fl |
| bRaf_Rap1GTP   | 0 uM        | 0        | 1000 fl |
| bRaf           | 0.2 uM      | 0        | 1000 fl |
| MKP-1          | 0.015 uM    | 0        | 1000 fl |
| PPhosphatase2A | 1 uM        | 0        | 1000 fl |
| MSK1_n         | 0.2 uM      | 0        | 370 fl  |
| PDK1           | 1 uM        | 0        | 1000 fl |
| PP2A           | 0.15 uM     | 1        | 1000 fl |
| PP1_active_n   | 0 uM        | 0        | 370 fl  |
| ppRSK          | 0 uM        | 0        | 1000 fl |

|                      |           |   |           |
|----------------------|-----------|---|-----------|
| active_RSK2          | 0 uM      | 0 | 1000 fl   |
| active_RSK2_n        | 0 uM      | 0 | 370 fl    |
| RSK                  | 0.2 uM    | 0 | 1000 fl   |
| pRSK                 | 0 uM      | 0 | 1000 fl   |
| BetaGamma            | 0 uM      | 0 | 1000 fl   |
| CaNAB-Ca4            | 0 uM      | 0 | 1000 fl   |
| PP1-active_c         | 1.8 uM    | 0 | 1000 fl   |
| pMSK1_n              | 0 uM      | 0 | 370 fl    |
| Ca_input             | 0 uM      | 0 | 1000 fl   |
| PP2An                | 0.1 uM    | 0 | 370 fl    |
| BDNF                 | 5e-05 uM  | 1 | 999.97 fl |
| PLC_g                | 0.1 uM    | 0 | 1000 fl   |
| PLCg_basal           | 0.0007 uM | 0 | 1000 fl   |
| Grb2                 | 1 uM      | 0 | 1000 fl   |
| Shc                  | 0.5 uM    | 0 | 1000 fl   |
| Sos                  | 0.1 uM    | 0 | 1000 fl   |
| Sos.Grb2             | 0 uM      | 0 | 1000 fl   |
| CBP                  | 0.5 uM    | 0 | 370 fl    |
| mRNA_clx             | 0 uM      | 0 | 370 fl    |
| Basal_transcription  | 5e-05 uM  | 0 | 370 fl    |
| mRNA                 | 0 uM      | 0 | 370 fl    |
| degraded_mRNA        | 0 uM      | 1 | 370 fl    |
| CREB_CRE             | 0.5 uM    | 0 | 370 fl    |
| pCREB_CRE            | 0 uM      | 0 | 370 fl    |
| Basal_CaMKIV         | 0.0005 uM | 0 | 1000 fl   |
| pCaMKIV_CaM_Ca_nuc   | 0 uM      | 0 | 370 fl    |
| pCaMKIV_CaM_Ca_n     | 0 uM      | 0 | 370 fl    |
| Basal_CaMKIV_n       | 5e-05 uM  | 0 | 370 fl    |
| Sum_total_CaMKIV     | 0 uM      | 0 | 1000 fl   |
| MAPK_active_total    | 0 uM      | 0 | 1000 fl   |
| Basal_MAPK_active    | 0.0001 uM | 0 | 1000 fl   |
| Shc_star             | 0 uM      | 0 | 1000 fl   |
| PLC_g_star           | 0 uM      | 0 | 1000 fl   |
| Sos_star             | 0 uM      | 0 | 1000 fl   |
| Shc_star.Sos.Grb2    | 0 uM      | 0 | 1000 fl   |
| Sos_star.Grb2        | 0 uM      | 0 | 1000 fl   |
| CRK_C3G_Cbl_star_clx | 0 uM      | 0 | 1000 fl   |
| Cbl_star             | 0 uM      | 0 | 1000 fl   |
| Src_star             | 0 uM      | 0 | 1000 fl   |
| MAPK_star_n          | 0 uM      | 0 | 370 fl    |
| MAPK_star            | 0 uM      | 0 | 1000 fl   |
| pTORC1               | 0 uM      | 0 | 1000 fl   |
| TORC1n               | 0 uM      | 0 | 370 fl    |
| TORC1c               | 0.1 uM    | 0 | 1000 fl   |
| CBP_pCREB_CRE        | 0 uM      | 0 | 370 fl    |
| Transcription_clx    | 0 uM      | 0 | 370 fl    |
| Nucleotides          | 0.2 uM    | 1 | 369.98 fl |
| SIK2                 | 0.5 uM    | 0 | 1000 fl   |
| SIK2_star            | 0 uM      | 0 | 1000 fl   |
| PP1-I1n              | 0 uM      | 0 | 370 fl    |
| I1n                  | 0 uM      | 0 | 370 fl    |
| I1_star_n            | 0 uM      | 0 | 369.98 fl |
| CaM_Ca_n-CaNAB       | 0 uM      | 0 | 1000 fl   |
| R2C2                 | 0.5 uM    | 0 | 1000 fl   |
| R2C2-cAMP            | 0 uM      | 0 | 1000 fl   |
| R2C2-cAMP2           | 0 uM      | 0 | 1000 fl   |

|                  |               |   |              |
|------------------|---------------|---|--------------|
| R2C2-cAMP3       | 0 uM          | 0 | 1000 fl      |
| R2C2-cAMP4       | 0 uM          | 0 | 1000 fl      |
| R2C-cAMP4        | 0 uM          | 0 | 1000 fl      |
| R2-cAMP4         | 0 uM          | 0 | 1000 fl      |
| R2               | 0 uM          | 0 | 1000 fl      |
| R2C1             | 0 uM          | 0 | 1000 fl      |
| inhibited-PKA    | 0 uM          | 0 | 1000 fl      |
| PKA-inhibitor    | 0.25 uM       | 0 | 1000 fl      |
| ATP              | 5000 uM       | 1 | 1000 fl      |
| AC1-CaM          | 0 uM          | 0 | 1000 fl      |
| AC1              | 0.02 uM       | 0 | 1000 fl      |
| AC2              | 0.015 uM      | 0 | 1000 fl      |
| AMP              | 3.2549e+05 uM | 0 | 0.0016667 fl |
| cAMP-PDE         | 0.45 uM       | 0 | 1000 fl      |
| PDE1             | 2 uM          | 0 | 1000 fl      |
| CaM.PDE1         | 0 uM          | 0 | 1000 fl      |
| AC2_star         | 0 uM          | 0 | 1000 fl      |
| cAMP-PDE_star    | 0 uM          | 0 | 1000 fl      |
| CaM              | 20 uM         | 0 | 1000 fl      |
| CaM-Ca3          | 0 uM          | 0 | 1000 fl      |
| CaM-Ca2          | 0 uM          | 0 | 1000 fl      |
| CaM-Ca           | 0 uM          | 0 | 1000 fl      |
| craf-1           | 0.2 uM        | 0 | 1000 fl      |
| MAPKK            | 0.18 uM       | 0 | 1000 fl      |
| MAPK             | 0.36 uM       | 0 | 1000 fl      |
| MAPK-tyr         | 0 uM          | 0 | 1000 fl      |
| MAPKK-ser        | 0 uM          | 0 | 1000 fl      |
| Raf-GTP-Ras      | 0 uM          | 0 | 1000 fl      |
| braf-GTP-Ras     | 0 uM          | 0 | 1000 fl      |
| craf-1_star      | 0 uM          | 0 | 1000 fl      |
| craf-1_star_star | 0 uM          | 0 | 1000 fl      |
| Raf_star-GTP-Ras | 0 uM          | 0 | 1000 fl      |
| MAPKK_star       | 0 uM          | 0 | 1000 fl      |
| GEF-Gprot-bg     | 0 uM          | 0 | 1000 fl      |
| inact-GEF        | 0.1 uM        | 0 | 1000 fl      |
| GTP-Ras          | 0 uM          | 0 | 1000 fl      |
| GDP-Ras          | 0.5 uM        | 0 | 1000 fl      |
| GAP              | 0.01 uM       | 0 | 1000 fl      |
| CaM-GEF          | 0 uM          | 0 | 1000 fl      |
| GEF_star         | 0 uM          | 0 | 1000 fl      |
| inact-GEF_star   | 0 uM          | 0 | 1000 fl      |
| GAP_star         | 0 uM          | 0 | 1000 fl      |
| I1               | 1.8 uM        | 0 | 1000 fl      |
| PP1-I1           | 0 uM          | 0 | 1000 fl      |
| I1_star          | 0.001 uM      | 0 | 1000 fl      |
| PP1-I1_star      | 0 uM          | 0 | 1000 fl      |
| CaNAB            | 1 uM          | 0 | 1000 fl      |
| CaNAB-Ca2        | 0 uM          | 0 | 1000 fl      |
| CaMca3-CaNAB     | 0 uM          | 0 | 1000 fl      |
| CaMca2-CaNAB     | 0 uM          | 0 | 1000 fl      |
| CaMca4-CaNAB     | 0 uM          | 0 | 1000 fl      |
| pCaMKIV_CaM_Ca_c | 0 uM          | 0 | 1000 fl      |
| CaMKIVc          | 1 uM          | 0 | 1000 fl      |
| CaMKKp           | 0 uM          | 0 | 1000 fl      |
| CaMKK_c          | 0.5 uM        | 0 | 1000 fl      |
| CaMKK_CaM_Ca_c   | 0 uM          | 0 | 1000 fl      |

|                         |         |   |           |
|-------------------------|---------|---|-----------|
| CaMKIV_CaM_Ca_c         | 0 uM    | 0 | 1000 fl   |
| pCaMKIV_CaM_Ca_c_tot    | 0 uM    | 0 | 1000 fl   |
| TrkB                    | 0.25 uM | 0 | 999.93 fl |
| BDNF_TrkB2_clx          | 0 uM    | 0 | 999.97 fl |
| BDNF_TrkB_clx           | 0 uM    | 0 | 999.93 fl |
| BDNF_TrkB2_star_clx     | 0 uM    | 0 | 999.97 fl |
| Int_BDNF_TrkB2_star_clx | 0.25 uM | 1 | 1000 fl   |

-----
