# Supplementary material for: Transcription Control Pathways Decode Patterned Synaptic Inputs into Diverse mRNA Expression Profiles
Source: PubMed Central journal article supplement (PMC4006808; doi:10.1371/journal.pone.0095154), 2014-05-01
Supplement: pone.0095154.s003.pdf [file pone.0095154.s003.pdf]

## Alternate model of mRNA synthesis model

The entire model was divided into sub-modules. The major signaling pathways in our model were the CaMKIV pathway, MAPK pathway and PP1 pathway. We constructed an alternate model in which each of PP1, MAPK and CaMKIV bind to a downstream molecule A, B and C respectively. These molecules are a minimal representation of the machinery to which PP1, CaMKIV and MAPK bind, in order to direct synthesis of specific mRNA. These models were merged with previously published models for CaM, BDNF input pathway, PP1 and PKA signaling inputs.

The following is a list of parameters (two enzyme parameters Michaelis constant ( $K_m$ ) and turnover number ( $k_{cat}$ ), two reaction parameters (forward rate ( $k_f$ ) and backward rate ( $k_b$ )), and the total concentrations of each molecule (Colnit)) were used to build-up the model. Concentration of few molecules are set as buffered (fixed concentration) shown by 1 and some are not buffered shown by 0 in the list.

$k_f$  and  $k_b$  are the scaled rates of  $k_f$  and  $k_b$  respectively which depend on cellular volume. The  $K_m$ ,  $k_{cat}$  depends on  $k_1$ ,  $k_2$ ,  $k_3$ . The relation is:

$$K_m = (k_2 + k_3)/k_1$$

$$k_{cat} = k_3$$

$$\text{ratio} = k_2/k_3$$

Volume of dendrite =  $1e-15 \text{ m}^3$  and volume of nucleus  $3.7e-16 \text{ m}^3$

Time units: Seconds (sec)

Concentration units: Micromolar ( $\mu\text{M}$ )

The modules are shown as group. Few reactions which are part of group and not included in the description of module are shown at bottom.

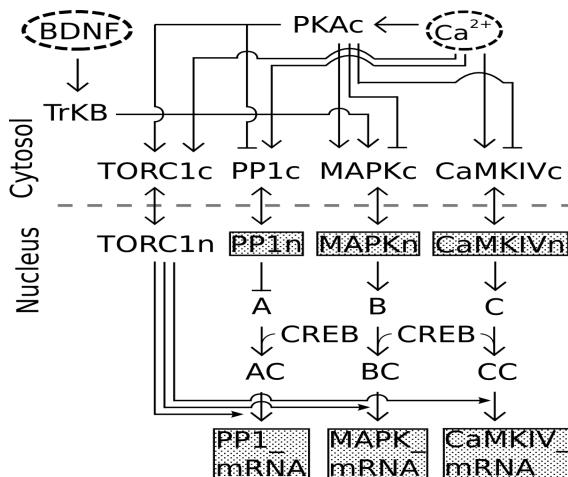

Concentration units:  $\mu\text{M}$

Time units: sec

Default Volume ( $\text{m}^3$ ) :  $1e-15$

Equations for group /kinetics

Reactions for group /kinetics

| Reaction                                                               | $k_f$                                            | $k_b$                   | $K_f$                                      | $K_b$                   |
|------------------------------------------------------------------------|--------------------------------------------------|-------------------------|--------------------------------------------|-------------------------|
| $\text{Src\_star} \rightleftharpoons \text{Src}$                       | $100 \text{ s}^{-1}$                             | $0.1 \text{ s}^{-1}$    | $100 \text{ s}^{-1}$                       | $0.1 \text{ s}^{-1}$    |
| $\text{Cbl\_star} \rightleftharpoons \text{Cbl}$                       | $10 \text{ s}^{-1}$                              | $0.01 \text{ s}^{-1}$   | $10 \text{ s}^{-1}$                        | $0.01 \text{ s}^{-1}$   |
| $\text{C3G} + \text{CRK} \rightleftharpoons \text{CRK\_C3G}$           | $1.6667e-06 \text{ \#}^{-1} \cdot \text{s}^{-1}$ | $0.002 \text{ s}^{-1}$  | $1 \text{ uM}^{-1} \cdot \text{s}^{-1}$    | $0.002 \text{ s}^{-1}$  |
| $\text{Rap1GTP} \rightleftharpoons \text{Rap1GDP}$                     | $0.0001 \text{ s}^{-1}$                          | $0 \text{ s}^{-1}$      | $0.0001 \text{ s}^{-1}$                    | $0 \text{ s}^{-1}$      |
| $\text{Rap1GTP} + \text{bRaf} \rightleftharpoons \text{bRaf\_Rap1GTP}$ | $0.0001 \text{ \#}^{-1} \cdot \text{s}^{-1}$     | $0.5 \text{ s}^{-1}$    | $60 \text{ uM}^{-1} \cdot \text{s}^{-1}$   | $0.5 \text{ s}^{-1}$    |
| $\text{MAPK\_star} \rightleftharpoons \text{MAPK\_star\_n}$            | $0.0001 \text{ s}^{-1}$                          | $0.003 \text{ s}^{-1}$  | $0.0001 \text{ s}^{-1}$                    | $0.003 \text{ s}^{-1}$  |
| $\text{active\_RSK2} \rightleftharpoons \text{active\_RSK2\_n}$        | $0.001 \text{ s}^{-1}$                           | $0.005 \text{ s}^{-1}$  | $0.001 \text{ s}^{-1}$                     | $0.005 \text{ s}^{-1}$  |
| $\text{pRSK} \rightleftharpoons \text{ppRSK}$                          | $0.1 \text{ s}^{-1}$                             | $10 \text{ s}^{-1}$     | $0.1 \text{ s}^{-1}$                       | $10 \text{ s}^{-1}$     |
| $\text{Ca\_input} \rightleftharpoons \text{Ca}$                        | $100 \text{ s}^{-1}$                             | $100 \text{ s}^{-1}$    | $100 \text{ s}^{-1}$                       | $100 \text{ s}^{-1}$    |
| $\text{Grb2} + \text{Sos} \rightleftharpoons \text{Sos.Grb2}$          | $4.1667e-07 \text{ \#}^{-1} \cdot \text{s}^{-1}$ | $0.0168 \text{ s}^{-1}$ | $0.25 \text{ uM}^{-1} \cdot \text{s}^{-1}$ | $0.0168 \text{ s}^{-1}$ |

|                                                     |                      |                     |                    |              |
|-----------------------------------------------------|----------------------|---------------------|--------------------|--------------|
| Sos.Grb2 + Shc_star <====> Shc_star.Sos.Grb2        | 8.3333e-06 #^-1.s^-1 | 0.1 s^-1            | 5 uM^-1.s^-1       | 0.1 s^-1     |
| Sos_star <====> Sos                                 | 0.001 s^-1           | 0.1 s^-1            | 0.001 s^-1         | 0.1 s^-1     |
| CBP + MAPKstar_CREB <====> CBP_pCREB_CRE            | 5.1351e-07 #^-1.s^-1 | 0.025 s^-1          | 0.114 uM^-1.s^-1   | 0.025 s^-1   |
| mRNA_clx <====> mRNA                                | 1.44 s^-1            | 0.0001 s^-1         | 1.44 s^-1          | 0.0001 s^-1  |
| mRNA <====> degraded_mRNA                           | 1 s^-1               | 0 s^-1              | 1 s^-1             | 0 s^-1       |
| Cbl_star + CRK_C3G <====> CRK_C3G_Cbl_star_clx      | 1.6667e-06 #^-1.s^-1 | 0.2 s^-1            | 1 uM^-1.s^-1       | 0.2 s^-1     |
| Grb2 + Sos_star <====> Sos_star.Grb2                | 4.1667e-08 #^-1.s^-1 | 0.0168 s^-1         | 0.025 uM^-1.s^-1   | 0.0168 s^-1  |
| TORC1c <====> TORC1n                                | 0.01 s^-1            | 0.001 s^-1          | 0.01 s^-1          | 0.001 s^-1   |
| TORC1n + CBP_pCREB_CRE <====> Transcription_clx     | 4.5045e-06 #^-1.s^-1 | 0.1 s^-1            | 1 uM^-1.s^-1       | 0.1 s^-1     |
| SIK2_star <====> SIK2                               | 0.1 s^-1             | 0 s^-1              | 0.1 s^-1           | 0 s^-1       |
| PP1-I1n <====> PP1_active_n + I1n                   | 1 s^-1               | 9.009e-06 #^-1.s^-1 | 1 s^-1             | 2 uM^-1.s^-1 |
| PP1-I1 <====> PP1-I1n                               | 0.003 s^-1           | 0.003 s^-1          | 0.003 s^-1         | 0.003 s^-1   |
| PP1_active_n + I1n <====> PP1-I1n                   | 2.2521e-06 #^-1.s^-1 | 0.1 s^-1            | 0.49997 uM^-1.s^-1 | 0.1 s^-1     |
| Shc_star <====> Shc                                 | 0.2 s^-1             | 0 s^-1              | 0.2 s^-1           | 0 s^-1       |
| CBP + CaMKIVstar_CREB <====> CBP_pCREB_CaMKIV       | 5.1351e-07 #^-1.s^-1 | 0.025 s^-1          | 0.114 uM^-1.s^-1   | 0.025 s^-1   |
| CBP_pCREB_CaMKIV + TORC1n <====> Transcription_Clx_ | 4.5045e-06 #^-1.s^-1 | 0.1 s^-1            | 1 uM^-1.s^-1       | 0.1 s^-1     |
| mRNA_clx_CaMKIV <====> mRNA_CaMKIV                  | 1.44 s^-1            | 0.0001 s^-1         | 1.44 s^-1          | 0.0001 s^-1  |
| mRNA_CaMKIV <====> deg_mRNA_CaMKIV                  | 1 s^-1               | 0 s^-1              | 1 s^-1             | 0 s^-1       |
| A_star + CREB <====> PP1star_CREB                   | 4.5045e-06 #^-1.s^-1 | 0.1 s^-1            | 1 uM^-1.s^-1       | 0.1 s^-1     |
| CREB + B_star <====> MAPKstar_CREB                  | 4.5045e-06 #^-1.s^-1 | 0.1 s^-1            | 1 uM^-1.s^-1       | 0.1 s^-1     |
| C_star + CREB <====> CaMKIVstar_CREB                | 4.5045e-06 #^-1.s^-1 | 0.1 s^-1            | 1 uM^-1.s^-1       | 0.1 s^-1     |
| CBP + PP1star_CREB <====> CBP_pCREB_PP1             | 5.1351e-07 #^-1.s^-1 | 0.025 s^-1          | 0.114 uM^-1.s^-1   | 0.025 s^-1   |
| CBP_pCREB_PP1 + TORC1n <====> Transcr_clx_PP1       | 4.5047e-06 #^-1.s^-1 | 0.1 s^-1            | 1 uM^-1.s^-1       | 0.1 s^-1     |
| PP1mRNA_clx <====> PP1_mRNA                         | 1.44 s^-1            | 0.0001 s^-1         | 1.44 s^-1          | 0.0001 s^-1  |
| PP1_mRNA <====> deg_PP1mRNA                         | 1 s^-1               | 0 s^-1              | 1 s^-1             | 0 s^-1       |

#### Enzymes for group /kinetics

| Enzyme-reaction                                   | k1                   | k2          | k3           | Km          | kcat         | ratio  |
|---------------------------------------------------|----------------------|-------------|--------------|-------------|--------------|--------|
| AC2 ---PKC-active--> AC2_star                     | 1e-06 #^-1.s^-1      | 16 s^-1     | 4 s^-1       | 33.333 uM   | 4 s^-1       | 4      |
| GAP ---PKC-active--> GAP_star                     | 1e-05 #^-1.s^-1      | 16 s^-1     | 4 s^-1       | 3.3333 uM   | 4 s^-1       | 4      |
| inact-GEF ---PKC-active--> GEF_star               | 1e-05 #^-1.s^-1      | 16 s^-1     | 4 s^-1       | 3.3333 uM   | 4 s^-1       | 4      |
| craf-1 ---PKC-active--> craf-1_star               | 4.9999e-07 #^-1.s^-1 | 16 s^-1     | 4 s^-1       | 66.668 uM   | 4 s^-1       | 4      |
| cAMP-PDE ---PKA-active--> cAMP-PDE_star           | 1e-05 #^-1.s^-1      | 36 s^-1     | 9 s^-1       | 7.5 uM      | 9 s^-1       | 4      |
| Src ---PKA-active--> Src_star                     | 0.0033334 #^-1.s^-1  | 80 s^-1     | 20 s^-1      | 0.049999 uM | 20 s^-1      | 4      |
| inact-GEF ---PKA-active--> inact-GEF_star         | 1e-05 #^-1.s^-1      | 36 s^-1     | 9 s^-1       | 7.5 uM      | 9 s^-1       | 4      |
| I1 ---PKA-active--> I1_star                       | 1e-05 #^-1.s^-1      | 36 s^-1     | 9 s^-1       | 7.5 uM      | 9 s^-1       | 4      |
| CaMKK_CaM_Ca_c ---PKA-active--> CaM-Ca4 + CaMKKp  | 1.2116e-06 #^-1.s^-1 | 2.7333 s^-1 | 0.68333 s^-1 | 4.6999 uM   | 0.68333 s^-1 | 4      |
| SIK2 ---PKA-active--> SIK2_star                   | 1.8117e-07 #^-1.s^-1 | 0.4 s^-1    | 0.1 s^-1     | 4.5997 uM   | 0.1 s^-1     | 4      |
| I1n ---PKA-active_n--> I1_star_n                  | 2.7027e-05 #^-1.s^-1 | 36 s^-1     | 9 s^-1       | 7.5 uM      | 9 s^-1       | 4      |
| bRaf_Rap1GTP ---Rap1GAP--> Rap1GDP + bRaf         | 0.00033667 #^-1.s^-1 | 200 s^-1    | 2 s^-1       | 0.99999 uM  | 2 s^-1       | 100    |
| Rap1GTP ---Rap1GAP--> Rap1GDP                     | 0.00033667 #^-1.s^-1 | 200 s^-1    | 2 s^-1       | 0.99999 uM  | 2 s^-1       | 100    |
| MAPKK-ser ---bRaf_Rap1GTP--> MAPKK_star           | 1.5625e-05 #^-1.s^-1 | 1.2 s^-1    | 0.3 s^-1     | 0.16 uM     | 0.3 s^-1     | 4      |
| MAPKK ---bRaf_Rap1GTP--> MAPKK-ser                | 1.5625e-05 #^-1.s^-1 | 1.2 s^-1    | 0.3 s^-1     | 0.16 uM     | 0.3 s^-1     | 4      |
| MAPK-tyr ---MKP-1--> MAPK                         | 0.00025 #^-1.s^-1    | 16 s^-1     | 4 s^-1       | 0.13333 uM  | 4 s^-1       | 4      |
| MAPK_star ---MKP-1--> MAPK-tyr                    | 0.00025 #^-1.s^-1    | 16 s^-1     | 4 s^-1       | 0.13333 uM  | 4 s^-1       | 4      |
| craf-1_star ---PPhosphatase2A--> craf-1           | 3.1935e-06 #^-1.s^-1 | 24 s^-1     | 6 s^-1       | 15.657 uM   | 6 s^-1       | 4      |
| MAPKK_star ---PPhosphatase2A--> MAPKK-ser         | 3.1935e-06 #^-1.s^-1 | 24 s^-1     | 6 s^-1       | 15.657 uM   | 6 s^-1       | 4      |
| MAPKK-ser ---PPhosphatase2A--> MAPKK              | 3.1935e-06 #^-1.s^-1 | 24 s^-1     | 6 s^-1       | 15.657 uM   | 6 s^-1       | 4      |
| craf-1_star_star ---PPhosphatase2A--> craf-1_star | 3.1935e-06 #^-1.s^-1 | 24 s^-1     | 6 s^-1       | 15.657 uM   | 6 s^-1       | 4      |
| ppRSK ---PDK1--> active_RSK2                      | 8.3333e-07 #^-1.s^-1 | 4 s^-1      | 1 s^-1       | 10 uM       | 1 s^-1       | 4      |
| active_RSK2 ---PP2A--> ppRSK                      | 9.4692e-07 #^-1.s^-1 | 4 s^-1      | 1 s^-1       | 8.8005 uM   | 1 s^-1       | 4      |
| I1_star ---PP2A--> I1                             | 6.6e-06 #^-1.s^-1    | 25 s^-1     | 6 s^-1       | 7.8283 uM   | 6 s^-1       | 4.1667 |
| CaMKKp ---PP2A--> CaMKK_c                         | 1.1667e-06 #^-1.s^-1 | 2.8 s^-1    | 0.7 s^-1     | 4.9999 uM   | 0.7 s^-1     | 4      |
| pCaMKIV_CaM_Ca_c ---PP2A--> CaMKIV_CaM_Ca_c       | 1.8939e-06 #^-1.s^-1 | 8 s^-1      | 2 s^-1       | 8.8002 uM   | 2 s^-1       | 4      |
| pRSK ---PP2A--> RSK                               | 9.4692e-07 #^-1.s^-1 | 4 s^-1      | 1 s^-1       | 8.8005 uM   | 1 s^-1       | 4      |

|                                                       |                      |            |            |              |            |        |
|-------------------------------------------------------|----------------------|------------|------------|--------------|------------|--------|
| PP1-I1_star ---PP2A--> PP1-I1                         | 6.6e-06 #^-1.s^-1    | 25 s^-1    | 6 s^-1     | 7.8283 uM    | 6 s^-1     | 4.1667 |
| A_star ---PP1_active_n--> A                           | 2.2523e-06 #^-1.s^-1 | 0.4 s^-1   | 0.1 s^-1   | 0.99998 uM   | 0.1 s^-1   | 4      |
| B ---active_RSK2_n--> B_star                          | 4.5045e-07 #^-1.s^-1 | 0.4 s^-1   | 0.1 s^-1   | 5 uM         | 0.1 s^-1   | 4      |
| I1_star ---CaNAB-Ca4--> I1                            | 5.7e-08 #^-1.s^-1    | 0.136 s^-1 | 0.034 s^-1 | 4.9708 uM    | 0.034 s^-1 | 4      |
| B ---pMSK1_n--> B_star                                | 1.1261e-06 #^-1.s^-1 | 0.4 s^-1   | 0.1 s^-1   | 2 uM         | 0.1 s^-1   | 4      |
| pMSK1_n ---PP2An--> MSK1_n                            | 2.5594e-06 #^-1.s^-1 | 4 s^-1     | 1 s^-1     | 8.7999 uM    | 1 s^-1     | 4      |
| I1_star_n ---PP2An--> I1n                             | 1.7262e-05 #^-1.s^-1 | 24 s^-1    | 6 s^-1     | 7.8285 uM    | 6 s^-1     | 4      |
| PLC_g ---PLCg_basal--> PLC_g_star                     | 1.3889e-05 #^-1.s^-1 | 2 s^-1     | 0.5 s^-1   | 0.3 uM       | 0.5 s^-1   | 4      |
| Nucleotides ---Basal_transcription--> mRNA_clx        | 1.0416e-06 #^-1.s^-1 | 0.2 s^-1   | 0.05 s^-1  | 1.0812 uM    | 0.05 s^-1  | 4      |
| Nucleotides ---Basal_transcription--> mRNA_clx_CaMKIV | 1.0427e-06 #^-1.s^-1 | 0.2 s^-1   | 0.05 s^-1  | 1.08 uM      | 0.05 s^-1  | 4      |
| Nucleotides ---Basal_transcription--> PP1mRNA_clx     | 1.0427e-06 #^-1.s^-1 | 0.2 s^-1   | 0.05 s^-1  | 1.08 uM      | 0.05 s^-1  | 4      |
| C ---pCaMKIV_CaM_Ca_nuc--> C_star                     | 2.8665e-06 #^-1.s^-1 | 2.8 s^-1   | 0.7 s^-1   | 5.5 uM       | 0.7 s^-1   | 4      |
| GDP-Ras ---Shc_star.Sos.Grb2--> GTP-Ras               | 3.3e-05 #^-1.s^-1    | 0.8 s^-1   | 0.2 s^-1   | 0.050505 uM  | 0.2 s^-1   | 4      |
| Rap1GDP ---CRK_C3G_Cbl_star_clx--> Rap1GTP            | 6.6668e-05 #^-1.s^-1 | 0.2 s^-1   | 0.2 s^-1   | 0.0099998 uM | 0.2 s^-1   | 1      |
| Cbl ---Src_star--> Cbl_star                           | 0.00066665 #^-1.s^-1 | 160 s^-1   | 40 s^-1    | 0.50001 uM   | 40 s^-1    | 4      |
| MSK1_n ---MAPK_star_n--> pMSK1_n                      | 4.2496e-07 #^-1.s^-1 | 0.4 s^-1   | 0.1 s^-1   | 5.2999 uM    | 0.1 s^-1   | 4      |
| Sos ---MAPK_star--> Sos_star                          | 3.2552e-05 #^-1.s^-1 | 40 s^-1    | 10 s^-1    | 2.56 uM      | 10 s^-1    | 4      |
| RSK ---MAPK_star--> pRSK                              | 2.673e-06 #^-1.s^-1  | 6.8 s^-1   | 1.7 s^-1   | 5.2999 uM    | 1.7 s^-1   | 4      |
| craf-1_star ---MAPK_star--> craf-1_star_star          | 3.25e-06 #^-1.s^-1   | 40 s^-1    | 10 s^-1    | 25.641 uM    | 10 s^-1    | 4      |
| Nucleotides ---Transcription_clx--> mRNA_clx          | 1.0427e-06 #^-1.s^-1 | 0.2 s^-1   | 0.05 s^-1  | 1.08 uM      | 0.05 s^-1  | 4      |
| TORC1c ---SIK2--> pTORC1                              | 8.3333e-07 #^-1.s^-1 | 1.6 s^-1   | 0.4 s^-1   | 4 uM         | 0.4 s^-1   | 4      |
| I1_star ---CaM_Ca_n-CaNAB--> I1                       | 5.7e-07 #^-1.s^-1    | 1.36 s^-1  | 0.34 s^-1  | 4.9708 uM    | 0.34 s^-1  | 4      |
| pTORC1 ---CaM_Ca_n-CaNAB--> TORC1c                    | 2.0833e-06 #^-1.s^-1 | 0.4 s^-1   | 0.1 s^-1   | 0.40001 uM   | 0.1 s^-1   | 4      |
| PP1-I1_star ---CaM_Ca_n-CaNAB--> PP1-I1               | 5.7e-07 #^-1.s^-1    | 1.36 s^-1  | 0.34 s^-1  | 4.9708 uM    | 0.34 s^-1  | 4      |
| Nucleotides ---Transcription_Clx_C--> mRNA_clx_CaMKIV | 1.0427e-06 #^-1.s^-1 | 0.2 s^-1   | 0.05 s^-1  | 1.08 uM      | 0.05 s^-1  | 4      |
| A ---A_kinase--> A_star                               | 2.2524e-06 #^-1.s^-1 | 0.4 s^-1   | 0.1 s^-1   | 0.99998 uM   | 0.1 s^-1   | 4      |
| B_star ---B_phosphatase--> B                          | 2.2523e-06 #^-1.s^-1 | 0.4 s^-1   | 0.1 s^-1   | 0.99998 uM   | 0.1 s^-1   | 4      |
| C_star ---C_phosphatase--> C                          | 2.2524e-06 #^-1.s^-1 | 0.4 s^-1   | 0.1 s^-1   | 0.99998 uM   | 0.1 s^-1   | 4      |
| Nucleotides ---Transcr_clx_PP1--> PP1mRNA_clx         | 1.0427e-06 #^-1.s^-1 | 0.2 s^-1   | 0.05 s^-1  | 1.08 uM      | 0.05 s^-1  | 4      |

Pools for group /kinetics

| name           | InitialConc | buffered | Volume  |
|----------------|-------------|----------|---------|
| CaM-Ca4        | 0 uM        | 0        | 1000 fl |
| PKC-active     | 0.01 uM     | 1        | 1000 fl |
| PKA-active     | 0 uM        | 0        | 1000 fl |
| cAMP           | 0 uM        | 0        | 1000 fl |
| PKA-active_n   | 0 uM        | 0        | 370 fl  |
| Ca             | 0.08 uM     | 0        | 1000 fl |
| Src            | 0.02 uM     | 0        | 1000 fl |
| Cbl            | 0.5 uM      | 0        | 1000 fl |
| C3G            | 0.5 uM      | 0        | 1000 fl |
| CRK            | 1 uM        | 0        | 1000 fl |
| CRK_C3G        | 0 uM        | 0        | 1000 fl |
| Rap1GTP        | 0 uM        | 0        | 1000 fl |
| Rap1GDP        | 0.2 uM      | 0        | 1000 fl |
| Rap1GAP        | 0.012 uM    | 0        | 1000 fl |
| bRaf_Rap1GTP   | 0 uM        | 0        | 1000 fl |
| bRaf           | 0.2 uM      | 0        | 1000 fl |
| MKP-1          | 0.015 uM    | 0        | 1000 fl |
| PPhosphatase2A | 1 uM        | 0        | 1000 fl |
| MSK1_n         | 0.2 uM      | 0        | 370 fl  |
| PKD1           | 1 uM        | 0        | 1000 fl |
| PP2A           | 0.15 uM     | 1        | 1000 fl |
| PP1_active_n   | 0 uM        | 0        | 370 fl  |
| ppRSK          | 0 uM        | 0        | 1000 fl |
| active_RSK2    | 0 uM        | 0        | 1000 fl |

|                      |           |   |           |
|----------------------|-----------|---|-----------|
| active_RSK2_n        | 0 uM      | 0 | 370 fl    |
| RSK                  | 0.2 uM    | 0 | 1000 fl   |
| pRSK                 | 0 uM      | 0 | 1000 fl   |
| BetaGamma            | 0 uM      | 0 | 1000 fl   |
| CaNAB-Ca4            | 0 uM      | 0 | 1000 fl   |
| PP1-active_c         | 1.8 uM    | 0 | 1000 fl   |
| pMSK1_n              | 0 uM      | 0 | 370 fl    |
| Ca_input             | 0 uM      | 0 | 1000 fl   |
| PP2An                | 0.1 uM    | 0 | 370 fl    |
| BDNF                 | 5e-05 uM  | 1 | 999.97 fl |
| PLC_g                | 0.1 uM    | 0 | 1000 fl   |
| PLCg_basal           | 0.0007 uM | 0 | 1000 fl   |
| Grb2                 | 1 uM      | 0 | 1000 fl   |
| Shc                  | 0.5 uM    | 0 | 1000 fl   |
| Sos                  | 0.1 uM    | 0 | 1000 fl   |
| Sos.Grb2             | 0 uM      | 0 | 1000 fl   |
| CBP                  | 0.5 uM    | 0 | 370 fl    |
| mRNA_clx             | 0 uM      | 0 | 370 fl    |
| Basal_transcription  | 5e-05 uM  | 0 | 370 fl    |
| mRNA                 | 0 uM      | 0 | 370 fl    |
| degraded_mRNA        | 0 uM      | 1 | 370 fl    |
| Basal_CaMKIV         | 0.0005 uM | 0 | 1000 fl   |
| pCaMKIV_CaM_Ca_nuc   | 0 uM      | 0 | 370 fl    |
| pCaMKIV_CaM_Ca_n     | 0 uM      | 0 | 370 fl    |
| Basal_CaMKIV_n       | 5e-05 uM  | 0 | 370 fl    |
| Sum_total_CaMKIV     | 0 uM      | 0 | 1000 fl   |
| MAPK_active_total    | 0 uM      | 0 | 1000 fl   |
| Basal_MAPK_active    | 0.0001 uM | 0 | 1000 fl   |
| Shc_star             | 0 uM      | 0 | 1000 fl   |
| PLC_g_star           | 0 uM      | 0 | 1000 fl   |
| Sos_star             | 0 uM      | 0 | 1000 fl   |
| Shc_star.Sos.Grb2    | 0 uM      | 0 | 1000 fl   |
| Sos_star.Grb2        | 0 uM      | 0 | 1000 fl   |
| CRK_C3G_Cbl_star_clx | 0 uM      | 0 | 1000 fl   |
| Cbl_star             | 0 uM      | 0 | 1000 fl   |
| Src_star             | 0 uM      | 0 | 1000 fl   |
| MAPK_star_n          | 0 uM      | 0 | 370 fl    |
| MAPK_star            | 0 uM      | 0 | 1000 fl   |
| pTORC1               | 0 uM      | 0 | 1000 fl   |
| TORC1n               | 0 uM      | 0 | 370 fl    |
| TORC1c               | 0.1 uM    | 0 | 1000 fl   |
| CBP_pCREB_CRE        | 0 uM      | 0 | 370 fl    |
| Transcription_clx    | 0 uM      | 0 | 370 fl    |
| Nucleotides          | 0.2 uM    | 1 | 369.98 fl |
| SIK2                 | 0.5 uM    | 0 | 1000 fl   |
| SIK2_star            | 0 uM      | 0 | 1000 fl   |
| PP1-I1n              | 0 uM      | 0 | 370 fl    |
| I1n                  | 0 uM      | 0 | 370 fl    |
| I1_star_n            | 0 uM      | 0 | 369.98 fl |
| CaM_Ca_n-CaNAB       | 0 uM      | 0 | 1000 fl   |
| CBP_pCREB_CaMKIV     | 0 uM      | 0 | 370 fl    |
| Transcription_Clx_C  | 0 uM      | 0 | 370 fl    |
| mRNA_clx_CaMKIV      | 0 uM      | 0 | 370 fl    |
| mRNA_CaMKIV          | 0 uM      | 0 | 370 fl    |
| deg_mRNA_CaMKIV      | 0 uM      | 1 | 370 fl    |
| B                    | 0.1 uM    | 0 | 370 fl    |

|                  |        |   |           |
|------------------|--------|---|-----------|
| B_star           | 0 uM   | 0 | 370 fl    |
| C                | 0.1 uM | 0 | 370 fl    |
| C_star           | 0 uM   | 0 | 370 fl    |
| A_star           | 0 uM   | 0 | 370 fl    |
| A                | 0.1 uM | 0 | 369.98 fl |
| A_kinase         | 0.1 uM | 0 | 369.98 fl |
| CREB             | 0.5 uM | 0 | 370 fl    |
| B_phosphatase    | 0.1 uM | 0 | 370 fl    |
| C_phosphatase    | 0.1 uM | 0 | 369.98 fl |
| MAPKstar_CREB    | 0 uM   | 0 | 370 fl    |
| CaMKIVstar_CREB  | 0 uM   | 0 | 370 fl    |
| PP1star_CREB     | 0 uM   | 0 | 370 fl    |
| CBP_pCREB_PP1    | 0 uM   | 0 | 369.98 fl |
| Transcr_clx_PP1  | 0 uM   | 0 | 370 fl    |
| PP1mRNA_clx      | 0 uM   | 0 | 370 fl    |
| PP1_mRNA         | 0 uM   | 0 | 370 fl    |
| deg_PP1mRNA      | 0 uM   | 1 | 370 fl    |
| total_PP1_active | 0 uM   | 0 | 1000 fl   |

Equations for group /kinetics/PKA

Reactions for group /kinetics/PKA

| Reaction                                        | kf                  | kb                   | Kf                | Kb                |
|-------------------------------------------------|---------------------|----------------------|-------------------|-------------------|
| R2C2 + cAMP <====> R2C2-cAMP                    | 9e-05 #^-1.s^-1     | 33 s^-1              | 54 uM^-1.s^-1     | 33 s^-1           |
| R2C2-cAMP + cAMP <====> R2C2-cAMP2              | 9e-05 #^-1.s^-1     | 33 s^-1              | 54 uM^-1.s^-1     | 33 s^-1           |
| R2C2-cAMP2 + cAMP <====> R2C2-cAMP3             | 0.000125 #^-1.s^-1  | 110 s^-1             | 75 uM^-1.s^-1     | 110 s^-1          |
| cAMP + R2C2-cAMP3 <====> R2C2-cAMP4             | 0.000125 #^-1.s^-1  | 32.5 s^-1            | 75 uM^-1.s^-1     | 32.5 s^-1         |
| R2C2-cAMP4 <====> PKA-active + R2C-cAMP4        | 60 s^-1             | 3e-05 #^-1.s^-1      | 60 s^-1           | 18 uM^-1.s^-1     |
| R2C-cAMP4 <====> PKA-active + R2-cAMP4          | 60 s^-1             | 3e-05 #^-1.s^-1      | 60 s^-1           | 18 uM^-1.s^-1     |
| R2-cAMP4 <====> R2 + cAMP                       | 0.0005 s^-1         | 1.6667e-10 #^-1.s^-1 | 0.0005 s^-1       | 0.0001 uM^-1.s^-1 |
| PKA-active + R2 <====> R2C1                     | 0.0013317 #^-1.s^-1 | 0.186 s^-1           | 799.02 uM^-1.s^-1 | 0.186 s^-1        |
| PKA-active + R2C1 <====> R2C2                   | 0.0013317 #^-1.s^-1 | 0.186 s^-1           | 799.02 uM^-1.s^-1 | 0.186 s^-1        |
| PKA-active + PKA-inhibitor <====> inhibited-PKA | 0.0001 #^-1.s^-1    | 1 s^-1               | 60 uM^-1.s^-1     | 1 s^-1            |
| PKA-active <====> PKA-active_n                  | 0.000305 s^-1       | 0.00125 s^-1         | 0.000305 s^-1     | 0.00125 s^-1      |

Pools for group /kinetics/PKA

| name          | InitialConc | buffered | Volume  |
|---------------|-------------|----------|---------|
| R2C2          | 0.5 uM      | 0        | 1000 fl |
| R2C2-cAMP     | 0 uM        | 0        | 1000 fl |
| R2C2-cAMP2    | 0 uM        | 0        | 1000 fl |
| R2C2-cAMP3    | 0 uM        | 0        | 1000 fl |
| R2C2-cAMP4    | 0 uM        | 0        | 1000 fl |
| R2C-cAMP4     | 0 uM        | 0        | 1000 fl |
| R2-cAMP4      | 0 uM        | 0        | 1000 fl |
| R2            | 0 uM        | 0        | 1000 fl |
| R2C1          | 0 uM        | 0        | 1000 fl |
| inhibited-PKA | 0 uM        | 0        | 1000 fl |
| PKA-inhibitor | 0.25 uM     | 0        | 1000 fl |

Equations for group /kinetics/AC

Reactions for group /kinetics/AC

| Reaction                       | kf                   | kb     | Kf             | Kb     |
|--------------------------------|----------------------|--------|----------------|--------|
| CaM-Ca4 + AC1 <====> AC1-CaM   | 8.3333e-05 #^-1.s^-1 | 1 s^-1 | 50 uM^-1.s^-1  | 1 s^-1 |
| AC2_star <====> AC2            | 0.1 s^-1             | 0 s^-1 | 0.1 s^-1       | 0 s^-1 |
| cAMP-PDE_star <====> cAMP-PDE  | 0.1 s^-1             | 0 s^-1 | 0.1 s^-1       | 0 s^-1 |
| PDE1 + CaM-Ca4 <====> CaM.PDE1 | 0.0012 #^-1.s^-1     | 5 s^-1 | 720 uM^-1.s^-1 | 5 s^-1 |

Enzymes for group /kinetics/AC

| Enzyme-reaction              | k1                | k2        | k3         | Km        | kcat       | ratio  |
|------------------------------|-------------------|-----------|------------|-----------|------------|--------|
| ATP ---AC1-CaM--> cAMP       | 7.5e-06 #^-1.s^-1 | 72 s^-1   | 18 s^-1    | 20 uM     | 18 s^-1    | 4      |
| cAMP ---cAMP-PDE--> AMP      | 4.2e-06 #^-1.s^-1 | 40 s^-1   | 10 s^-1    | 19.841 uM | 10 s^-1    | 4      |
| cAMP ---PDE1--> AMP          | 3.5e-07 #^-1.s^-1 | 6.67 s^-1 | 1.667 s^-1 | 39.7 uM   | 1.667 s^-1 | 4.0012 |
| cAMP ---CaM.PDE1--> AMP      | 2.1e-06 #^-1.s^-1 | 40 s^-1   | 10 s^-1    | 39.683 uM | 10 s^-1    | 4      |
| ATP ---AC2_star--> cAMP      | 2.9e-06 #^-1.s^-1 | 28 s^-1   | 7 s^-1     | 20.115 uM | 7 s^-1     | 4      |
| cAMP ---cAMP-PDE_star--> AMP | 8.4e-06 #^-1.s^-1 | 80 s^-1   | 20 s^-1    | 19.841 uM | 20 s^-1    | 4      |

Pools for group /kinetics/AC

| name          | InitialConc   | buffered | Volume       |
|---------------|---------------|----------|--------------|
| ATP           | 5000 uM       | 1        | 1000 fl      |
| AC1-CaM       | 0 uM          | 0        | 1000 fl      |
| AC1           | 0.02 uM       | 0        | 1000 fl      |
| AC2           | 0.015 uM      | 0        | 1000 fl      |
| AMP           | 3.2549e+05 uM | 0        | 0.0016667 fl |
| cAMP-PDE      | 0.45 uM       | 0        | 1000 fl      |
| PDE1          | 2 uM          | 0        | 1000 fl      |
| CaM.PDE1      | 0 uM          | 0        | 1000 fl      |
| AC2_star      | 0 uM          | 0        | 1000 fl      |
| cAMP-PDE_star | 0 uM          | 0        | 1000 fl      |

Equations for group /kinetics/CaM

Reactions for group /kinetics/CaM

| Reaction                    | kf                   | kb          | Kf                 | Kb          |
|-----------------------------|----------------------|-------------|--------------------|-------------|
| CaM-Ca3 + Ca <====> CaM-Ca4 | 7.7501e-07 #^-1.s^-1 | 10 s^-1     | 0.46501 uM^-1.s^-1 | 10 s^-1     |
| CaM + Ca <====> CaM-Ca      | 1.4141e-05 #^-1.s^-1 | 8.4853 s^-1 | 8.4846 uM^-1.s^-1  | 8.4853 s^-1 |
| CaM-Ca2 + Ca <====> CaM-Ca3 | 6.0001e-06 #^-1.s^-1 | 10 s^-1     | 3.6001 uM^-1.s^-1  | 10 s^-1     |
| CaM-Ca + Ca <====> CaM-Ca2  | 1.4141e-05 #^-1.s^-1 | 8.4853 s^-1 | 8.4846 uM^-1.s^-1  | 8.4853 s^-1 |

Pools for group /kinetics/CaM

| name    | InitialConc | buffered | Volume  |
|---------|-------------|----------|---------|
| CaM     | 20 uM       | 0        | 1000 fl |
| CaM-Ca3 | 0 uM        | 0        | 1000 fl |
| CaM-Ca2 | 0 uM        | 0        | 1000 fl |
| CaM-Ca  | 0 uM        | 0        | 1000 fl |

Equations for group /kinetics/creb

Equations for group /kinetics/MAPK

Reactions for group /kinetics/MAPK

| Reaction                                      | kf                   | kb       | Kf                | Kb       |
|-----------------------------------------------|----------------------|----------|-------------------|----------|
| craf-1 + GTP-Ras <====> Raf-GTP-Ras           | 1e-05 #^-1.s^-1      | 1 s^-1   | 6 uM^-1.s^-1      | 1 s^-1   |
| craf-1_star + GTP-Ras <====> Raf_star-GTP-Ras | 1.6666e-05 #^-1.s^-1 | 0.5 s^-1 | 9.9996 uM^-1.s^-1 | 0.5 s^-1 |
| bRaf + GTP-Ras <====> braf-GTP-Ras            | 0.0001 #^-1.s^-1     | 0.5 s^-1 | 60 uM^-1.s^-1     | 0.5 s^-1 |

Enzymes for group /kinetics/MAPK

| Enzyme-reaction                             | k1                   | k2       | k3       | Km          | kcat     | ratio |
|---------------------------------------------|----------------------|----------|----------|-------------|----------|-------|
| MAPKK ---Raf-GTP-Ras--> MAPKK-ser           | 1.5714e-05 #^-1.s^-1 | 1.2 s^-1 | 0.3 s^-1 | 0.15909 uM  | 0.3 s^-1 | 4     |
| MAPKK-ser ---Raf-GTP-Ras--> MAPKK_star      | 1.5714e-05 #^-1.s^-1 | 1.2 s^-1 | 0.3 s^-1 | 0.15909 uM  | 0.3 s^-1 | 4     |
| MAPKK-ser ---braf-GTP-Ras--> MAPKK_star     | 1.0417e-05 #^-1.s^-1 | 0.8 s^-1 | 0.2 s^-1 | 0.15999 uM  | 0.2 s^-1 | 4     |
| MAPKK ---braf-GTP-Ras--> MAPKK-ser          | 1.0417e-05 #^-1.s^-1 | 0.8 s^-1 | 0.2 s^-1 | 0.15999 uM  | 0.2 s^-1 | 4     |
| MAPKK-ser ---Raf_star-GTP-Ras--> MAPKK_star | 1.5714e-05 #^-1.s^-1 | 1.2 s^-1 | 0.3 s^-1 | 0.15909 uM  | 0.3 s^-1 | 4     |
| MAPKK ---Raf_star-GTP-Ras--> MAPKK-ser      | 1.5714e-05 #^-1.s^-1 | 1.2 s^-1 | 0.3 s^-1 | 0.15909 uM  | 0.3 s^-1 | 4     |
| MAPK ---MAPKK_star--> MAPK-tyr              | 5.4e-05 #^-1.s^-1    | 1.2 s^-1 | 0.3 s^-1 | 0.046296 uM | 0.3 s^-1 | 4     |
| MAPK-tyr ---MAPKK_star--> MAPK_star         | 5.4e-05 #^-1.s^-1    | 1.2 s^-1 | 0.3 s^-1 | 0.046296 uM | 0.3 s^-1 | 4     |

Pools for group /kinetics/MAPK

| name             | InitialConc | buffered | Volume  |
|------------------|-------------|----------|---------|
| craf-1           | 0.2 uM      | 0        | 1000 fl |
| MAPKK            | 0.18 uM     | 0        | 1000 fl |
| MAPK             | 0.36 uM     | 0        | 1000 fl |
| MAPK-tyr         | 0 uM        | 0        | 1000 fl |
| MAPKK-ser        | 0 uM        | 0        | 1000 fl |
| Raf-GTP-Ras      | 0 uM        | 0        | 1000 fl |
| braf-GTP-Ras     | 0 uM        | 0        | 1000 fl |
| craf-1_star      | 0 uM        | 0        | 1000 fl |
| craf-1_star_star | 0 uM        | 0        | 1000 fl |
| Raf_star-GTP-Ras | 0 uM        | 0        | 1000 fl |
| MAPKK_star       | 0 uM        | 0        | 1000 fl |

Equations for group /kinetics/Ras

Reactions for group /kinetics/Ras

| Reaction                                  | kf               | kb     | Kf            | Kb     |
|-------------------------------------------|------------------|--------|---------------|--------|
| BetaGamma + inact-GEF <====> GEF-Gprot-bg | 1e-05 #^-1.s^-1  | 1 s^-1 | 6 uM^-1.s^-1  | 1 s^-1 |
| GEF_star <====> inact-GEF                 | 1 s^-1           | 0 s^-1 | 1 s^-1        | 0 s^-1 |
| GTP-Ras <====> GDP-Ras                    | 0.0001 s^-1      | 0 s^-1 | 0.0001 s^-1   | 0 s^-1 |
| GAP_star <====> GAP                       | 0.1 s^-1         | 0 s^-1 | 0.1 s^-1      | 0 s^-1 |
| inact-GEF + CaM-Ca4 <====> CaM-GEF        | 0.0001 #^-1.s^-1 | 1 s^-1 | 60 uM^-1.s^-1 | 1 s^-1 |
| inact-GEF_star <====> inact-GEF           | 1 s^-1           | 0 s^-1 | 1 s^-1        | 0 s^-1 |

Enzymes for group /kinetics/Ras

| Enzyme-reaction                    | k1                   | k2        | k3        | Km         | kcat      | ratio |
|------------------------------------|----------------------|-----------|-----------|------------|-----------|-------|
| GDP-Ras ---GEF-Gprot-bg--> GTP-Ras | 3.3e-07 #^-1.s^-1    | 0.08 s^-1 | 0.02 s^-1 | 0.50505 uM | 0.02 s^-1 | 4     |
| GTP-Ras ---GAP--> GDP-Ras          | 8.2476e-05 #^-1.s^-1 | 40 s^-1   | 10 s^-1   | 1.0104 uM  | 10 s^-1   | 4     |
| GDP-Ras ---CaM-GEF--> GTP-Ras      | 3.3e-07 #^-1.s^-1    | 0.08 s^-1 | 0.02 s^-1 | 0.50505 uM | 0.02 s^-1 | 4     |
| GDP-Ras ---GEF_star--> GTP-Ras     | 3.3e-07 #^-1.s^-1    | 0.08 s^-1 | 0.02 s^-1 | 0.50505 uM | 0.02 s^-1 | 4     |

Pools for group /kinetics/Ras

| name           | InitialConc | buffered | Volume  |
|----------------|-------------|----------|---------|
| GEF-Gprot-bg   | 0 uM        | 0        | 1000 fl |
| inact-GEF      | 0.1 uM      | 0        | 1000 fl |
| GTP-Ras        | 0 uM        | 0        | 1000 fl |
| GDP-Ras        | 0.5 uM      | 0        | 1000 fl |
| GAP            | 0.01 uM     | 0        | 1000 fl |
| CaM-GEF        | 0 uM        | 0        | 1000 fl |
| GEF_star       | 0 uM        | 0        | 1000 fl |
| inact-GEF_star | 0 uM        | 0        | 1000 fl |
| GAP_star       | 0 uM        | 0        | 1000 fl |

-----

Equations for group /kinetics/PP1

Reactions for group /kinetics/PP1

| Reaction                                  | kf                   | kb          | Kf                | Kb           |
|-------------------------------------------|----------------------|-------------|-------------------|--------------|
| I1_star + PP1-active_c <====> PP1-I1_star | 0.00083329 #^-1.s^-1 | 0.1 s^-1    | 499.97 uM^-1.s^-1 | 0.1 s^-1     |
| PP1-I1 <====> PP1-active_c + I1           | 1 s^-1               | 0 #^-1.s^-1 | 1 s^-1            | 0 uM^-1.s^-1 |

Pools for group /kinetics/PP1

| name        | InitialConc | buffered | Volume  |
|-------------|-------------|----------|---------|
| I1          | 1.8 uM      | 0        | 1000 fl |
| PP1-I1      | 0 uM        | 0        | 1000 fl |
| I1_star     | 0.001 uM    | 0        | 1000 fl |
| PP1-I1_star | 0 uM        | 0        | 1000 fl |

-----

Equations for group /kinetics/PP2B

Reactions for group /kinetics/PP2B

| Reaction                                | kf                   | kb     | Kf                | Kb     |
|-----------------------------------------|----------------------|--------|-------------------|--------|
| 2 Ca + CaNAB-Ca2 <====> CaNAB-Ca4       | 9.9998e-12 #^-2.s^-1 | 1 s^-1 | 3.5999 uM^-2.s^-1 | 1 s^-1 |
| CaNAB + 2 Ca <====> CaNAB-Ca2           | 2.7801e-08 #^-2.s^-1 | 1 s^-1 | 10008 uM^-2.s^-1  | 1 s^-1 |
| CaNAB-Ca4 + CaM-Ca2 <====> CaMCA2-CANAB | 4e-07 #^-1.s^-1      | 1 s^-1 | 0.24 uM^-1.s^-1   | 1 s^-1 |
| CaNAB-Ca4 + CaM-Ca3 <====> CaMCA3-CaNAB | 3.73e-06 #^-1.s^-1   | 1 s^-1 | 2.238 uM^-1.s^-1  | 1 s^-1 |
| CaM-Ca4 + CaNAB-Ca4 <====> CaMCA4-CaNAB | 0.001 #^-1.s^-1      | 1 s^-1 | 600 uM^-1.s^-1    | 1 s^-1 |

Pools for group /kinetics/PP2B

| name         | InitialConc | buffered | Volume  |
|--------------|-------------|----------|---------|
| CaNAB        | 1 uM        | 0        | 1000 fl |
| CaNAB-Ca2    | 0 uM        | 0        | 1000 fl |
| CaMCA3-CaNAB | 0 uM        | 0        | 1000 fl |
| CaMCA2-CANAB | 0 uM        | 0        | 1000 fl |
| CaMCA4-CaNAB | 0 uM        | 0        | 1000 fl |

-----

Equations for group /kinetics/camkiv

Reactions for group /kinetics/camkiv

| Reaction | kf | kb | Kf | Kb |
|----------|----|----|----|----|
|----------|----|----|----|----|



|                                          |                    |            |                    |            |
|------------------------------------------|--------------------|------------|--------------------|------------|
| CaM-Ca4 + CaMKIVc <====> CaMKIV_CaM_Ca_c | 2.22e-08 #^-1.s^-1 | 0.01 s^-1  | 0.01332 uM^-1.s^-1 | 0.01 s^-1  |
| CaM-Ca4 + CaMKK_c <====> CaMKK_CaM_Ca_c  | 6.75e-06 #^-1.s^-1 | 0.02 s^-1  | 4.05 uM^-1.s^-1    | 0.02 s^-1  |
| pCaMKIV_CaM_Ca_c <====> pCaMKIV_CaM_Ca_n | 0.0009 s^-1        | 0.007 s^-1 | 0.0009 s^-1        | 0.007 s^-1 |

Enzymes for group /kinetics/camkiv

| Enzyme-reaction                                | k1                   | k2       | k3       | Km     | kcat     | ratio |
|------------------------------------------------|----------------------|----------|----------|--------|----------|-------|
| CaMKIV_CaM_Ca_c ---CaMKK_CaM_Ca_c-> pCaMKIV_Ca | 7.0513e-06 #^-1.s^-1 | 4.4 s^-1 | 1.1 s^-1 | 1.3 uM | 1.1 s^-1 | 4     |

Pools for group /kinetics/camkiv

| name                 | InitialConc | buffered | Volume  |
|----------------------|-------------|----------|---------|
| pCaMKIV_CaM_Ca_c     | 0 uM        | 0        | 1000 fl |
| CaMKIVc              | 1 uM        | 0        | 1000 fl |
| CaMKKp               | 0 uM        | 0        | 1000 fl |
| CaMKK_c              | 0.5 uM      | 0        | 1000 fl |
| CaMKK_CaM_Ca_c       | 0 uM        | 0        | 1000 fl |
| CaMKIV_CaM_Ca_c      | 0 uM        | 0        | 1000 fl |
| pCaMKIV_CaM_Ca_c_tot | 0 uM        | 0        | 1000 fl |

Equations for group /kinetics/TrkB\_mod

Reactions for group /kinetics/TrkB\_mod

| Reaction                                             | kf                   | kb          | Kf                 | Kb           |
|------------------------------------------------------|----------------------|-------------|--------------------|--------------|
| BDNF_TrkB2_clx <====> BDNF_TrkB2_star_clx            | 0.02 s^-1            | 0 s^-1      | 0.02 s^-1          | 0 s^-1       |
| BDNF_TrkB_clx + TrkB <====> BDNF_TrkB2_clx           | 1.6667e-06 #^-1.s^-1 | 0.02 s^-1   | 0.99999 uM^-1.s^-1 | 0.02 s^-1    |
| TrkB + BDNF <====> BDNF_TrkB_clx                     | 1.6668e-06 #^-1.s^-1 | 0.05 s^-1   | 1 uM^-1.s^-1       | 0.05 s^-1    |
| BDNF_TrkB2_star_clx <====> 2 Int_BDNF_TrkB2_star_clx | 0.01 s^-1            | 0 #^-1.s^-1 | 0.01 s^-1          | 0 uM^-1.s^-1 |
| Int_BDNF_TrkB2_star_clx <====> TrkB                  | 0.001 s^-1           | 0.001 s^-1  | 0.001 s^-1         | 0.001 s^-1   |
| PLC_g_star <====> PLC_g                              | 0.07 s^-1            | 0 s^-1      | 0.07 s^-1          | 0 s^-1       |

Enzymes for group /kinetics/TrkB\_mod

| Enzyme-reaction                           | k1                   | k2       | k3       | Km         | kcat     | ratio |
|-------------------------------------------|----------------------|----------|----------|------------|----------|-------|
| PLC_g ---BDNF_TrkB2_star_clx-> PLC_g_star | 1.3889e-05 #^-1.s^-1 | 2 s^-1   | 0.5 s^-1 | 0.30001 uM | 0.5 s^-1 | 4     |
| Shc ---BDNF_TrkB2_star_clx-> Shc_star     | 3.0003e-06 #^-1.s^-1 | 1.2 s^-1 | 0.3 s^-1 | 0.83328 uM | 0.3 s^-1 | 4     |

Pools for group /kinetics/TrkB\_mod

| name                    | InitialConc | buffered | Volume    |
|-------------------------|-------------|----------|-----------|
| TrkB                    | 0.25 uM     | 0        | 999.93 fl |
| BDNF_TrkB2_clx          | 0 uM        | 0        | 999.97 fl |
| BDNF_TrkB_clx           | 0 uM        | 0        | 999.93 fl |
| BDNF_TrkB2_star_clx     | 0 uM        | 0        | 999.97 fl |
| Int_BDNF_TrkB2_star_clx | 0.25 uM     | 1        | 1000 fl   |

Same data sorting by data type:

Equations for group ###[]

Reactions for group ###[]

| Reaction                                            | kf                                          | kb                                          | Kf                                        | Kb                                       |
|-----------------------------------------------------|---------------------------------------------|---------------------------------------------|-------------------------------------------|------------------------------------------|
| Src_star <====> Src                                 | 100 s <sup>-1</sup>                         | 0.1 s <sup>-1</sup>                         | 100 s <sup>-1</sup>                       | 0.1 s <sup>-1</sup>                      |
| Cbl_star <====> Cbl                                 | 10 s <sup>-1</sup>                          | 0.01 s <sup>-1</sup>                        | 10 s <sup>-1</sup>                        | 0.01 s <sup>-1</sup>                     |
| C3G + CRK <====> CRK_C3G                            | 1.6667e-06 # <sup>-1</sup> .s <sup>-1</sup> | 0.002 s <sup>-1</sup>                       | 1 uM <sup>-1</sup> .s <sup>-1</sup>       | 0.002 s <sup>-1</sup>                    |
| Rap1GTP <====> Rap1GDP                              | 0.0001 s <sup>-1</sup>                      | 0 s <sup>-1</sup>                           | 0.0001 s <sup>-1</sup>                    | 0 s <sup>-1</sup>                        |
| Rap1GTP + bRaf <====> bRaf_Rap1GTP                  | 0.0001 # <sup>-1</sup> .s <sup>-1</sup>     | 0.5 s <sup>-1</sup>                         | 60 uM <sup>-1</sup> .s <sup>-1</sup>      | 0.5 s <sup>-1</sup>                      |
| MAPK_star <====> MAPK_star_n                        | 0.0001 s <sup>-1</sup>                      | 0.003 s <sup>-1</sup>                       | 0.0001 s <sup>-1</sup>                    | 0.003 s <sup>-1</sup>                    |
| active_RSK2 <====> active_RSK2_n                    | 0.001 s <sup>-1</sup>                       | 0.005 s <sup>-1</sup>                       | 0.001 s <sup>-1</sup>                     | 0.005 s <sup>-1</sup>                    |
| pRSK <====> ppRSK                                   | 0.1 s <sup>-1</sup>                         | 10 s <sup>-1</sup>                          | 0.1 s <sup>-1</sup>                       | 10 s <sup>-1</sup>                       |
| Ca_input <====> Ca                                  | 100 s <sup>-1</sup>                         | 100 s <sup>-1</sup>                         | 100 s <sup>-1</sup>                       | 100 s <sup>-1</sup>                      |
| Grb2 + Sos <====> Sos.Grb2                          | 4.1667e-07 # <sup>-1</sup> .s <sup>-1</sup> | 0.0168 s <sup>-1</sup>                      | 0.25 uM <sup>-1</sup> .s <sup>-1</sup>    | 0.0168 s <sup>-1</sup>                   |
| Sos.Grb2 + Shc_star <====> Shc_star.Sos.Grb2        | 8.3333e-06 # <sup>-1</sup> .s <sup>-1</sup> | 0.1 s <sup>-1</sup>                         | 5 uM <sup>-1</sup> .s <sup>-1</sup>       | 0.1 s <sup>-1</sup>                      |
| Sos_star <====> Sos                                 | 0.001 s <sup>-1</sup>                       | 0.1 s <sup>-1</sup>                         | 0.001 s <sup>-1</sup>                     | 0.1 s <sup>-1</sup>                      |
| CBP + MAPKstar_CREB <====> CBP_pCREB_CRE            | 5.1351e-07 # <sup>-1</sup> .s <sup>-1</sup> | 0.025 s <sup>-1</sup>                       | 0.114 uM <sup>-1</sup> .s <sup>-1</sup>   | 0.025 s <sup>-1</sup>                    |
| mRNA_clx <====> mRNA                                | 1.44 s <sup>-1</sup>                        | 0.0001 s <sup>-1</sup>                      | 1.44 s <sup>-1</sup>                      | 0.0001 s <sup>-1</sup>                   |
| mRNA <====> degraded_mRNA                           | 1 s <sup>-1</sup>                           | 0 s <sup>-1</sup>                           | 1 s <sup>-1</sup>                         | 0 s <sup>-1</sup>                        |
| Cbl_star + CRK_C3G <====> CRK_C3G_Cbl_star_clx      | 1.6667e-06 # <sup>-1</sup> .s <sup>-1</sup> | 0.2 s <sup>-1</sup>                         | 1 uM <sup>-1</sup> .s <sup>-1</sup>       | 0.2 s <sup>-1</sup>                      |
| Grb2 + Sos_star <====> Sos_star.Grb2                | 4.1667e-08 # <sup>-1</sup> .s <sup>-1</sup> | 0.0168 s <sup>-1</sup>                      | 0.025 uM <sup>-1</sup> .s <sup>-1</sup>   | 0.0168 s <sup>-1</sup>                   |
| TORC1c <====> TORC1n                                | 0.01 s <sup>-1</sup>                        | 0.001 s <sup>-1</sup>                       | 0.01 s <sup>-1</sup>                      | 0.001 s <sup>-1</sup>                    |
| TORC1n + CBP_pCREB_CRE <====> Transcription_clx     | 4.5045e-06 # <sup>-1</sup> .s <sup>-1</sup> | 0.1 s <sup>-1</sup>                         | 1 uM <sup>-1</sup> .s <sup>-1</sup>       | 0.1 s <sup>-1</sup>                      |
| SIK2_star <====> SIK2                               | 0.1 s <sup>-1</sup>                         | 0 s <sup>-1</sup>                           | 0.1 s <sup>-1</sup>                       | 0 s <sup>-1</sup>                        |
| PP1-I1n <====> PP1_active_n + I1n                   | 1 s <sup>-1</sup>                           | 9.009e-06 # <sup>-1</sup> .s <sup>-1</sup>  | 1 s <sup>-1</sup>                         | 2 uM <sup>-1</sup> .s <sup>-1</sup>      |
| PP1-I1 <====> PP1-I1n                               | 0.003 s <sup>-1</sup>                       | 0.003 s <sup>-1</sup>                       | 0.003 s <sup>-1</sup>                     | 0.003 s <sup>-1</sup>                    |
| PP1_active_n + I1n <====> PP1-I1n                   | 2.2521e-06 # <sup>-1</sup> .s <sup>-1</sup> | 0.1 s <sup>-1</sup>                         | 0.49997 uM <sup>-1</sup> .s <sup>-1</sup> | 0.1 s <sup>-1</sup>                      |
| Shc_star <====> Shc                                 | 0.2 s <sup>-1</sup>                         | 0 s <sup>-1</sup>                           | 0.2 s <sup>-1</sup>                       | 0 s <sup>-1</sup>                        |
| CBP + CaMKIVstar_CREB <====> CBP_pCREB_CaMKIV       | 5.1351e-07 # <sup>-1</sup> .s <sup>-1</sup> | 0.025 s <sup>-1</sup>                       | 0.114 uM <sup>-1</sup> .s <sup>-1</sup>   | 0.025 s <sup>-1</sup>                    |
| CBP_pCREB_CaMKIV + TORC1n <====> Transcription_Clx_ | 4.5045e-06 # <sup>-1</sup> .s <sup>-1</sup> | 0.1 s <sup>-1</sup>                         | 1 uM <sup>-1</sup> .s <sup>-1</sup>       | 0.1 s <sup>-1</sup>                      |
| mRNA_clx_CaMKIV <====> mRNA_CaMKIV                  | 1.44 s <sup>-1</sup>                        | 0.0001 s <sup>-1</sup>                      | 1.44 s <sup>-1</sup>                      | 0.0001 s <sup>-1</sup>                   |
| mRNA_CaMKIV <====> deg_mRNA_CaMKIV                  | 1 s <sup>-1</sup>                           | 0 s <sup>-1</sup>                           | 1 s <sup>-1</sup>                         | 0 s <sup>-1</sup>                        |
| A_star + CREB <====> PP1star_CREB                   | 4.5045e-06 # <sup>-1</sup> .s <sup>-1</sup> | 0.1 s <sup>-1</sup>                         | 1 uM <sup>-1</sup> .s <sup>-1</sup>       | 0.1 s <sup>-1</sup>                      |
| CREB + B_star <====> MAPKstar_CREB                  | 4.5045e-06 # <sup>-1</sup> .s <sup>-1</sup> | 0.1 s <sup>-1</sup>                         | 1 uM <sup>-1</sup> .s <sup>-1</sup>       | 0.1 s <sup>-1</sup>                      |
| C_star + CREB <====> CaMKIVstar_CREB                | 4.5045e-06 # <sup>-1</sup> .s <sup>-1</sup> | 0.1 s <sup>-1</sup>                         | 1 uM <sup>-1</sup> .s <sup>-1</sup>       | 0.1 s <sup>-1</sup>                      |
| CBP + PP1star_CREB <====> CBP_pCREB_PP1             | 5.1351e-07 # <sup>-1</sup> .s <sup>-1</sup> | 0.025 s <sup>-1</sup>                       | 0.114 uM <sup>-1</sup> .s <sup>-1</sup>   | 0.025 s <sup>-1</sup>                    |
| CBP_pCREB_PP1 + TORC1n <====> Transcr_clx_PP1       | 4.5047e-06 # <sup>-1</sup> .s <sup>-1</sup> | 0.1 s <sup>-1</sup>                         | 1 uM <sup>-1</sup> .s <sup>-1</sup>       | 0.1 s <sup>-1</sup>                      |
| PP1mRNA_clx <====> PP1_mRNA                         | 1.44 s <sup>-1</sup>                        | 0.0001 s <sup>-1</sup>                      | 1.44 s <sup>-1</sup>                      | 0.0001 s <sup>-1</sup>                   |
| PP1_mRNA <====> deg_PP1mRNA                         | 1 s <sup>-1</sup>                           | 0 s <sup>-1</sup>                           | 1 s <sup>-1</sup>                         | 0 s <sup>-1</sup>                        |
| R2C2 + cAMP <====> R2C2-cAMP                        | 9e-05 # <sup>-1</sup> .s <sup>-1</sup>      | 33 s <sup>-1</sup>                          | 54 uM <sup>-1</sup> .s <sup>-1</sup>      | 33 s <sup>-1</sup>                       |
| R2C2-cAMP + cAMP <====> R2C2-cAMP2                  | 9e-05 # <sup>-1</sup> .s <sup>-1</sup>      | 33 s <sup>-1</sup>                          | 54 uM <sup>-1</sup> .s <sup>-1</sup>      | 33 s <sup>-1</sup>                       |
| R2C2-cAMP2 + cAMP <====> R2C2-cAMP3                 | 0.000125 # <sup>-1</sup> .s <sup>-1</sup>   | 110 s <sup>-1</sup>                         | 75 uM <sup>-1</sup> .s <sup>-1</sup>      | 110 s <sup>-1</sup>                      |
| cAMP + R2C2-cAMP3 <====> R2C2-cAMP4                 | 0.000125 # <sup>-1</sup> .s <sup>-1</sup>   | 32.5 s <sup>-1</sup>                        | 75 uM <sup>-1</sup> .s <sup>-1</sup>      | 32.5 s <sup>-1</sup>                     |
| R2C2-cAMP4 <====> PKA-active + R2C-cAMP4            | 60 s <sup>-1</sup>                          | 3e-05 # <sup>-1</sup> .s <sup>-1</sup>      | 60 s <sup>-1</sup>                        | 18 uM <sup>-1</sup> .s <sup>-1</sup>     |
| R2C-cAMP4 <====> PKA-active + R2-cAMP4              | 60 s <sup>-1</sup>                          | 3e-05 # <sup>-1</sup> .s <sup>-1</sup>      | 60 s <sup>-1</sup>                        | 18 uM <sup>-1</sup> .s <sup>-1</sup>     |
| R2-cAMP4 <====> R2 + cAMP                           | 0.0005 s <sup>-1</sup>                      | 1.6667e-10 # <sup>-1</sup> .s <sup>-1</sup> | 0.0005 s <sup>-1</sup>                    | 0.0001 uM <sup>-1</sup> .s <sup>-1</sup> |
| PKA-active + R2 <====> R2C1                         | 0.0013317 # <sup>-1</sup> .s <sup>-1</sup>  | 0.186 s <sup>-1</sup>                       | 799.02 uM <sup>-1</sup> .s <sup>-1</sup>  | 0.186 s <sup>-1</sup>                    |
| PKA-active + R2C1 <====> R2C2                       | 0.0013317 # <sup>-1</sup> .s <sup>-1</sup>  | 0.186 s <sup>-1</sup>                       | 799.02 uM <sup>-1</sup> .s <sup>-1</sup>  | 0.186 s <sup>-1</sup>                    |
| PKA-active + PKA-inhibitor <====> inhibited-PKA     | 0.0001 # <sup>-1</sup> .s <sup>-1</sup>     | 1 s <sup>-1</sup>                           | 60 uM <sup>-1</sup> .s <sup>-1</sup>      | 1 s <sup>-1</sup>                        |
| PKA-active <====> PKA-active_n                      | 0.000305 s <sup>-1</sup>                    | 0.00125 s <sup>-1</sup>                     | 0.000305 s <sup>-1</sup>                  | 0.00125 s <sup>-1</sup>                  |
| CaM-Ca4 + AC1 <====> AC1-CaM                        | 8.3333e-05 # <sup>-1</sup> .s <sup>-1</sup> | 1 s <sup>-1</sup>                           | 50 uM <sup>-1</sup> .s <sup>-1</sup>      | 1 s <sup>-1</sup>                        |
| AC2_star <====> AC2                                 | 0.1 s <sup>-1</sup>                         | 0 s <sup>-1</sup>                           | 0.1 s <sup>-1</sup>                       | 0 s <sup>-1</sup>                        |
| cAMP-PDE_star <====> cAMP-PDE                       | 0.1 s <sup>-1</sup>                         | 0 s <sup>-1</sup>                           | 0.1 s <sup>-1</sup>                       | 0 s <sup>-1</sup>                        |
| PDE1 + CaM-Ca4 <====> CaM.PDE1                      | 0.0012 # <sup>-1</sup> .s <sup>-1</sup>     | 5 s <sup>-1</sup>                           | 720 uM <sup>-1</sup> .s <sup>-1</sup>     | 5 s <sup>-1</sup>                        |
| CaM-Ca3 + Ca <====> CaM-Ca4                         | 7.7501e-07 # <sup>-1</sup> .s <sup>-1</sup> | 10 s <sup>-1</sup>                          | 0.46501 uM <sup>-1</sup> .s <sup>-1</sup> | 10 s <sup>-1</sup>                       |
| CaM + Ca <====> CaM-Ca                              | 1.4141e-05 # <sup>-1</sup> .s <sup>-1</sup> | 8.4853 s <sup>-1</sup>                      | 8.4846 uM <sup>-1</sup> .s <sup>-1</sup>  | 8.4853 s <sup>-1</sup>                   |
| CaM-Ca2 + Ca <====> CaM-Ca3                         | 6.0001e-06 # <sup>-1</sup> .s <sup>-1</sup> | 10 s <sup>-1</sup>                          | 3.6001 uM <sup>-1</sup> .s <sup>-1</sup>  | 10 s <sup>-1</sup>                       |
| CaM-Ca + Ca <====> CaM-Ca2                          | 1.4141e-05 # <sup>-1</sup> .s <sup>-1</sup> | 8.4853 s <sup>-1</sup>                      | 8.4846 uM <sup>-1</sup> .s <sup>-1</sup>  | 8.4853 s <sup>-1</sup>                   |
| craf-1 + GTP-Ras <====> Raf-GTP-Ras                 | 1e-05 # <sup>-1</sup> .s <sup>-1</sup>      | 1 s <sup>-1</sup>                           | 6 uM <sup>-1</sup> .s <sup>-1</sup>       | 1 s <sup>-1</sup>                        |

|                                                      |                      |             |                    |              |              |        |
|------------------------------------------------------|----------------------|-------------|--------------------|--------------|--------------|--------|
| craf_1_star + GTP-Ras <====> Raf_star-GTP-Ras        | 1.6666e-05 #^-1.s^-1 | 0.5 s^-1    | 9.9996 uM^-1.s^-1  | 0.5 s^-1     |              |        |
| bRaf + GTP-Ras <====> braf-GTP-Ras                   | 0.0001 #^-1.s^-1     | 0.5 s^-1    | 60 uM^-1.s^-1      | 0.5 s^-1     |              |        |
| BetaGamma + inact-GEF <====> GEF-Gprot-bg            | 1e-05 #^-1.s^-1      | 1 s^-1      | 6 uM^-1.s^-1       | 1 s^-1       |              |        |
| GEF_star <====> inact-GEF                            | 1 s^-1               | 0 s^-1      | 1 s^-1             | 0 s^-1       |              |        |
| GTP-Ras <====> GDP-Ras                               | 0.0001 s^-1          | 0 s^-1      | 0.0001 s^-1        | 0 s^-1       |              |        |
| GAP_star <====> GAP                                  | 0.1 s^-1             | 0 s^-1      | 0.1 s^-1           | 0 s^-1       |              |        |
| inact-GEF + CaM-Ca4 <====> CaM-GEF                   | 0.0001 #^-1.s^-1     | 1 s^-1      | 60 uM^-1.s^-1      | 1 s^-1       |              |        |
| inact-GEF_star <====> inact-GEF                      | 1 s^-1               | 0 s^-1      | 1 s^-1             | 0 s^-1       |              |        |
| I1_star + PP1-active_c <====> PP1-I1_star            | 0.00083329 #^-1.s^-1 | 0.1 s^-1    | 499.97 uM^-1.s^-1  | 0.1 s^-1     |              |        |
| PP1-I1 <====> PP1-active_c + I1                      | 1 s^-1               | 0 #^-1.s^-1 | 1 s^-1             | 0 uM^-1.s^-1 |              |        |
| 2 Ca + CaNAB-Ca2 <====> CaNAB-Ca4                    | 9.9998e-12 #^-2.s^-1 | 1 s^-1      | 3.5999 uM^-2.s^-1  | 1 s^-1       |              |        |
| CaNAB + 2 Ca <====> CaNAB-Ca2                        | 2.7801e-08 #^-2.s^-1 | 1 s^-1      | 10008 uM^-2.s^-1   | 1 s^-1       |              |        |
| CaNAB-Ca4 + CaM-Ca2 <====> CaM-Ca2-CANAB             | 4e-07 #^-1.s^-1      | 1 s^-1      | 0.24 uM^-1.s^-1    | 1 s^-1       |              |        |
| CaNAB-Ca4 + CaM-Ca3 <====> CaM-Ca3-CaNAB             | 3.73e-06 #^-1.s^-1   | 1 s^-1      | 2.238 uM^-1.s^-1   | 1 s^-1       |              |        |
| CaM-Ca4 + CaNAB-Ca4 <====> CaM-Ca4-CaNAB             | 0.001 #^-1.s^-1      | 1 s^-1      | 600 uM^-1.s^-1     | 1 s^-1       |              |        |
| CaM-Ca4 + CaMKIVc <====> CaMKIV_CaM_Ca_c             | 2.22e-08 #^-1.s^-1   | 0.01 s^-1   | 0.01332 uM^-1.s^-1 | 0.01 s^-1    |              |        |
| CaM-Ca4 + CaMKK_c <====> CaMKK_CaM_Ca_c              | 6.75e-06 #^-1.s^-1   | 0.02 s^-1   | 4.05 uM^-1.s^-1    | 0.02 s^-1    |              |        |
| pCaMKIV_CaM_Ca_c <====> pCaMKIV_CaM_Ca_n             | 0.0009 s^-1          | 0.007 s^-1  | 0.0009 s^-1        | 0.007 s^-1   |              |        |
| BDNF_TrkB2_clx <====> BDNF_TrkB2_star_clx            | 0.02 s^-1            | 0 s^-1      | 0.02 s^-1          | 0 s^-1       |              |        |
| BDNF_TrkB_clx + TrkB <====> BDNF_TrkB2_clx           | 1.6667e-06 #^-1.s^-1 | 0.02 s^-1   | 0.99999 uM^-1.s^-1 | 0.02 s^-1    |              |        |
| TrkB + BDNF <====> BDNF_TrkB_clx                     | 1.6668e-06 #^-1.s^-1 | 0.05 s^-1   | 1 uM^-1.s^-1       | 0.05 s^-1    |              |        |
| BDNF_TrkB2_star_clx <====> 2 Int_BDNF_TrkB2_star_clx | 0.01 s^-1            | 0 #^-1.s^-1 | 0.01 s^-1          | 0 uM^-1.s^-1 |              |        |
| Int_BDNF_TrkB2_star_clx <====> TrkB                  | 0.001 s^-1           | 0.001 s^-1  | 0.001 s^-1         | 0.001 s^-1   |              |        |
| PLC_g_star <====> PLC_g                              | 0.07 s^-1            | 0 s^-1      | 0.07 s^-1          | 0 s^-1       |              |        |
| Enzymes for group ##[]                               |                      |             |                    |              |              |        |
| Enzyme-reaction                                      | k1                   | k2          | k3                 | Km           | kcat         | ratio  |
| AC2 ---PKC-active--> AC2_star                        | 1e-06 #^-1.s^-1      | 16 s^-1     | 4 s^-1             | 33.333 uM    | 4 s^-1       | 4      |
| GAP ---PKC-active--> GAP_star                        | 1e-05 #^-1.s^-1      | 16 s^-1     | 4 s^-1             | 3.3333 uM    | 4 s^-1       | 4      |
| inact-GEF ---PKC-active--> GEF_star                  | 1e-05 #^-1.s^-1      | 16 s^-1     | 4 s^-1             | 3.3333 uM    | 4 s^-1       | 4      |
| craf-1 ---PKC-active--> craf-1_star                  | 4.9999e-07 #^-1.s^-1 | 16 s^-1     | 4 s^-1             | 66.668 uM    | 4 s^-1       | 4      |
| cAMP-PDE ---PKA-active--> cAMP-PDE_star              | 1e-05 #^-1.s^-1      | 36 s^-1     | 9 s^-1             | 7.5 uM       | 9 s^-1       | 4      |
| Src ---PKA-active--> Src_star                        | 0.0033334 #^-1.s^-1  | 80 s^-1     | 20 s^-1            | 0.049999 uM  | 20 s^-1      | 4      |
| inact-GEF ---PKA-active--> inact-GEF_star            | 1e-05 #^-1.s^-1      | 36 s^-1     | 9 s^-1             | 7.5 uM       | 9 s^-1       | 4      |
| I1 ---PKA-active--> I1_star                          | 1e-05 #^-1.s^-1      | 36 s^-1     | 9 s^-1             | 7.5 uM       | 9 s^-1       | 4      |
| CaMKK_CaM_Ca_c ---PKA-active--> CaM-Ca4 + CaMKKp     | 1.2116e-06 #^-1.s^-1 | 2.7333 s^-1 | 0.68333 s^-1       | 4.6999 uM    | 0.68333 s^-1 | 4      |
| SIK2 ---PKA-active--> SIK2_star                      | 1.8117e-07 #^-1.s^-1 | 0.4 s^-1    | 0.1 s^-1           | 4.5997 uM    | 0.1 s^-1     | 4      |
| I1n ---PKA-active_n--> I1_star_n                     | 2.7027e-05 #^-1.s^-1 | 36 s^-1     | 9 s^-1             | 7.5 uM       | 9 s^-1       | 4      |
| bRaf_Rap1GTP ---Rap1GAP--> Rap1GDP + bRaf            | 0.00033667 #^-1.s^-1 | 200 s^-1    | 2 s^-1             | 0.99999 uM   | 2 s^-1       | 100    |
| Rap1GTP ---Rap1GAP--> Rap1GDP                        | 0.00033667 #^-1.s^-1 | 200 s^-1    | 2 s^-1             | 0.99999 uM   | 2 s^-1       | 100    |
| MAPKK-ser ---bRaf_Rap1GTP--> MAPKK_star              | 1.5625e-05 #^-1.s^-1 | 1.2 s^-1    | 0.3 s^-1           | 0.16 uM      | 0.3 s^-1     | 4      |
| MAPKK ---bRaf_Rap1GTP--> MAPKK-ser                   | 1.5625e-05 #^-1.s^-1 | 1.2 s^-1    | 0.3 s^-1           | 0.16 uM      | 0.3 s^-1     | 4      |
| MAPK-tyr ---MKP-1--> MAPK                            | 0.00025 #^-1.s^-1    | 16 s^-1     | 4 s^-1             | 0.13333 uM   | 4 s^-1       | 4      |
| MAPK_star ---MKP-1--> MAPK-tyr                       | 0.00025 #^-1.s^-1    | 16 s^-1     | 4 s^-1             | 0.13333 uM   | 4 s^-1       | 4      |
| craf-1_star ---PPPhosphatase2A--> craf-1             | 3.1935e-06 #^-1.s^-1 | 24 s^-1     | 6 s^-1             | 15.657 uM    | 6 s^-1       | 4      |
| MAPKK_star ---PPPhosphatase2A--> MAPKK-ser           | 3.1935e-06 #^-1.s^-1 | 24 s^-1     | 6 s^-1             | 15.657 uM    | 6 s^-1       | 4      |
| MAPKK-ser ---PPPhosphatase2A--> MAPKK                | 3.1935e-06 #^-1.s^-1 | 24 s^-1     | 6 s^-1             | 15.657 uM    | 6 s^-1       | 4      |
| craf-1_star_star ---PPPhosphatase2A--> craf-1_star   | 3.1935e-06 #^-1.s^-1 | 24 s^-1     | 6 s^-1             | 15.657 uM    | 6 s^-1       | 4      |
| ppRSK ---PDK1--> active_RSK2                         | 8.3333e-07 #^-1.s^-1 | 4 s^-1      | 1 s^-1             | 10 uM        | 1 s^-1       | 4      |
| active_RSK2 ---PP2A--> ppRSK                         | 9.4692e-07 #^-1.s^-1 | 4 s^-1      | 1 s^-1             | 8.8005 uM    | 1 s^-1       | 4      |
| I1_star ---PP2A--> I1                                | 6.6e-06 #^-1.s^-1    | 25 s^-1     | 6 s^-1             | 7.8283 uM    | 6 s^-1       | 4.1667 |
| CaMKKp ---PP2A--> CaMKK_c                            | 1.1667e-06 #^-1.s^-1 | 2.8 s^-1    | 0.7 s^-1           | 4.9999 uM    | 0.7 s^-1     | 4      |
| pCaMKIV_CaM_Ca_c ---PP2A--> CaMKIV_CaM_Ca_c          | 1.8939e-06 #^-1.s^-1 | 8 s^-1      | 2 s^-1             | 8.8002 uM    | 2 s^-1       | 4      |
| pRSK ---PP2A--> RSK                                  | 9.4692e-07 #^-1.s^-1 | 4 s^-1      | 1 s^-1             | 8.8005 uM    | 1 s^-1       | 4      |
| PP1-I1_star ---PP2A--> PP1-I1                        | 6.6e-06 #^-1.s^-1    | 25 s^-1     | 6 s^-1             | 7.8283 uM    | 6 s^-1       | 4.1667 |
| A_star ---PP1_active_n--> A                          | 2.2523e-06 #^-1.s^-1 | 0.4 s^-1    | 0.1 s^-1           | 0.99998 uM   | 0.1 s^-1     | 4      |

|                                                       |                      |            |            |              |            |        |
|-------------------------------------------------------|----------------------|------------|------------|--------------|------------|--------|
| B ---active_RSK2_n--> B_star                          | 4.5045e-07 #^-1.s^-1 | 0.4 s^-1   | 0.1 s^-1   | 5 uM         | 0.1 s^-1   | 4      |
| I1_star ---CaNAB-Ca4--> I1                            | 5.7e-08 #^-1.s^-1    | 0.136 s^-1 | 0.034 s^-1 | 4.9708 uM    | 0.034 s^-1 | 4      |
| B ---pMSK1_n--> B_star                                | 1.1261e-06 #^-1.s^-1 | 0.4 s^-1   | 0.1 s^-1   | 2 uM         | 0.1 s^-1   | 4      |
| pMSK1_n ---PP2An--> MSK1_n                            | 2.5594e-06 #^-1.s^-1 | 4 s^-1     | 1 s^-1     | 8.7999 uM    | 1 s^-1     | 4      |
| I1_star_n ---PP2An--> I1n                             | 1.7262e-05 #^-1.s^-1 | 24 s^-1    | 6 s^-1     | 7.8285 uM    | 6 s^-1     | 4      |
| PLC_g ---PLCg_basal--> PLC_g_star                     | 1.3889e-05 #^-1.s^-1 | 2 s^-1     | 0.5 s^-1   | 0.3 uM       | 0.5 s^-1   | 4      |
| Nucleotides ---Basal_transcription--> mRNA_clx        | 1.0416e-06 #^-1.s^-1 | 0.2 s^-1   | 0.05 s^-1  | 1.0812 uM    | 0.05 s^-1  | 4      |
| Nucleotides ---Basal_transcription--> mRNA_clx_CaMKIV | 1.0427e-06 #^-1.s^-1 | 0.2 s^-1   | 0.05 s^-1  | 1.08 uM      | 0.05 s^-1  | 4      |
| Nucleotides ---Basal_transcription--> PP1mRNA_clx     | 1.0427e-06 #^-1.s^-1 | 0.2 s^-1   | 0.05 s^-1  | 1.08 uM      | 0.05 s^-1  | 4      |
| C ---pCaMKIV_CaM_Ca_nuc--> C_star                     | 2.8665e-06 #^-1.s^-1 | 2.8 s^-1   | 0.7 s^-1   | 5.5 uM       | 0.7 s^-1   | 4      |
| GDP-Ras ---Shc_star.Sos.Grb2--> GTP-Ras               | 3.3e-05 #^-1.s^-1    | 0.8 s^-1   | 0.2 s^-1   | 0.050505 uM  | 0.2 s^-1   | 4      |
| Rap1GDP ---CRK_C3G_Cbl_star_clx--> Rap1GTP            | 6.6668e-05 #^-1.s^-1 | 0.2 s^-1   | 0.2 s^-1   | 0.0099998 uM | 0.2 s^-1   | 1      |
| Cbl ---Src_star--> Cbl_star                           | 0.00066665 #^-1.s^-1 | 160 s^-1   | 40 s^-1    | 0.50001 uM   | 40 s^-1    | 4      |
| MSK1_n ---MAPK_star_n--> pMSK1_n                      | 4.2496e-07 #^-1.s^-1 | 0.4 s^-1   | 0.1 s^-1   | 5.2999 uM    | 0.1 s^-1   | 4      |
| Sos ---MAPK_star--> Sos_star                          | 3.2552e-05 #^-1.s^-1 | 40 s^-1    | 10 s^-1    | 2.56 uM      | 10 s^-1    | 4      |
| RSK ---MAPK_star--> pRSK                              | 2.673e-06 #^-1.s^-1  | 6.8 s^-1   | 1.7 s^-1   | 5.2999 uM    | 1.7 s^-1   | 4      |
| craf-1_star ---MAPK_star--> craf-1_star_star          | 3.25e-06 #^-1.s^-1   | 40 s^-1    | 10 s^-1    | 25.641 uM    | 10 s^-1    | 4      |
| Nucleotides ---Transcription_clx--> mRNA_clx          | 1.0427e-06 #^-1.s^-1 | 0.2 s^-1   | 0.05 s^-1  | 1.08 uM      | 0.05 s^-1  | 4      |
| TORC1c ---SIK2--> pTORC1                              | 8.3333e-07 #^-1.s^-1 | 1.6 s^-1   | 0.4 s^-1   | 4 uM         | 0.4 s^-1   | 4      |
| I1_star ---CaM_Ca_n-CaNAB--> I1                       | 5.7e-07 #^-1.s^-1    | 1.36 s^-1  | 0.34 s^-1  | 4.9708 uM    | 0.34 s^-1  | 4      |
| pTORC1 ---CaM_Ca_n-CaNAB--> TORC1c                    | 2.0833e-06 #^-1.s^-1 | 0.4 s^-1   | 0.1 s^-1   | 0.40001 uM   | 0.1 s^-1   | 4      |
| PP1-I1_star ---CaM_Ca_n-CaNAB--> PP1-I1               | 5.7e-07 #^-1.s^-1    | 1.36 s^-1  | 0.34 s^-1  | 4.9708 uM    | 0.34 s^-1  | 4      |
| Nucleotides ---Transcription_Clx_C--> mRNA_clx_CaMKIV | 1.0427e-06 #^-1.s^-1 | 0.2 s^-1   | 0.05 s^-1  | 1.08 uM      | 0.05 s^-1  | 4      |
| A ---A_kinase--> A_star                               | 2.2524e-06 #^-1.s^-1 | 0.4 s^-1   | 0.1 s^-1   | 0.99998 uM   | 0.1 s^-1   | 4      |
| B_star ---B_phosphatase--> B                          | 2.2523e-06 #^-1.s^-1 | 0.4 s^-1   | 0.1 s^-1   | 0.99998 uM   | 0.1 s^-1   | 4      |
| C_star ---C_phosphatase--> C                          | 2.2524e-06 #^-1.s^-1 | 0.4 s^-1   | 0.1 s^-1   | 0.99998 uM   | 0.1 s^-1   | 4      |
| Nucleotides ---Transcr_clx_PP1--> PP1mRNA_clx         | 1.0427e-06 #^-1.s^-1 | 0.2 s^-1   | 0.05 s^-1  | 1.08 uM      | 0.05 s^-1  | 4      |
| ATP ---AC1-CaM--> cAMP                                | 7.5e-06 #^-1.s^-1    | 72 s^-1    | 18 s^-1    | 20 uM        | 18 s^-1    | 4      |
| cAMP ---cAMP-PDE--> AMP                               | 4.2e-06 #^-1.s^-1    | 40 s^-1    | 10 s^-1    | 19.841 uM    | 10 s^-1    | 4      |
| cAMP ---PDE1--> AMP                                   | 3.5e-07 #^-1.s^-1    | 6.67 s^-1  | 1.667 s^-1 | 39.7 uM      | 1.667 s^-1 | 4.0012 |
| cAMP ---CaM.PDE1--> AMP                               | 2.1e-06 #^-1.s^-1    | 40 s^-1    | 10 s^-1    | 39.683 uM    | 10 s^-1    | 4      |
| ATP ---AC2_star--> cAMP                               | 2.9e-06 #^-1.s^-1    | 28 s^-1    | 7 s^-1     | 20.115 uM    | 7 s^-1     | 4      |
| cAMP ---cAMP-PDE_star--> AMP                          | 8.4e-06 #^-1.s^-1    | 80 s^-1    | 20 s^-1    | 19.841 uM    | 20 s^-1    | 4      |
| MAPKK ---Raf-GTP-Ras--> MAPKK-ser                     | 1.5714e-05 #^-1.s^-1 | 1.2 s^-1   | 0.3 s^-1   | 0.15909 uM   | 0.3 s^-1   | 4      |
| MAPKK-ser ---Raf-GTP-Ras--> MAPKK_star                | 1.5714e-05 #^-1.s^-1 | 1.2 s^-1   | 0.3 s^-1   | 0.15909 uM   | 0.3 s^-1   | 4      |
| MAPKK-ser ---braf-GTP-Ras--> MAPKK_star               | 1.0417e-05 #^-1.s^-1 | 0.8 s^-1   | 0.2 s^-1   | 0.15999 uM   | 0.2 s^-1   | 4      |
| MAPKK ---braf-GTP-Ras--> MAPKK-ser                    | 1.0417e-05 #^-1.s^-1 | 0.8 s^-1   | 0.2 s^-1   | 0.15999 uM   | 0.2 s^-1   | 4      |
| MAPKK-ser ---Raf_star-GTP-Ras--> MAPKK_star           | 1.5714e-05 #^-1.s^-1 | 1.2 s^-1   | 0.3 s^-1   | 0.15909 uM   | 0.3 s^-1   | 4      |
| MAPKK ---Raf_star-GTP-Ras--> MAPKK-ser                | 1.5714e-05 #^-1.s^-1 | 1.2 s^-1   | 0.3 s^-1   | 0.15909 uM   | 0.3 s^-1   | 4      |
| MAPK ---MAPKK_star--> MAPK-tyr                        | 5.4e-05 #^-1.s^-1    | 1.2 s^-1   | 0.3 s^-1   | 0.046296 uM  | 0.3 s^-1   | 4      |
| MAPK-tyr ---MAPKK_star--> MAPK_star                   | 5.4e-05 #^-1.s^-1    | 1.2 s^-1   | 0.3 s^-1   | 0.046296 uM  | 0.3 s^-1   | 4      |
| GDP-Ras ---GEF-Gprot-bg--> GTP-Ras                    | 3.3e-07 #^-1.s^-1    | 0.08 s^-1  | 0.02 s^-1  | 0.50505 uM   | 0.02 s^-1  | 4      |
| GTP-Ras ---GAP--> GDP-Ras                             | 8.2476e-05 #^-1.s^-1 | 40 s^-1    | 10 s^-1    | 1.0104 uM    | 10 s^-1    | 4      |
| GDP-Ras ---CaM-GEF--> GTP-Ras                         | 3.3e-07 #^-1.s^-1    | 0.08 s^-1  | 0.02 s^-1  | 0.50505 uM   | 0.02 s^-1  | 4      |
| GDP-Ras ---GEF_star--> GTP-Ras                        | 3.3e-07 #^-1.s^-1    | 0.08 s^-1  | 0.02 s^-1  | 0.50505 uM   | 0.02 s^-1  | 4      |
| CaMKIV_CaM_Ca_c ---CaMKK_CaM_Ca_c--> pCaMKIV_Ca       | 7.0513e-06 #^-1.s^-1 | 4.4 s^-1   | 1.1 s^-1   | 1.3 uM       | 1.1 s^-1   | 4      |
| PLC_g ---BDNF_TrkB2_star_clx--> PLC_g_star            | 1.3889e-05 #^-1.s^-1 | 2 s^-1     | 0.5 s^-1   | 0.30001 uM   | 0.5 s^-1   | 4      |
| Shc ---BDNF_TrkB2_star_clx--> Shc_star                | 3.0003e-06 #^-1.s^-1 | 1.2 s^-1   | 0.3 s^-1   | 0.83328 uM   | 0.3 s^-1   | 4      |

Pools for group /###[]

| name         | InitialConc | buffered | Volume  |
|--------------|-------------|----------|---------|
| CaM-Ca4      | 0 uM        | 0        | 1000 fl |
| PKC-active   | 0.01 uM     | 1        | 1000 fl |
| PKA-active   | 0 uM        | 0        | 1000 fl |
| cAMP         | 0 uM        | 0        | 1000 fl |
| PKA-active_n | 0 uM        | 0        | 370 fl  |

|                     |           |   |           |
|---------------------|-----------|---|-----------|
| Ca                  | 0.08 uM   | 0 | 1000 fl   |
| Src                 | 0.02 uM   | 0 | 1000 fl   |
| Cbl                 | 0.5 uM    | 0 | 1000 fl   |
| C3G                 | 0.5 uM    | 0 | 1000 fl   |
| CRK                 | 1 uM      | 0 | 1000 fl   |
| CRK_C3G             | 0 uM      | 0 | 1000 fl   |
| Rap1GTP             | 0 uM      | 0 | 1000 fl   |
| Rap1GDP             | 0.2 uM    | 0 | 1000 fl   |
| Rap1GAP             | 0.012 uM  | 0 | 1000 fl   |
| bRaf_Rap1GTP        | 0 uM      | 0 | 1000 fl   |
| bRaf                | 0.2 uM    | 0 | 1000 fl   |
| MKP-1               | 0.015 uM  | 0 | 1000 fl   |
| PPhosphatase2A      | 1 uM      | 0 | 1000 fl   |
| MSK1_n              | 0.2 uM    | 0 | 370 fl    |
| PDK1                | 1 uM      | 0 | 1000 fl   |
| PP2A                | 0.15 uM   | 1 | 1000 fl   |
| PP1_active_n        | 0 uM      | 0 | 370 fl    |
| ppRSK               | 0 uM      | 0 | 1000 fl   |
| active_RSK2         | 0 uM      | 0 | 1000 fl   |
| active_RSK2_n       | 0 uM      | 0 | 370 fl    |
| RSK                 | 0.2 uM    | 0 | 1000 fl   |
| pRSK                | 0 uM      | 0 | 1000 fl   |
| BetaGamma           | 0 uM      | 0 | 1000 fl   |
| CaNAB-Ca4           | 0 uM      | 0 | 1000 fl   |
| PP1-active_c        | 1.8 uM    | 0 | 1000 fl   |
| pMSK1_n             | 0 uM      | 0 | 370 fl    |
| Ca_input            | 0 uM      | 0 | 1000 fl   |
| PP2An               | 0.1 uM    | 0 | 370 fl    |
| BDNF                | 5e-05 uM  | 1 | 999.97 fl |
| PLC_g               | 0.1 uM    | 0 | 1000 fl   |
| PLCg_basal          | 0.0007 uM | 0 | 1000 fl   |
| Grb2                | 1 uM      | 0 | 1000 fl   |
| Shc                 | 0.5 uM    | 0 | 1000 fl   |
| Sos                 | 0.1 uM    | 0 | 1000 fl   |
| Sos.Grb2            | 0 uM      | 0 | 1000 fl   |
| CBP                 | 0.5 uM    | 0 | 370 fl    |
| mRNA_cx             | 0 uM      | 0 | 370 fl    |
| Basal_transcription | 5e-05 uM  | 0 | 370 fl    |
| mRNA                | 0 uM      | 0 | 370 fl    |
| degraded_mRNA       | 0 uM      | 1 | 370 fl    |
| Basal_CaMKIV        | 0.0005 uM | 0 | 1000 fl   |
| pCaMKIV_CaM_Ca_nuc  | 0 uM      | 0 | 370 fl    |
| pCaMKIV_CaM_Ca_n    | 0 uM      | 0 | 370 fl    |
| Basal_CaMKIV_n      | 5e-05 uM  | 0 | 370 fl    |
| Sum_total_CaMKIV    | 0 uM      | 0 | 1000 fl   |
| MAPK_active_total   | 0 uM      | 0 | 1000 fl   |
| Basal_MAPK_active   | 0.0001 uM | 0 | 1000 fl   |
| Shc_star            | 0 uM      | 0 | 1000 fl   |
| PLC_g_star          | 0 uM      | 0 | 1000 fl   |
| Sos_star            | 0 uM      | 0 | 1000 fl   |
| Shc_star.Sos.Grb2   | 0 uM      | 0 | 1000 fl   |
| Sos_star.Grb2       | 0 uM      | 0 | 1000 fl   |
| CRK_C3G_Cbl_star_cx | 0 uM      | 0 | 1000 fl   |
| Cbl_star            | 0 uM      | 0 | 1000 fl   |
| Src_star            | 0 uM      | 0 | 1000 fl   |
| MAPK_star_n         | 0 uM      | 0 | 370 fl    |

|                     |               |   |              |
|---------------------|---------------|---|--------------|
| MAPK_star           | 0 uM          | 0 | 1000 fl      |
| pTORC1              | 0 uM          | 0 | 1000 fl      |
| TORC1n              | 0 uM          | 0 | 370 fl       |
| TORC1c              | 0.1 uM        | 0 | 1000 fl      |
| CBP_pCREB_CRE       | 0 uM          | 0 | 370 fl       |
| Transcription_clx   | 0 uM          | 0 | 370 fl       |
| Nucleotides         | 0.2 uM        | 1 | 369.98 fl    |
| SIK2                | 0.5 uM        | 0 | 1000 fl      |
| SIK2_star           | 0 uM          | 0 | 1000 fl      |
| PP1-I1n             | 0 uM          | 0 | 370 fl       |
| I1n                 | 0 uM          | 0 | 370 fl       |
| I1_star_n           | 0 uM          | 0 | 369.98 fl    |
| CaM_Ca_n-CaNAB      | 0 uM          | 0 | 1000 fl      |
| CBP_pCREB_CaMKIV    | 0 uM          | 0 | 370 fl       |
| Transcription_Clx_C | 0 uM          | 0 | 370 fl       |
| mRNA_clx_CaMKIV     | 0 uM          | 0 | 370 fl       |
| mRNA_CaMKIV         | 0 uM          | 0 | 370 fl       |
| deg_mRNA_CaMKIV     | 0 uM          | 1 | 370 fl       |
| B                   | 0.1 uM        | 0 | 370 fl       |
| B_star              | 0 uM          | 0 | 370 fl       |
| C                   | 0.1 uM        | 0 | 370 fl       |
| C_star              | 0 uM          | 0 | 370 fl       |
| A_star              | 0 uM          | 0 | 370 fl       |
| A                   | 0.1 uM        | 0 | 369.98 fl    |
| A_kinase            | 0.1 uM        | 0 | 369.98 fl    |
| CREB                | 0.5 uM        | 0 | 370 fl       |
| B_phosphatase       | 0.1 uM        | 0 | 370 fl       |
| C_phosphatase       | 0.1 uM        | 0 | 369.98 fl    |
| MAPKstar_CREB       | 0 uM          | 0 | 370 fl       |
| CaMKIVstar_CREB     | 0 uM          | 0 | 370 fl       |
| PP1star_CREB        | 0 uM          | 0 | 370 fl       |
| CBP_pCREB_PP1       | 0 uM          | 0 | 369.98 fl    |
| Transcr_clx_PP1     | 0 uM          | 0 | 370 fl       |
| PP1mRNA_clx         | 0 uM          | 0 | 370 fl       |
| PP1_mRNA            | 0 uM          | 0 | 370 fl       |
| deg_PP1mRNA         | 0 uM          | 1 | 370 fl       |
| total_PP1_active    | 0 uM          | 0 | 1000 fl      |
| R2C2                | 0.5 uM        | 0 | 1000 fl      |
| R2C2-cAMP           | 0 uM          | 0 | 1000 fl      |
| R2C2-cAMP2          | 0 uM          | 0 | 1000 fl      |
| R2C2-cAMP3          | 0 uM          | 0 | 1000 fl      |
| R2C2-cAMP4          | 0 uM          | 0 | 1000 fl      |
| R2C-cAMP4           | 0 uM          | 0 | 1000 fl      |
| R2-cAMP4            | 0 uM          | 0 | 1000 fl      |
| R2                  | 0 uM          | 0 | 1000 fl      |
| R2C1                | 0 uM          | 0 | 1000 fl      |
| inhibited-PKA       | 0 uM          | 0 | 1000 fl      |
| PKA-inhibitor       | 0.25 uM       | 0 | 1000 fl      |
| ATP                 | 5000 uM       | 1 | 1000 fl      |
| AC1-CaM             | 0 uM          | 0 | 1000 fl      |
| AC1                 | 0.02 uM       | 0 | 1000 fl      |
| AC2                 | 0.015 uM      | 0 | 1000 fl      |
| AMP                 | 3.2549e+05 uM | 0 | 0.0016667 fl |
| cAMP-PDE            | 0.45 uM       | 0 | 1000 fl      |
| PDE1                | 2 uM          | 0 | 1000 fl      |
| CaM.PDE1            | 0 uM          | 0 | 1000 fl      |

|                         |          |   |           |
|-------------------------|----------|---|-----------|
| AC2_star                | 0 uM     | 0 | 1000 fl   |
| cAMP-PDE_star           | 0 uM     | 0 | 1000 fl   |
| CaM                     | 20 uM    | 0 | 1000 fl   |
| CaM-Ca3                 | 0 uM     | 0 | 1000 fl   |
| CaM-Ca2                 | 0 uM     | 0 | 1000 fl   |
| CaM-Ca                  | 0 uM     | 0 | 1000 fl   |
| craf-1                  | 0.2 uM   | 0 | 1000 fl   |
| MAPKK                   | 0.18 uM  | 0 | 1000 fl   |
| MAPK                    | 0.36 uM  | 0 | 1000 fl   |
| MAPK-tyr                | 0 uM     | 0 | 1000 fl   |
| MAPKK-ser               | 0 uM     | 0 | 1000 fl   |
| Raf-GTP-Ras             | 0 uM     | 0 | 1000 fl   |
| braf-GTP-Ras            | 0 uM     | 0 | 1000 fl   |
| craf-1_star             | 0 uM     | 0 | 1000 fl   |
| craf-1_star_star        | 0 uM     | 0 | 1000 fl   |
| Raf_star-GTP-Ras        | 0 uM     | 0 | 1000 fl   |
| MAPKK_star              | 0 uM     | 0 | 1000 fl   |
| GEF-Gprot-bg            | 0 uM     | 0 | 1000 fl   |
| inact-GEF               | 0.1 uM   | 0 | 1000 fl   |
| GTP-Ras                 | 0 uM     | 0 | 1000 fl   |
| GDP-Ras                 | 0.5 uM   | 0 | 1000 fl   |
| GAP                     | 0.01 uM  | 0 | 1000 fl   |
| CaM-GEF                 | 0 uM     | 0 | 1000 fl   |
| GEF_star                | 0 uM     | 0 | 1000 fl   |
| inact-GEF_star          | 0 uM     | 0 | 1000 fl   |
| GAP_star                | 0 uM     | 0 | 1000 fl   |
| I1                      | 1.8 uM   | 0 | 1000 fl   |
| PP1-I1                  | 0 uM     | 0 | 1000 fl   |
| I1_star                 | 0.001 uM | 0 | 1000 fl   |
| PP1-I1_star             | 0 uM     | 0 | 1000 fl   |
| CaNAB                   | 1 uM     | 0 | 1000 fl   |
| CaNAB-Ca2               | 0 uM     | 0 | 1000 fl   |
| CaMca3-CaNAB            | 0 uM     | 0 | 1000 fl   |
| CaMca2-CaNAB            | 0 uM     | 0 | 1000 fl   |
| CaMca4-CaNAB            | 0 uM     | 0 | 1000 fl   |
| pCaMKIV_CaM_Ca_c        | 0 uM     | 0 | 1000 fl   |
| CaMKIVc                 | 1 uM     | 0 | 1000 fl   |
| CaMKKp                  | 0 uM     | 0 | 1000 fl   |
| CaMKK_c                 | 0.5 uM   | 0 | 1000 fl   |
| CaMKK_CaM_Ca_c          | 0 uM     | 0 | 1000 fl   |
| CaMKIV_CaM_Ca_c         | 0 uM     | 0 | 1000 fl   |
| pCaMKIV_CaM_Ca_c_tot    | 0 uM     | 0 | 1000 fl   |
| TrkB                    | 0.25 uM  | 0 | 999.93 fl |
| BDNF_TrkB2_clx          | 0 uM     | 0 | 999.97 fl |
| BDNF_TrkB_clx           | 0 uM     | 0 | 999.93 fl |
| BDNF_TrkB2_star_clx     | 0 uM     | 0 | 999.97 fl |
| Int_BDNF_TrkB2_star_clx | 0.25 uM  | 1 | 1000 fl   |

-----
