# Supplementary material for: Transcription Control Pathways Decode Patterned Synaptic Inputs into Diverse mRNA Expression Profiles
Source: PubMed Central journal article supplement (PMC4006808; doi:10.1371/journal.pone.0095154), 2014-05-01
Supplement: pone.0095154.s004.pdf [file pone.0095154.s004.pdf]

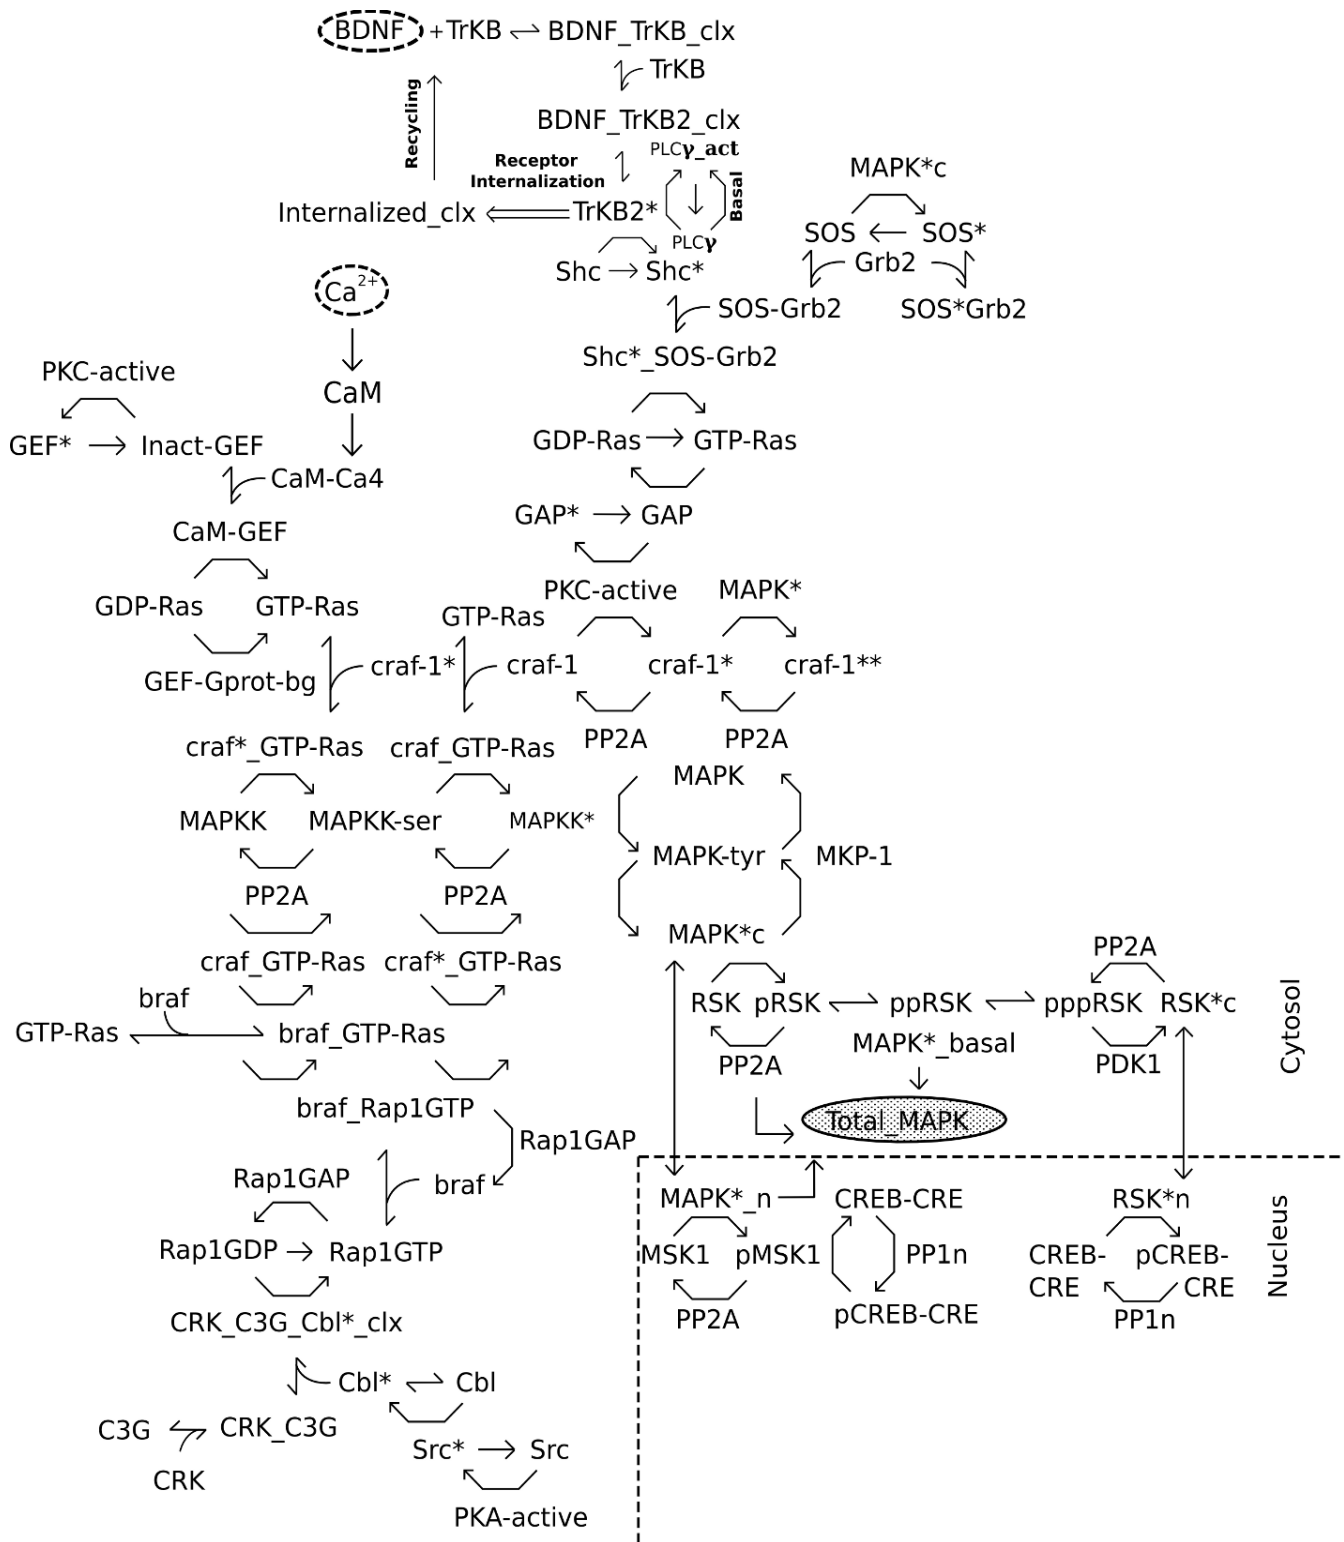

**Figure S2. Chemical reaction diagram of MAPK pathway showing activation of MAPK by bRaf and cRaf.** The model further includes downstream steps involving RSK, PDK1, and nuclear transport leading to activation of CREB-CRE. The inputs to the pathway are  $Ca^{2+}$  and BDNF.

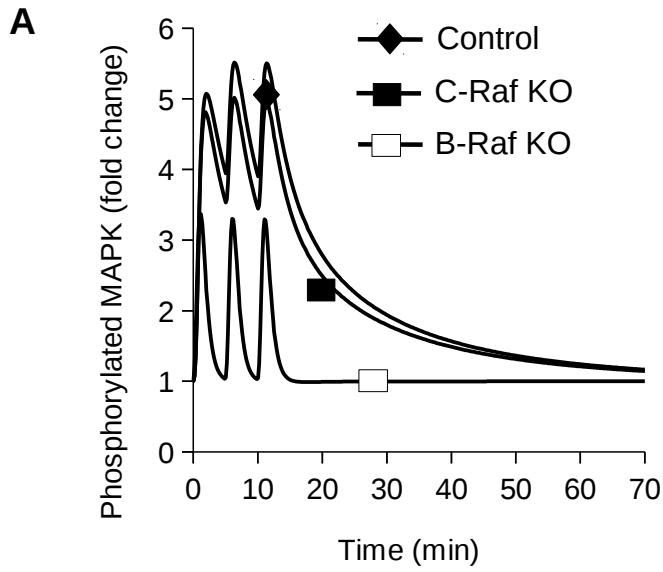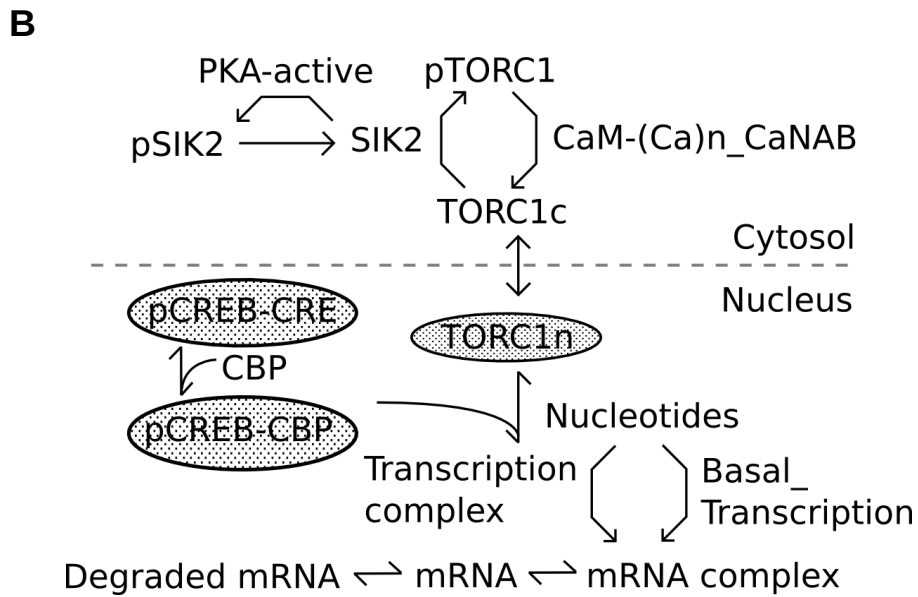

**Figure S3. Phosphorylated MAPK as a function of time and chemical reaction diagram of submodels.**

(A) The B-Raf pathway contributes to slow phase of active MAPK formation.

(B) Chemical reaction diagram of CREB, TORC1 and mRNA synthesis submodel.

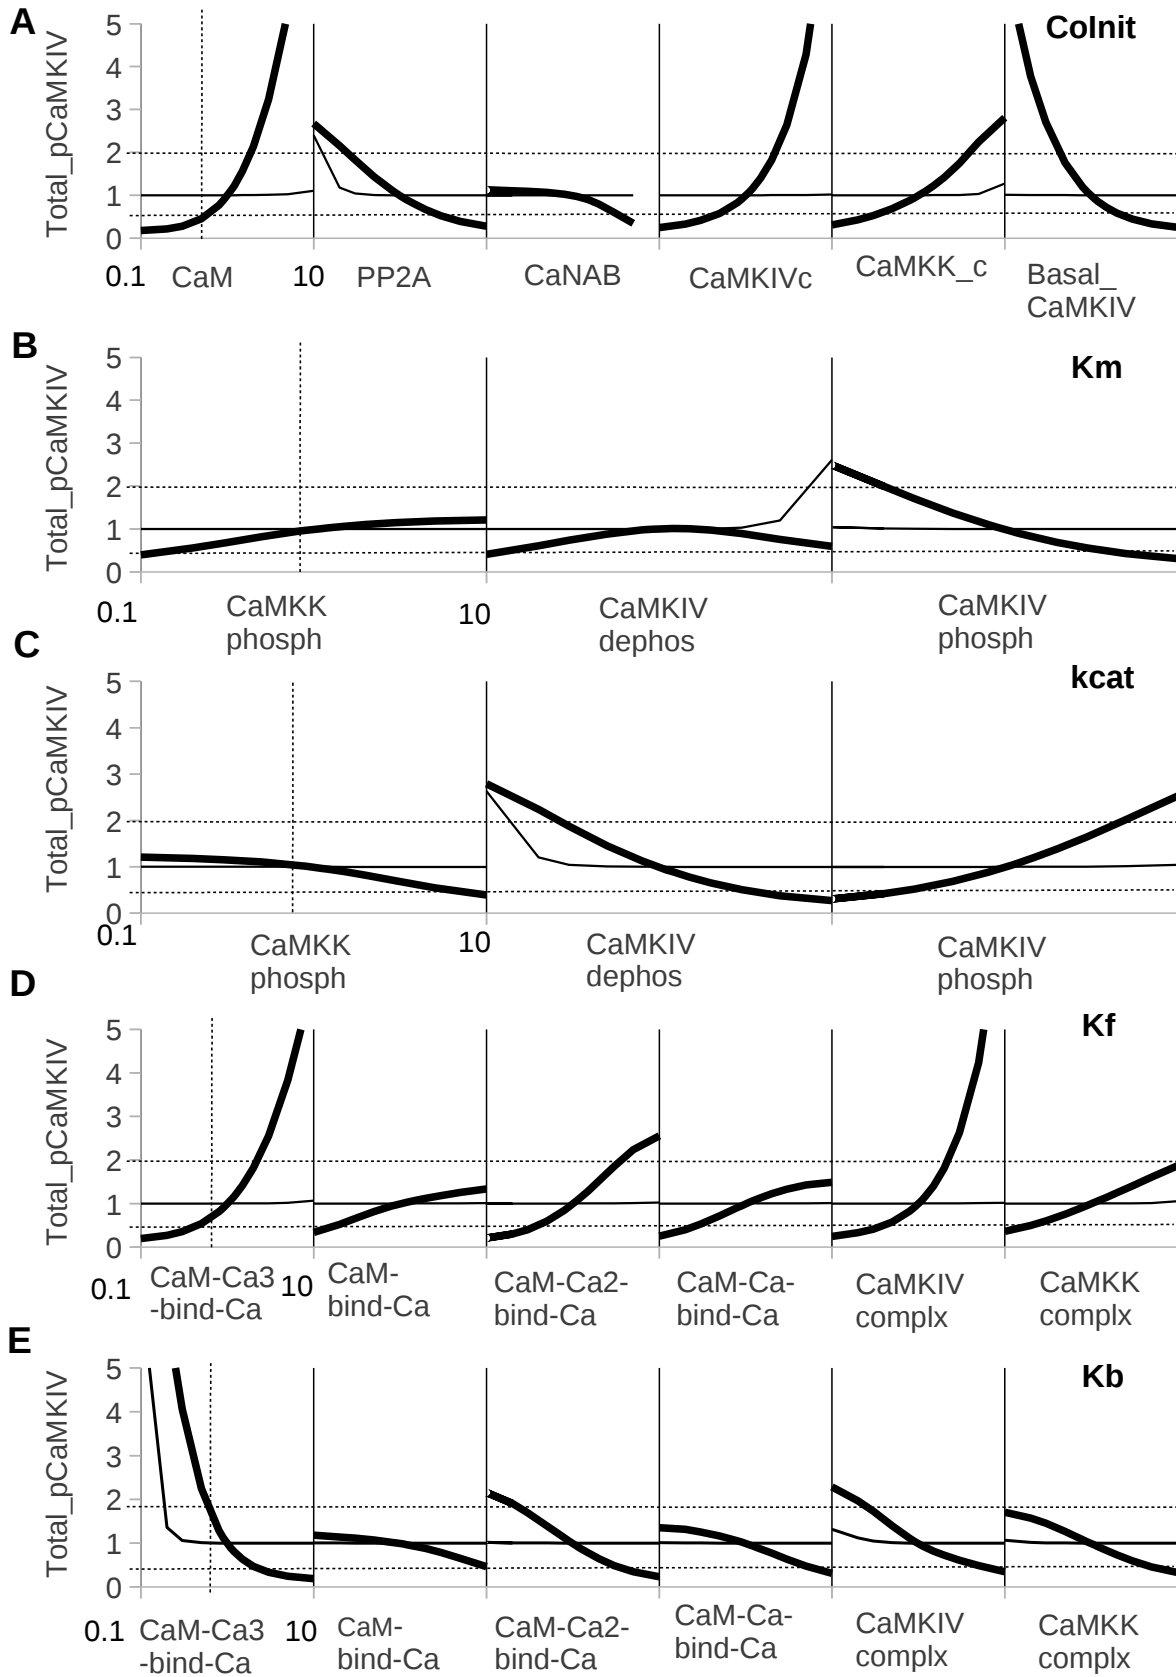

**Figure S4. Parameter sensitivity analysis for Total\_pCaMKIV.** We systematically varied the Colnit, Km, kcat, kf and kb from 0.1 to 10 fold the original model value.

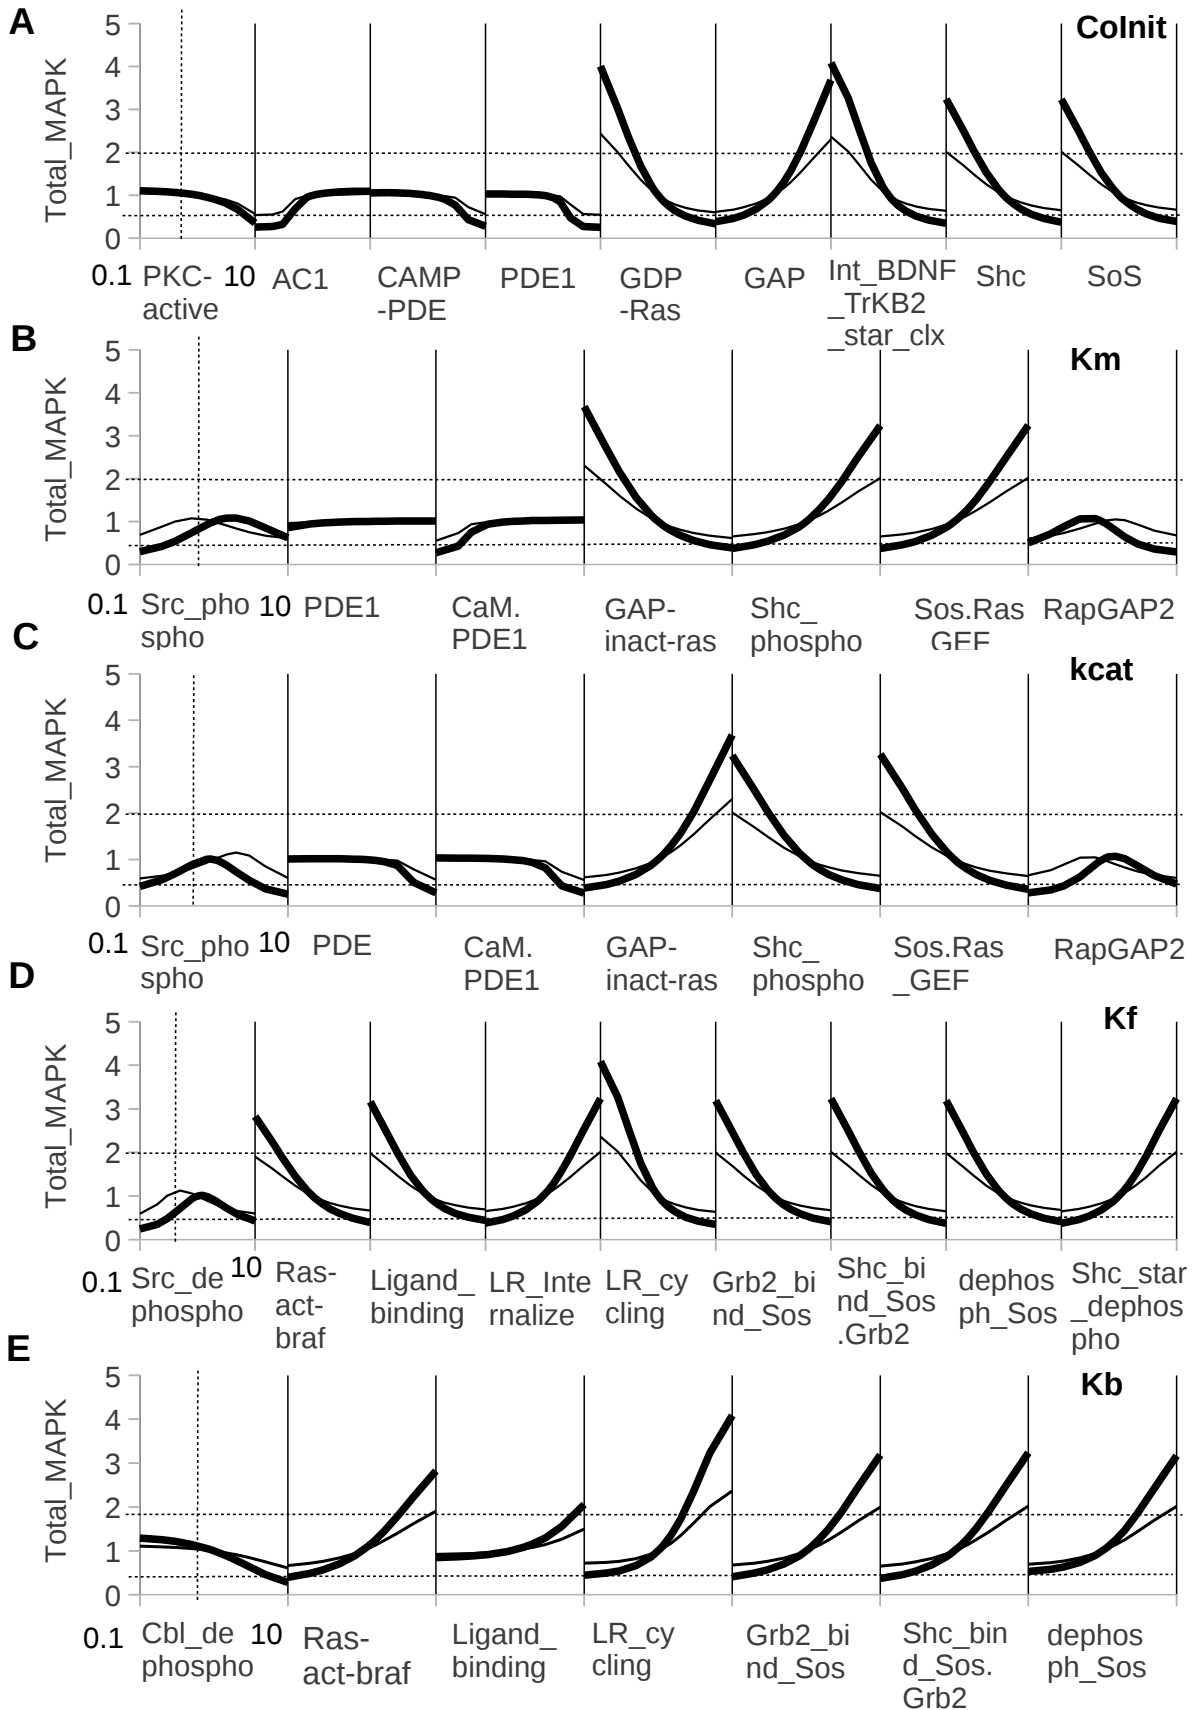

**Figure S5. Parameter sensitivity analysis for Total\_MAPK.** We systematically varied the Colnit, Km, kcat, kf and kb from 0.1 to 10 fold the original model value.

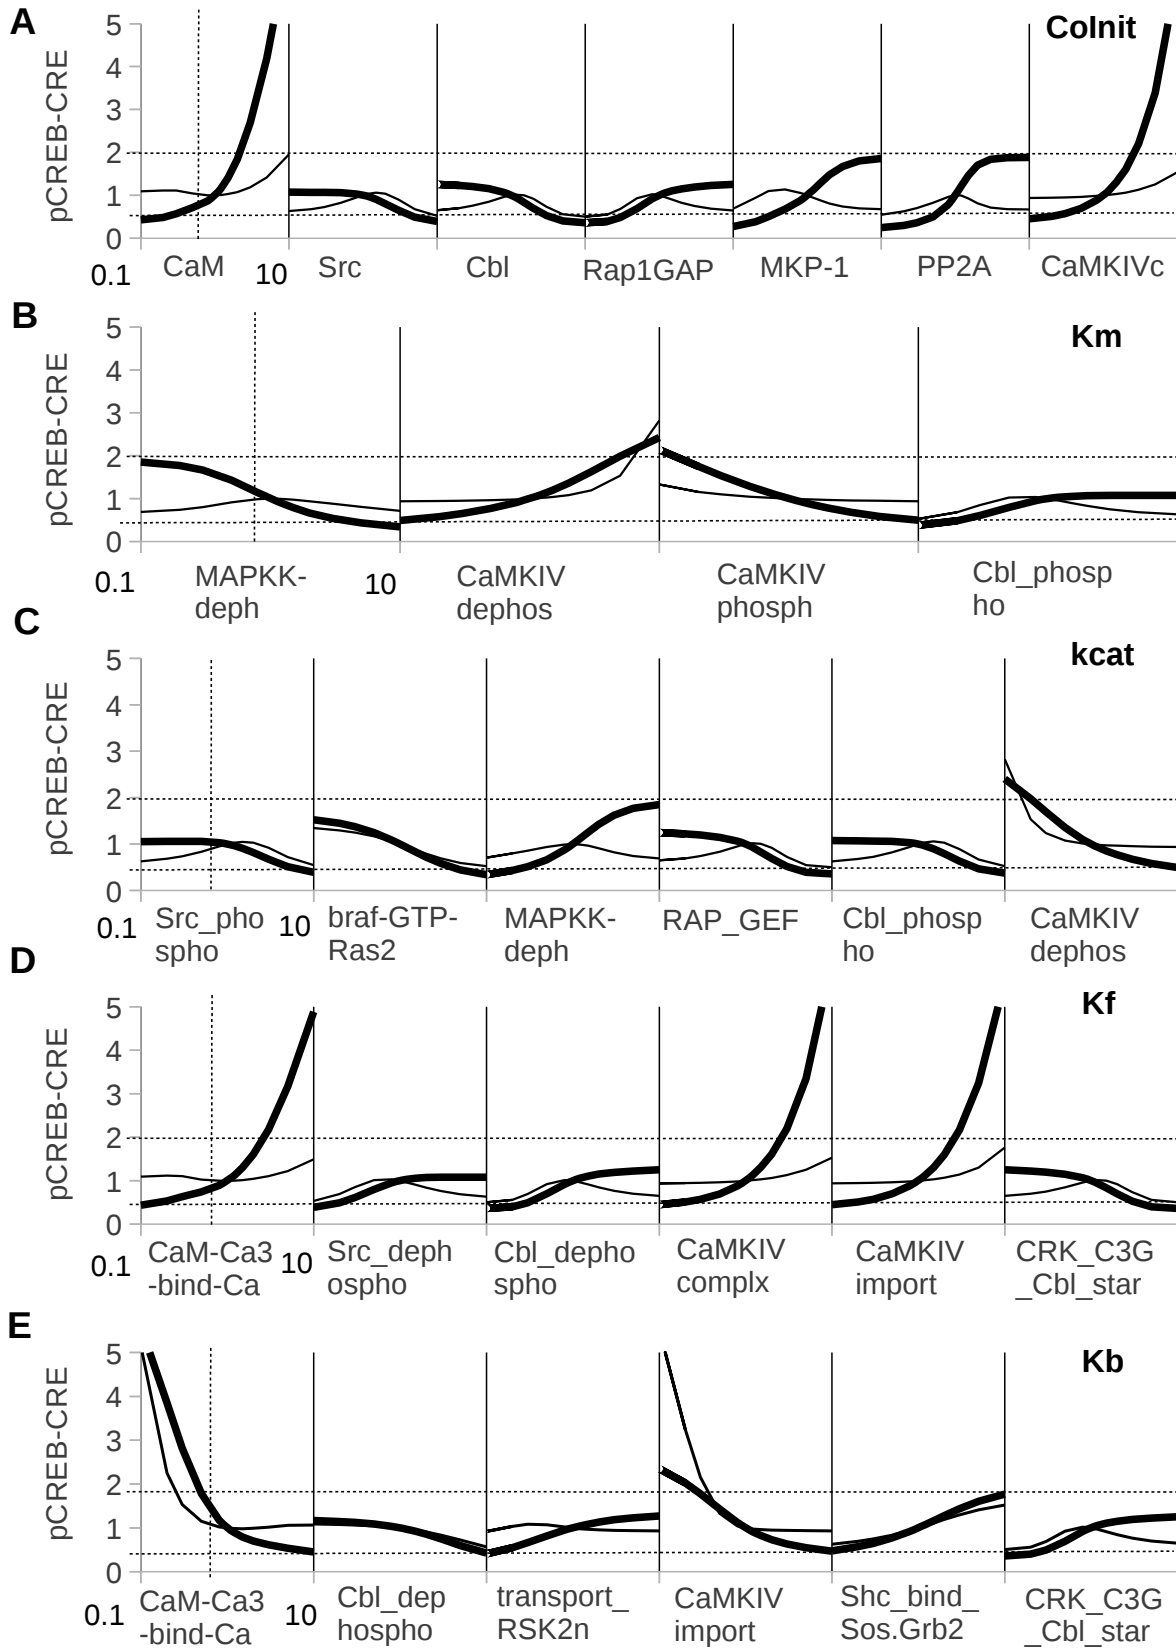

**Figure S6. Parameter sensitivity analysis for pCREB\_CRE.** We systematically varied the Colnit, Km, kcat, kf and kb from 0.1 to 10 fold the original model value.

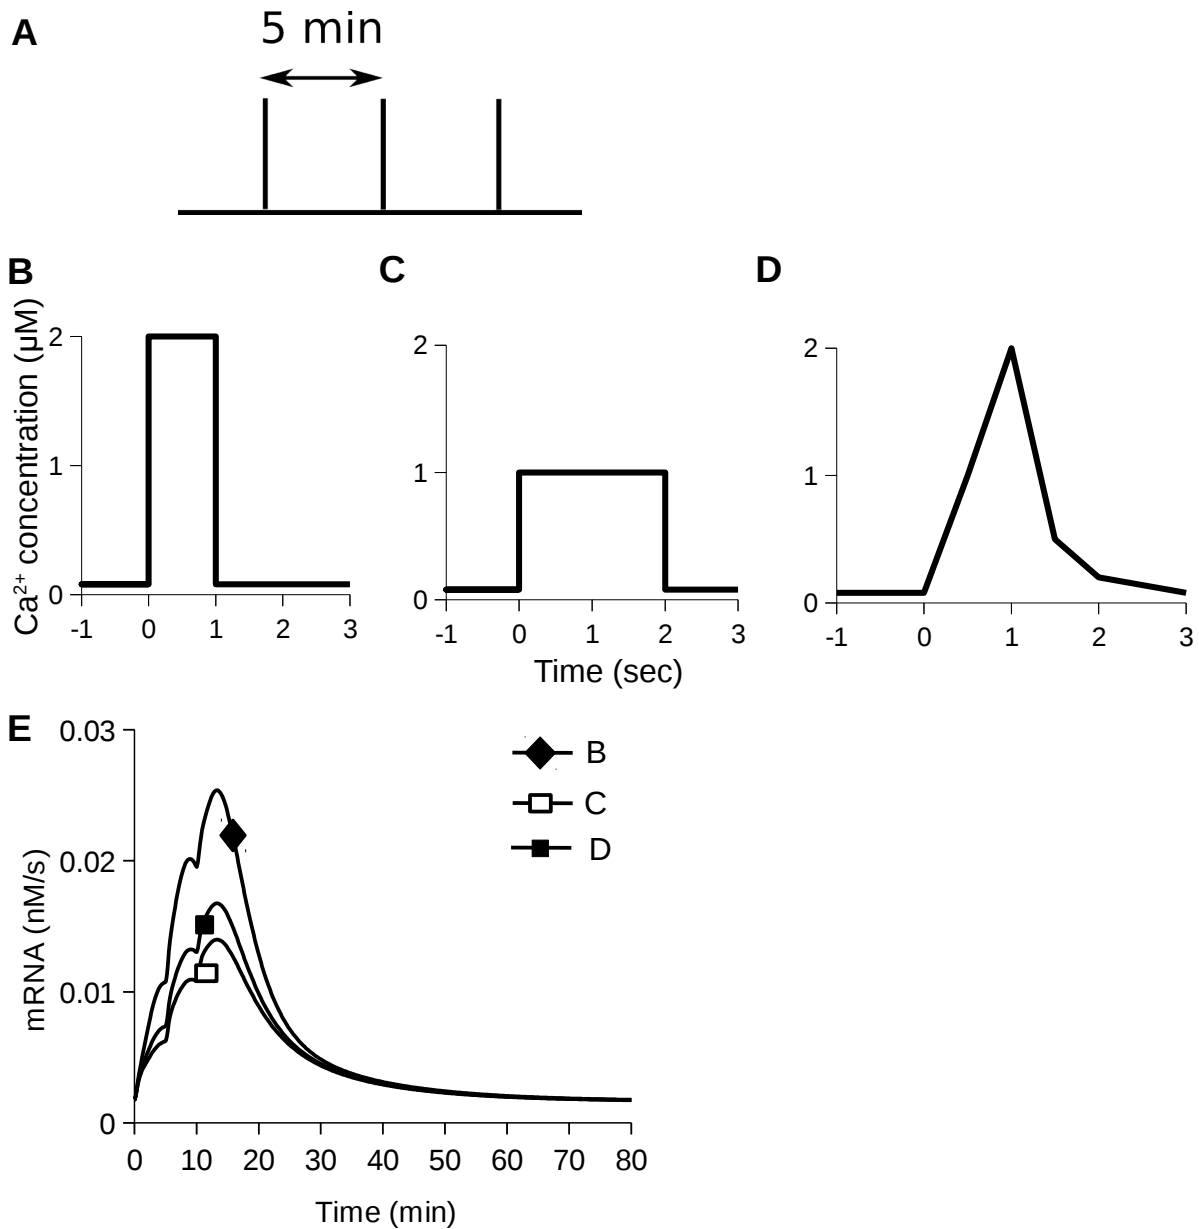

**Figure S7. Sensitivity of mRNA synthesis rate for various calcium-input patterns.** The stimuli presented were (A) three pulses of Ca<sup>2+</sup> presented with a 5 min spacing. (B) Each pulse was of 2 µM amplitude and 1 sec wide. (C) Each pulse was of 1 µM amplitude and 2 sec wide. (D) Each pulse reached a peak of 2 µM amplitude near the end of the pulse and then decayed with a half-time of ~5 sec to the baseline level. (E) mRNA synthesis was moderately sensitive to the peak Ca<sup>2+</sup> levels.

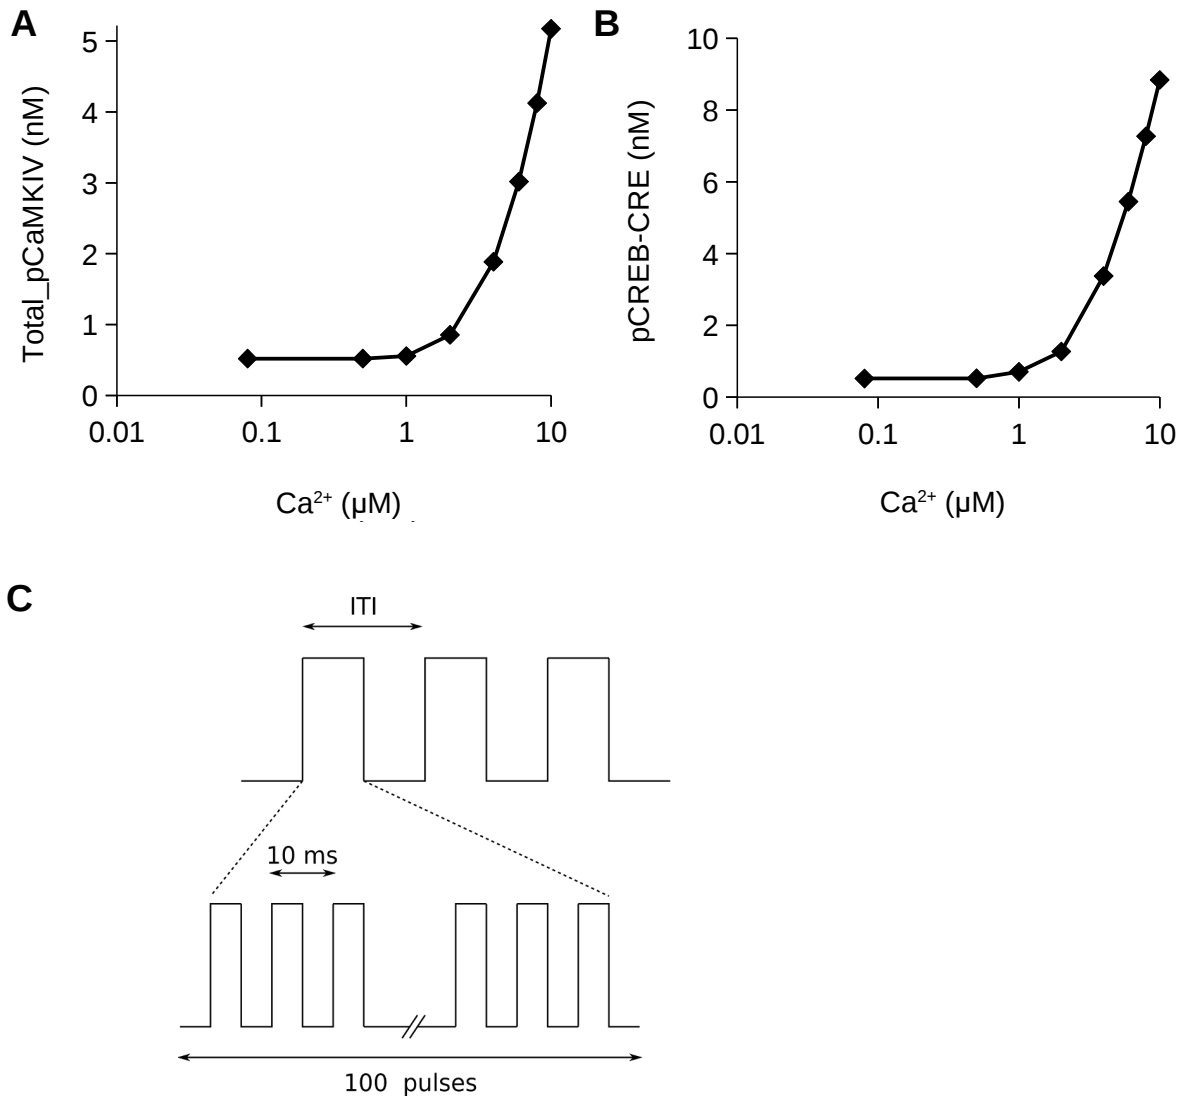

**Figure S8. Total\_pCaMKIV and pCREB-CRE as a function of Ca<sup>2+</sup> level.**

(A) Total\_pCaMKIV and (B) pCREB-CRE as a function of Ca<sup>2+</sup> level.

(C) Stimulus pattern to examine tuning of model to strong inputs. Three tetani of 100 Hz for 1 sec were delivered separated by an inter tetanus intervals (ITI). The Ca<sup>2+</sup> stimulus duration and amplitude were held constant for 1 sec and 2 μM respectively.



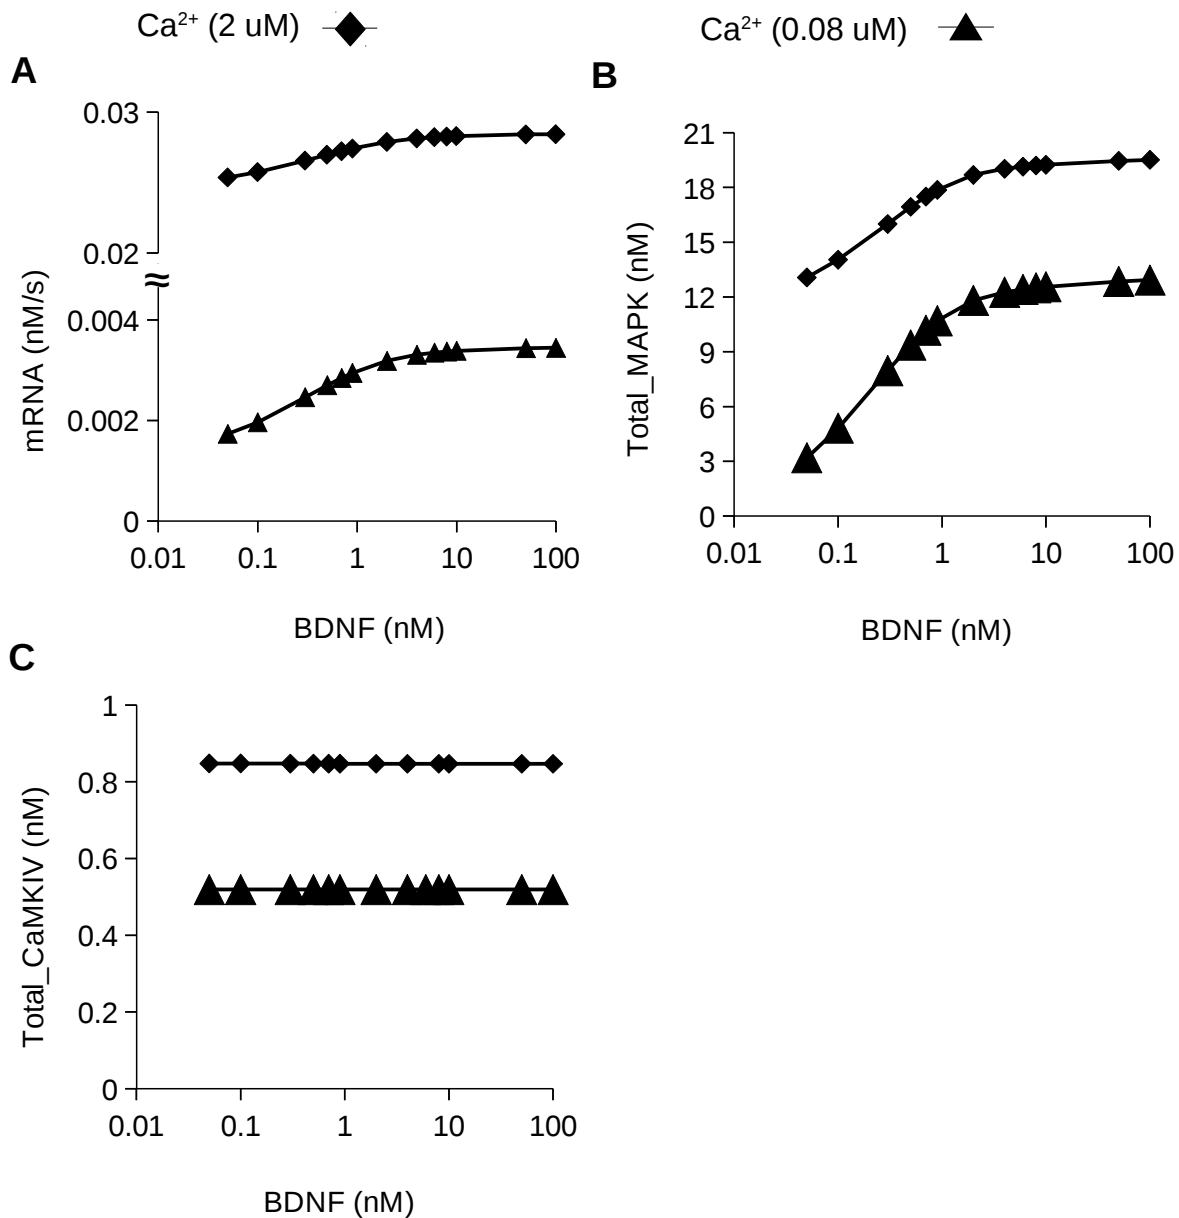

**Figure S9. Response of model to combinations of  $\text{Ca}^{2+}$  and BDNF stimulation,** measured 18 minutes after onset of stimulus. Triangles:  $\text{Ca}^{2+}$  held at baseline (0.08  $\mu\text{M}$ ), diamonds: three  $\text{Ca}^{2+}$  pulses of 2  $\mu\text{M}$  for 1 sec each, separated by 5 min. In both cases, the steady stimulus of BDNF was applied at indicated concentration. (A) Protein synthesis. At baseline  $\text{Ca}^{2+}$  the mRNA synthesis level responds to BDNF, but at high  $\text{Ca}^{2+}$  the response is saturated and BDNF causes very little change in the mRNA synthesis rate. (B) Total MAPK activation. MAPK underwent some activation by BDNF both with and without the  $\text{Ca}^{2+}$  stimulus. (C) Total CaMKIV activation. Here there was no response to BDNF.
